# Supplementary material for: Deciphering the Molecular Mechanisms of Reactive Metabolite Formation in the Mechanism-Based Inactivation of Cytochrome p450 1B1 by 8-Methoxypsoralen and Assessing the Driving Effect of phe268
Source: MDPI journal article supplement (doi:10.3390/molecules29071433), 2024-03-22
Supplement: s1 [file s1]

# Deciphering the Molecular Mechanisms of Reactive Metabolite Formation in the Mechanism-Based Inactivation of Cytochrome p450 1B1 by 8-Methoxypsoralen and Assessing the Driving Effect of phe268

Emadeldin M. Kamel <sup>1</sup>, Maha A. Alwaili <sup>2,\*</sup>, Hassan A. Rudayni <sup>3</sup>, Ahmed A. Allam <sup>3,4</sup> and Al Mokhtar Lamsabhi <sup>5,6,\*</sup>

- <sup>1</sup> Chemistry Department, Faculty of Science, Beni-Suef University, Beni-Suef 62514, Egypt; emad.abdelhameed@science.bsu.edu.eg
- <sup>2</sup> Department of Biology, College of Science, Princess Nourah bint Abdulrahman University, P.O. Box 84428, Riyadh 11671, Saudi Arabia
- <sup>3</sup> Department of Biology, College of Science, Imam Mohammad Ibn Saud Islamic University, Riyadh 11623, Saudi Arabia; harudayni@imamu.edu.sa (H.A.R.); ahmed.aliahmed@science.bsu.edu.eg (A.A.A.)
- <sup>4</sup> Department of Zoology, Faculty of Science, Beni-Suef University, Beni-Suef 65211, Egypt
- <sup>5</sup> Departamento de Química, Módulo 13, Universidad Autónoma de Madrid, Campus de Excelencia UAM-CSIC Cantoblanco, 28049 Madrid, Spain
- <sup>6</sup> Institute for Advanced Research in Chemical Sciences (IAdChem), Universidad Autónoma de Madrid, 28049 Madrid, Spain
- \* Correspondence: maalwale@pnu.edu.sa (M.A.A.); mokhtar.lamsabhi@uam.es (A.M.L.)

## Table of Contents

|                                                                                                                                                                                                  |       |
|--------------------------------------------------------------------------------------------------------------------------------------------------------------------------------------------------|-------|
| Table S1. Relative energies (RE) (in kcal/mol) and atomic energies (in a.u.) at the B3LYP level of theory for the MBI of P450 by 8-MP through 8-OMe C-H hydroxylation (Path A).....              | S2    |
| Table S2. Relative energies (RE) (in kcal/mol) and atomic energies (in a.u.) at the B3LYP level of theory for the MBI of P450 by 8-MP through C3=C4 epoxidation (Path B).....                    | S2    |
| Table S3. Relative energies (RE) (in kcal/mol) and atomic energies (in a.u.) at the B3LYP level of theory for the MBI of P450 by 8-MP through C4'=C5' epoxidation (Path C).....                  | S3    |
| Table S4. Relative energies (RE) (in kcal/mol) and atomic energies (in a.u.) at the B3LYP level of theory for the MBI of P450 by 8-MP through C4'=C5' epoxidation directed by phenylalanine..... | S3    |
| Table S5. Relative energies (RE) (in kcal/mol) and atomic energies (in a.u.) at the B3LYP level of theory for various mechanisms of reactive metabolites reactions of 8-MP epoxide.....          | S4    |
| Cartesian coordinates of all structures represented in this study.....                                                                                                                           | S5-66 |

**Table S1. Relative energies (RE) (in kcal/mol) and atomic energies (in a.u.) at the B3LYP level of theory for the MBI of P450 by 8-MP through 8-OMe C-H hydroxylation (Path A)**

|                                  | UB3LYP/BS1     |        | UB3LYP/BS1+ZPE |        | UB3LYP/BS2//BS1 |        | UB3LYP/BS2//BS1+ZPE |        | UB3LYP/BS2//BS1 +Bulk<br>Polarity |        | UB3LYP/BS2//BS1+ZPE<br>+Bulk Polarity |        |
|----------------------------------|----------------|--------|----------------|--------|-----------------|--------|---------------------|--------|-----------------------------------|--------|---------------------------------------|--------|
|                                  | AE             | RE     | AE             | RE     | AE              | RE     | AE                  | RE     | AE                                | RE     | AE                                    | RE     |
| <sup>2</sup> RC <sub>A</sub>     | -2348.25803400 | 0.00   | -2347.79099000 | 0.00   | -2349.27036700  | 0.00   | -2348.80332300      | 0.00   | -2349.28982200                    | 0.00   | -2348.82277800                        | 0.00   |
| <sup>4</sup> RC <sub>A</sub>     | -2348.25809600 | -0.04  | -2347.79098300 | 0.00   | -2349.27024300  | 0.08   | -2348.80313000      | 0.12   | -2349.28976100                    | 0.04   | -2348.82264800                        | 0.08   |
| <sup>2</sup> TS-H <sub>A</sub>   | -2348.22260300 | 22.23  | -2347.76256800 | 17.84  | -2349.24116800  | 18.32  | -2348.78113300      | 13.92  | -2349.26273800                    | 17.00  | -2348.80270300                        | 12.60  |
| <sup>4</sup> TS-H <sub>A</sub>   | -2348.22309100 | 21.93  | -2347.76222000 | 18.05  | -2349.24186500  | 17.89  | -2348.78099400      | 14.01  | -2349.26148500                    | 17.78  | -2348.80061400                        | 13.91  |
| <sup>2</sup> INT <sub>A</sub>    | -2348.23259100 | 15.97  | -2347.76564500 | 15.90  | -2349.26212350  | 5.17   | -2348.79517750      | 5.11   | -2349.282412                      | 4.65   | -2348.81546600                        | 4.59   |
| <sup>4</sup> INT <sub>A</sub>    | -2348.23173600 | 16.50  | -2347.76801900 | 14.41  | -2349.25818700  | 7.64   | -2348.79447000      | 5.56   | -2349.278685                      | 6.99   | -2348.81496800                        | 4.90   |
| <sup>4</sup> TS-reb <sub>A</sub> | -2348.22739600 | 19.23  | -2347.76506000 | 16.27  | -2349.25584300  | 9.11   | -2348.79350700      | 6.16   | -2349.275218                      | 9.16   | -2348.81288200                        | 6.21   |
| <sup>2</sup> P-OH <sub>A</sub>   | -2348.33430900 | -47.86 | -2347.86364800 | -45.59 | -2349.36567400  | -59.81 | -2348.89501300      | -57.54 | -2349.388021                      | -61.62 | -2348.91736000                        | -59.35 |
| <sup>4</sup> P-OH <sub>A</sub>   | -2348.32778000 | -43.77 | -2347.85897900 | -42.66 | -2349.34287300  | -45.50 | -2348.87407200      | -44.40 | -2349.367856                      | -48.97 | -2348.89905500                        | -47.86 |

**Table S2. Relative energies (RE) (in kcal/mol) and atomic energies (in a.u.) at the B3LYP level of theory for the MBI of P450 by 8-MP through C3=C4 epoxidation (Path B).**

|                                 | UB3LYP/BS1     |        | UB3LYP/BS1+ZPE |        | UB3LYP/BS2//BS1 |        | UB3LYP/BS2//BS1+ZPE |        | UB3LYP/BS2//BS1 +Bulk<br>Polarity |        | UB3LYP/BS2//BS1+ZPE<br>+Bulk Polarity |        |
|---------------------------------|----------------|--------|----------------|--------|-----------------|--------|---------------------|--------|-----------------------------------|--------|---------------------------------------|--------|
|                                 | AE             | RE     | AE             | RE     | AE              | RE     | AE                  | RE     | AE                                | RE     | AE                                    | RE     |
| <sup>2</sup> RC <sub>B</sub>    | -2348.25616600 | 0.00   | -2347.78953100 | 0.00   | -2349.26933500  | 0.00   | -2348.80270000      | 0.00   | -2349.28974400                    | 0.00   | -2348.82310900                        | 0.00   |
| <sup>4</sup> RC <sub>B</sub>    | -2348.25624200 | -0.05  | -2347.78953200 | 0.00   | -2349.26924600  | 0.06   | -2348.80253600      | 0.10   | -2349.28967000                    | 0.05   | -2348.82296000                        | 0.09   |
| <sup>2</sup> TS-O <sub>B</sub>  | -2348.22892500 | 17.09  | -2347.76346100 | 16.36  | -2349.24361400  | 16.14  | -2348.77815000      | 15.41  | -2349.26576000                    | 15.05  | -2348.80029600                        | 14.32  |
| <sup>4</sup> TS-O <sub>B</sub>  | -2348.22716000 | 18.20  | -2347.76134800 | 17.69  | -2349.24311200  | 16.46  | -2348.77730000      | 15.94  | -2349.26337000                    | 16.55  | -2348.79755800                        | 16.03  |
| <sup>2</sup> INT <sub>B</sub>   | -2348.27558100 | -12.18 | -2347.80661500 | -10.72 | -2349.31227500  | -26.95 | -2348.84330900      | -25.48 | -2349.331456                      | -26.17 | -2348.86249000                        | -24.71 |
| <sup>4</sup> INT <sub>B</sub>   | -2348.27412200 | -11.27 | -2347.80680200 | -10.84 | -2349.29047810  | -13.27 | -2348.82315810      | -12.84 | -2349.309145                      | -12.17 | -2348.84182500                        | -11.74 |
| <sup>2</sup> P-epo <sub>B</sub> | -2348.27719900 | -13.20 | -2347.80839500 | -11.84 | -2349.31641200  | -29.54 | -2348.84760800      | -28.18 | -2349.335972                      | -29.01 | -2348.86716810                        | -27.65 |
| <sup>4</sup> P-epo <sub>B</sub> | -2348.25089400 | 3.31   | -2347.78447500 | 3.17   | -2349.29110100  | -13.66 | -2348.82468200      | -13.79 | -2349.312442                      | -14.24 | -2348.84602300                        | -14.38 |

**Table S3. Relative energies (RE) (in kcal/mol) and atomic energies (in a.u.) at the B3LYP level of theory for the MBI of P450 by 8-MP through C4'=C5' epoxidation (Path C).**

|                                | UB3LYP/BS1     |        | UB3LYP/BS1+ZPE |        | UB3LYP/BS2//BS1 |        | UB3LYP/BS2//BS1+ZPE |        | UB3LYP/BS2//BS1<br>+Bulk Polarity |        | UB3LYP/BS2//BS1+ZPE+<br>Bulk Polarity |        |
|--------------------------------|----------------|--------|----------------|--------|-----------------|--------|---------------------|--------|-----------------------------------|--------|---------------------------------------|--------|
|                                | AE             | RE     | AE             | RE     | AE              | RE     | AE                  | RE     | AE                                | RE     | AE                                    | RE     |
| <sup>2</sup> RC <sub>C</sub>   | -2348.25429000 | 0.00   | -2347.78769300 | 0.00   | -2349.26984200  | 0.00   | -2348.80324500      | 0.00   | -2349.29278500                    | 0.00   | -2348.82618800                        | 0.00   |
| <sup>4</sup> RC <sub>C</sub>   | -2348.25420700 | 0.05   | -2347.78767700 | 0.01   | -2349.26963800  | 0.13   | -2348.80310800      | 0.09   | -2349.29262200                    | 0.10   | -2348.82609200                        | 0.06   |
| <sup>2</sup> TS-O <sub>C</sub> | -2348.23212800 | 13.91  | -2347.76664600 | 13.21  | -2349.24836700  | 13.48  | -2348.78288500      | 12.78  | -2349.27086100                    | 13.76  | -2348.80537900                        | 13.06  |
| <sup>4</sup> TS-O <sub>C</sub> | -2348.23269600 | 13.55  | -2347.76677100 | 13.13  | -2349.24994600  | 12.48  | -2348.78402100      | 12.06  | -2349.27096400                    | 13.69  | -2348.80503900                        | 13.27  |
| <sup>2</sup> INT <sub>C</sub>  | -2348.28283400 | -17.91 | -2347.81413900 | -16.60 | -2349.31473900  | -28.17 | -2348.84604400      | -26.86 | -2349.337247                      | -27.90 | -2348.86855200                        | -26.58 |
| <sup>4</sup> INT <sub>C</sub>  | -2348.26348700 | -5.77  | -2347.79768900 | -6.27  | -2349.28867300  | -11.82 | -2348.82287500      | -12.32 | -2349.310033                      | -10.82 | -2348.84423500                        | -11.32 |
| <sup>2</sup> P-epoc            | -2348.28322500 | -18.16 | -2347.81442100 | -16.77 | -2349.31972200  | -31.30 | -2348.85091800      | -29.92 | -2349.340873                      | -30.18 | -2348.87206900                        | -28.79 |
| <sup>4</sup> P-epoc            | -2348.26000500 | -3.59  | -2347.79348800 | -3.64  | -2349.29898100  | -18.29 | -2348.83246400      | -18.34 | -2349.321029                      | -17.72 | -2348.85451200                        | -17.77 |

**Table S4. Relative energies (RE) (in kcal/mol) and atomic energies (in a.u.) at the B3LYP level of theory for the MBI of P450 by 8-MP through C4'=C5' epoxidation directed by phenylalanine.**

|                                 | UB3LYP/BS1     |        | UB3LYP/BS1+ZPE |        | UB3LYP/BS2//BS1 |        | UB3LYP/BS2//BS1+ZPE |        | UB3LYP/BS2//BS1<br>+Bulk Polarity |        | UB3LYP/BS2//BS1+ZPE+<br>Bulk Polarity |        |
|---------------------------------|----------------|--------|----------------|--------|-----------------|--------|---------------------|--------|-----------------------------------|--------|---------------------------------------|--------|
|                                 | AE             | RE     | AE             | RE     | AE              | RE     | AE                  | RE     | AE                                | RE     | AE                                    | RE     |
| <sup>2</sup> RC <sub>ph</sub>   | -2902.91079900 | 0.00   | -2902.25231500 | 0.00   | -2904.24097400  | 0.00   | -2903.58249000      | 0.00   | -2904.26585800                    | 0.00   | -2903.60737400                        | 0.00   |
| <sup>4</sup> RC <sub>ph</sub>   | -2902.91046100 | 0.21   | -2902.25197300 | 0.21   | -2904.24059400  | 0.24   | -2903.58210600      | 0.24   | -2904.26552000                    | 0.21   | -2903.60703200                        | 0.21   |
| <sup>2</sup> TS-O <sub>ph</sub> | -2902.89136000 | 12.20  | -2902.23419000 | 11.37  | -2904.21910400  | 13.72  | -2903.56193400      | 12.90  | -2904.24520000                    | 12.96  | -2903.58803000                        | 12.14  |
| <sup>4</sup> TS-O <sub>ph</sub> | -2902.88865300 | 13.90  | -2902.23215300 | 12.65  | -2904.21844000  | 14.14  | -2903.56194000      | 12.90  | -2904.24485600                    | 13.18  | -2903.58835600                        | 11.93  |
| <sup>2</sup> INT <sub>ph</sub>  | -2902.92467900 | -8.71  | -2902.26374500 | -7.17  | -2904.27935500  | -24.08 | -2903.61842100      | -22.55 | -2904.304481                      | -24.24 | -2903.64354700                        | -22.70 |
| <sup>4</sup> INT <sub>ph</sub>  | -2902.92920600 | -11.55 | -2902.26981900 | -10.98 | -2904.25491300  | -8.75  | -2903.59552600      | -8.18  | -2904.284211                      | -11.52 | -2903.62482400                        | -10.95 |
| <sup>2</sup> P <sub>ph</sub>    | -2902.93007600 | -12.10 | -2902.26959800 | -10.85 | -2904.28200300  | -25.75 | -2903.62152500      | -24.49 | -2904.306954                      | -25.79 | -2903.64647600                        | -24.54 |
| <sup>4</sup> P <sub>ph</sub>    | -2902.91841400 | -4.78  | -2902.25957200 | -4.55  | -2904.28258200  | -26.11 | -2903.62374000      | -25.88 | -2904.311705                      | -28.77 | -2903.65286300                        | -28.54 |

**Table S5. Relative energies (RE) (in kcal/mol) and atomic energies (in a.u.) at the B3LYP level of theory for various mechanisms of reactive metabolites reactions of 8-MP epoxide**

| OMe addition                     | EE+ZPE (6-311G**) | RE (kcal/mol) | SP EE (6-311+G**) (SCRF=chlorobenzene) | SP EE(SCRF)+ZPE | RE (kcal/mol) |
|----------------------------------|-------------------|---------------|----------------------------------------|-----------------|---------------|
| epoxide+HOMe                     | -953.878719       | 0.00          | -954.152311                            | -953.922        | 0.00          |
| TS <sub>OMe</sub>                | -953.832932       | 28.73         | -954.104811                            | -953.875        | 29.53         |
| P <sub>OMe</sub>                 | -953.913907       | -22.08        | -954.18727                             | -953.952        | -19.39        |
| <b>SMe addition</b>              |                   |               |                                        |                 |               |
| epoxide+HSMe                     | -1276.869132      | 0.00          | -1277.128964                           | -1276.9         | 0.00          |
| TS <sub>SMe</sub>                | -1276.810965      | 36.50         | -1277.073203                           | -1276.85        | 33.68         |
| P <sub>SMe</sub>                 | -1276.905445      | -22.79        | -1277.16977                            | -1276.94        | -22.07        |
| <b>Phenylalanine addition</b>    |                   |               |                                        |                 |               |
| epoxide+phe                      | -1392.929024      | 0.00          | -1393.350828                           | -1392.98        | 0.00          |
| TS <sub>Phe</sub>                | -1392.891489      | 23.55         | -1393.316239                           | -1392.94        | 25.71         |
| P <sub>Phe</sub>                 | -1392.965362      | -22.80        | -1393.381634                           | -1393.01        | -16.90        |
| <b>Nonenzymatic Ring opening</b> |                   |               |                                        |                 |               |
| epoxide                          | -838.172441       | 0.00          | -838.382959                            | -838.203        | 0.00          |
| TS <sub>ro</sub>                 | -838.146167       | 16.49         | -838.358035                            | -838.181        | 13.79         |
| P <sub>ro</sub>                  | -838.159207       | 8.30          | -838.368675                            | -838.191        | 7.69          |
| <b>Diol formation pathway</b>    |                   |               |                                        |                 |               |
| epoxide+HOH                      | -914.598564       | 0.00          | -914.84745                             | -914.647        | 0.00          |
| TS <sub>diol</sub>               | -914.54992        | 30.52         | -914.798918                            | -914.597        | 31.00         |
| P <sub>diol</sub>                | -914.641697       | -27.07        | -914.886673                            | -914.679        | -20.39        |
| TS <sub>r1</sub>                 | -914.527504       | 44.59         | -914.76621                             | -914.564        | 51.71         |
| P <sub>r2</sub>                  | -914.634892       | -22.80        | -914.873837                            | -914.668        | -13.61        |
| TS <sub>r2</sub>                 | -914.574756       | 14.94         | -914.812524                            | -914.612        | 21.90         |
| P <sub>r2</sub>                  | -914.641915       | -27.20        | -914.885567                            | -914.68         | -21.25        |

## Cartesian coordinates of all structures represented in this study.

### Path A

#### <sup>2</sup>RC<sub>A</sub>

|    |          |          |          |
|----|----------|----------|----------|
| Fe | -2.18908 | -0.13058 | 0.03266  |
| O  | -1.12155 | 0.79172  | 0.89202  |
| S  | -3.70858 | -1.42718 | -1.61732 |
| H  | -2.88099 | -2.51305 | -1.83294 |
| N  | -1.39793 | -1.87803 | 0.6561   |
| C  | 0.01648  | -3.69713 | 0.91836  |
| C  | -0.86818 | -3.72374 | 1.95913  |
| H  | 0.81917  | -4.38579 | 0.69926  |
| H  | -0.93367 | -4.43869 | 2.76631  |
| N  | -3.55581 | -0.22267 | 1.50691  |
| C  | -3.61283 | -1.15376 | 2.52943  |
| C  | -4.6843  | -0.822   | 3.44262  |
| C  | -5.27501 | 0.31441  | 2.9671   |
| H  | -4.93997 | -1.39346 | 4.32292  |
| H  | -6.11163 | 0.85929  | 3.37941  |
| N  | -3.15893 | 1.45432  | -0.76022 |
| C  | -4.23404 | 2.13458  | -0.20273 |
| C  | -2.82031 | 2.15219  | -1.90676 |
| C  | -4.57512 | 3.27539  | -1.02436 |
| C  | -3.70207 | 3.28764  | -2.07383 |
| H  | -5.38066 | 3.96351  | -0.81354 |
| H  | -3.65062 | 3.98728  | -2.89521 |
| N  | -1.01857 | -0.20994 | -1.61356 |
| C  | 0.12096  | 0.38605  | -3.55117 |
| H  | 0.3755   | 0.95306  | -4.43452 |
| C  | -0.9599  | 0.72154  | -2.64814 |
| C  | -0.31584 | -2.54491 | 0.10952  |
| C  | -1.74542 | -2.58506 | 1.79721  |
| C  | -4.56888 | 0.68287  | 1.75968  |
| C  | -1.79167 | 1.81854  | -2.77797 |
| H  | -1.63509 | 2.46504  | -3.63494 |
| C  | 0.35502  | -2.17968 | -1.05262 |
| H  | 1.20416  | -2.77859 | -1.36405 |
| C  | -2.77541 | -2.2522  | 2.66269  |
| H  | -2.93736 | -2.90075 | 3.51731  |
| C  | -4.88461 | 1.77863  | 0.9656   |
| H  | -5.71221 | 2.40296  | 1.28594  |
| C  | 0.73092  | -0.73015 | -3.05926 |
| H  | 1.5945   | -1.25953 | -3.43142 |
| C  | 0.02653  | -1.09986 | -1.85102 |
| C  | 5.55419  | 1.56444  | 1.69137  |
| C  | 6.11352  | 0.31081  | 1.44705  |
| C  | 5.49968  | -0.51661 | 0.48814  |

|                                   |          |          |          |
|-----------------------------------|----------|----------|----------|
| C                                 | 4.34035  | -0.07313 | -0.2024  |
| C                                 | 3.75982  | 1.19223  | 0.00688  |
| C                                 | 4.4049   | 1.97399  | 0.96876  |
| H                                 | 6.88831  | -2.1807  | 0.67429  |
| H                                 | 6.9978   | -0.03105 | 1.97303  |
| C                                 | 5.99381  | -1.83378 | 0.16537  |
| C                                 | 4.16447  | -2.20687 | -1.4208  |
| C                                 | 5.37192  | -2.63338 | -0.73996 |
| H                                 | 5.73214  | -3.62391 | -0.9843  |
| O                                 | 3.7168   | -0.90013 | -1.12936 |
| O                                 | 3.48861  | -2.87384 | -2.21482 |
| O                                 | 2.70236  | 1.56682  | -0.77574 |
| C                                 | 1.59267  | 2.35573  | -0.19238 |
| H                                 | 0.97787  | 2.61954  | -1.05037 |
| H                                 | 1.97246  | 3.24969  | 0.30339  |
| O                                 | 4.04386  | 3.26432  | 1.35813  |
| C                                 | 4.979    | 3.65322  | 2.33999  |
| H                                 | 4.82505  | 4.63807  | 2.74466  |
| C                                 | 5.89025  | 2.67518  | 2.56509  |
| H                                 | 6.71164  | 2.71679  | 3.26302  |
| H                                 | 1.00969  | 1.73237  | 0.48962  |
| <b><sup>4</sup>RC<sub>A</sub></b> |          |          |          |
| Fe                                | -2.18304 | -0.1332  | 0.02461  |
| O                                 | -1.13072 | 0.78576  | 0.91087  |
| S                                 | -3.71159 | -1.43731 | -1.58033 |
| H                                 | -2.88165 | -2.51864 | -1.80883 |
| N                                 | -1.3909  | -1.87518 | 0.66539  |
| C                                 | 0.02399  | -3.69129 | 0.94569  |
| C                                 | -0.86583 | -3.71258 | 1.98209  |
| H                                 | 0.82847  | -4.38038 | 0.73469  |
| H                                 | -0.93439 | -4.42253 | 2.79342  |
| N                                 | -3.55067 | -0.21144 | 1.50523  |
| C                                 | -3.60972 | -1.1368  | 2.53216  |
| C                                 | -4.67669 | -0.79418 | 3.44716  |
| C                                 | -5.26192 | 0.34339  | 2.96783  |
| H                                 | -4.93266 | -1.35933 | 4.33143  |
| H                                 | -6.09375 | 0.89558  | 3.3801   |
| N                                 | -3.14922 | 1.44886  | -0.77432 |
| C                                 | -4.22293 | 2.13488  | -0.22001 |
| C                                 | -2.81657 | 2.13347  | -1.93043 |
| C                                 | -4.56721 | 3.26649  | -1.05292 |
| C                                 | -3.69902 | 3.26682  | -2.10652 |
| H                                 | -5.37203 | 3.95677  | -0.84646 |
| H                                 | -3.65142 | 3.95699  | -2.93609 |
| N                                 | -1.01104 | -0.22279 | -1.61291 |
| C                                 | 0.11657  | 0.34644  | -3.5657  |

|                                     |          |          |          |
|-------------------------------------|----------|----------|----------|
| H                                   | 0.36579  | 0.90143  | -4.45815 |
| C                                   | -0.95941 | 0.69371  | -2.66156 |
| C                                   | -0.30639 | -2.54477 | 0.12787  |
| C                                   | -1.7436  | -2.57567 | 1.80922  |
| C                                   | -4.5575  | 0.70083  | 1.75577  |
| C                                   | -1.79133 | 1.78926  | -2.8016  |
| H                                   | -1.63831 | 2.42487  | -3.66732 |
| C                                   | 0.36441  | -2.18784 | -1.03686 |
| H                                   | 1.21406  | -2.78815 | -1.34412 |
| C                                   | -2.77607 | -2.23774 | 2.66973  |
| H                                   | -2.94083 | -2.88239 | 3.5268   |
| C                                   | -4.87097 | 1.79133  | 0.95344  |
| H                                   | -5.69592 | 2.42103  | 1.27012  |
| C                                   | 0.72989  | -0.76252 | -3.06188 |
| H                                   | 1.59173  | -1.29654 | -3.43148 |
| C                                   | 0.03212  | -1.11671 | -1.84532 |
| C                                   | 5.5421   | 1.58496  | 1.68231  |
| C                                   | 6.10826  | 0.33328  | 1.44391  |
| C                                   | 5.49743  | -0.50304 | 0.49081  |
| C                                   | 4.33419  | -0.07023 | -0.19986 |
| C                                   | 3.74646  | 1.19275  | 0.00379  |
| C                                   | 4.38894  | 1.98377  | 0.95984  |
| H                                   | 6.89625  | -2.15786 | 0.68334  |
| H                                   | 6.9956   | -0.00042 | 1.96997  |
| C                                   | 5.99887  | -1.81891 | 0.1741   |
| C                                   | 4.16942  | -2.21112 | -1.40732 |
| C                                   | 5.38041  | -2.62687 | -0.72614 |
| H                                   | 5.74624  | -3.61643 | -0.96601 |
| O                                   | 3.71395  | -0.90578 | -1.12132 |
| O                                   | 3.4966   | -2.886   | -2.19719 |
| O                                   | 2.68479  | 1.55594  | -0.77855 |
| C                                   | 1.5745   | 2.3469   | -0.19965 |
| H                                   | 0.95631  | 2.60056  | -1.05825 |
| H                                   | 1.95279  | 3.24667  | 0.28657  |
| O                                   | 4.02134  | 3.27422  | 1.34268  |
| C                                   | 4.95632  | 3.67409  | 2.32028  |
| H                                   | 4.79757  | 4.66036  | 2.71962  |
| C                                   | 5.87362  | 2.70258  | 2.54898  |
| H                                   | 6.69626  | 2.75285  | 3.24486  |
| H                                   | 0.99574  | 1.72836  | 0.49044  |
| <b><sup>2</sup>TS-H<sub>A</sub></b> |          |          |          |
| Fe                                  | 1.92662  | -0.25835 | -0.11892 |
| O                                   | 0.83939  | 1.15127  | 0.02999  |
| S                                   | 3.41603  | -2.1279  | -0.77325 |
| H                                   | 2.67834  | -3.16599 | -0.23445 |
| N                                   | 0.60606  | -1.30169 | -1.23265 |

|   |          |          |          |
|---|----------|----------|----------|
| C | -1.15738 | -2.66274 | -1.89514 |
| C | -0.68641 | -2.0393  | -3.0152  |
| H | -1.96879 | -3.36892 | -1.80082 |
| H | -1.03472 | -2.13817 | -4.03318 |
| N | 2.6524   | 0.62056  | -1.79784 |
| C | 2.15543  | 0.49299  | -3.07904 |
| C | 2.89836  | 1.34576  | -3.98822 |
| C | 3.84967  | 1.98413  | -3.24736 |
| H | 2.70833  | 1.42599  | -5.04866 |
| H | 4.59459  | 2.69298  | -3.57866 |
| N | 3.38697  | 0.60864  | 0.96023  |
| C | 4.33835  | 1.50139  | 0.50491  |
| C | 3.60639  | 0.47484  | 2.31914  |
| C | 5.17723  | 1.93376  | 1.60209  |
| C | 4.7255   | 1.2976   | 2.7243   |
| H | 5.99888  | 2.62918  | 1.51062  |
| H | 5.10316  | 1.36916  | 3.73392  |
| N | 1.26469  | -1.21814 | 1.52262  |
| C | 1.00136  | -1.92578 | 3.72155  |
| H | 1.1926   | -2.01333 | 4.78129  |
| C | 1.77082  | -1.10356 | 2.81148  |
| C | -0.36077 | -2.19256 | -0.78235 |
| C | 0.40366  | -1.18017 | -2.60355 |
| C | 3.69367  | 1.52932  | -1.87892 |
| C | 2.85773  | -0.32224 | 3.17633  |
| H | 3.14743  | -0.33325 | 4.22236  |
| C | -0.55782 | -2.55717 | 0.54026  |
| H | -1.38489 | -3.22614 | 0.75101  |
| C | 1.10953  | -0.34189 | -3.4507  |
| H | 0.825    | -0.34454 | -4.49805 |
| C | 4.47891  | 1.93135  | -0.81074 |
| H | 5.27317  | 2.64198  | -1.01602 |
| C | 0.0336   | -2.54361 | 2.98095  |
| H | -0.72934 | -3.23291 | 3.31113  |
| C | 0.20733  | -2.11116 | 1.61145  |
| C | -4.58919 | 2.7192   | -0.10057 |
| C | -5.41915 | 1.74495  | -0.65407 |
| C | -5.09767 | 0.39155  | -0.44015 |
| C | -3.95293 | 0.04142  | 0.32245  |
| C | -3.10337 | 1.00243  | 0.90032  |
| C | -3.45834 | 2.33133  | 0.6619   |
| H | -6.77486 | -0.44233 | -1.54758 |
| H | -6.29382 | 2.00897  | -1.23765 |
| C | -5.88721 | -0.69309 | -0.97454 |
| C | -4.35327 | -2.36243 | -0.04229 |
| C | -5.54422 | -1.99324 | -0.7843  |



|   |          |          |          |
|---|----------|----------|----------|
| H | -6.12515 | -2.8116  | -1.18858 |
| O | -3.62088 | -1.28843 | 0.52343  |
| O | -3.91271 | -3.50212 | 0.13568  |
| O | -2.0623  | 0.54761  | 1.67271  |
| C | -0.87852 | 1.29849  | 1.89853  |
| H | -0.36061 | 0.86087  | 2.74505  |
| H | -1.00534 | 2.37815  | 1.89001  |
| O | -2.79768 | 3.46566  | 1.12766  |
| C | -3.52498 | 4.57302  | 0.63926  |
| H | -3.12374 | 5.53206  | 0.9154   |
| C | -4.59351 | 4.17164  | -0.09119 |
| H | -5.31221 | 4.81342  | -0.5758  |
| H | 0.04916  | 1.11307  | 0.82079  |

**<sup>4</sup>TS-H<sub>A</sub>**

|    |          |          |          |
|----|----------|----------|----------|
| Fe | 1.94896  | -0.27503 | -0.17358 |
| O  | 0.78626  | 1.03688  | 0.00445  |
| S  | 3.45094  | -2.13729 | -0.16406 |
| H  | 2.62342  | -3.05513 | -0.78198 |
| N  | 0.96794  | -1.05052 | -1.73921 |
| C  | -0.58659 | -2.17043 | -3.04361 |
| C  | 0.22866  | -1.47647 | -3.8929  |
| H  | -1.42132 | -2.81113 | -3.28832 |
| H  | 0.19088  | -1.43124 | -4.97164 |
| N  | 3.07179  | 0.81917  | -1.39437 |
| C  | 3.0089   | 0.85584  | -2.7793  |
| C  | 3.97822  | 1.80263  | -3.28995 |
| C  | 4.62654  | 2.33376  | -2.21321 |
| H  | 4.12936  | 2.01837  | -4.33767 |
| H  | 5.4182   | 3.06884  | -2.20235 |
| N  | 3.04362  | 0.3375   | 1.41189  |
| C  | 4.05174  | 1.28419  | 1.39299  |
| C  | 2.89645  | -0.05    | 2.73706  |
| C  | 4.55729  | 1.48883  | 2.73243  |
| C  | 3.84874  | 0.66309  | 3.55953  |
| H  | 5.35184  | 2.1742   | 2.98951  |
| H  | 3.94693  | 0.54019  | 4.62837  |
| N  | 0.83637  | -1.44468 | 1.08709  |
| C  | -0.0259  | -2.48071 | 2.97472  |
| H  | -0.12949 | -2.75258 | 4.01513  |
| C  | 0.99226  | -1.58743 | 2.45794  |
| C  | -0.1292  | -1.90386 | -1.69781 |
| C  | 1.18823  | -0.76708 | -3.07625 |
| C  | 4.07086  | 1.71057  | -1.02988 |
| C  | 1.95346  | -0.94535 | 3.22274  |
| H  | 1.96233  | -1.14801 | 4.28852  |
| C  | -0.7035  | -2.43829 | -0.55443 |

|                                    |          |          |          |
|------------------------------------|----------|----------|----------|
| H                                  | -1.56673 | -3.08333 | -0.67301 |
| C                                  | 2.14864  | 0.10768  | -3.56412 |
| H                                  | 2.21026  | 0.23546  | -4.63951 |
| C                                  | 4.51996  | 1.93582  | 0.26003  |
| H                                  | 5.31869  | 2.65766  | 0.3931   |
| C                                  | -0.7953  | -2.87124 | 1.91719  |
| H                                  | -1.66943 | -3.50466 | 1.90395  |
| C                                  | -0.2447  | -2.234   | 0.7385   |
| C                                  | -4.55296 | 2.73907  | -0.25064 |
| C                                  | -5.39217 | 1.75327  | -0.76883 |
| C                                  | -5.10042 | 0.40662  | -0.48175 |
| C                                  | -3.97583 | 0.07453  | 0.31785  |
| C                                  | -3.1185  | 1.04848  | 0.86281  |
| C                                  | -3.44326 | 2.36987  | 0.55105  |
| H                                  | -6.77357 | -0.4519  | -1.57679 |
| H                                  | -6.25135 | 2.00344  | -1.38084 |
| C                                  | -5.90085 | -0.68929 | -0.97578 |
| C                                  | -4.41553 | -2.33763 | 0.06755  |
| C                                  | -5.58599 | -1.98421 | -0.71425 |
| H                                  | -6.1759  | -2.81115 | -1.08687 |
| O                                  | -3.66958 | -1.24885 | 0.58741  |
| O                                  | -4.00181 | -3.47435 | 0.31287  |
| O                                  | -2.10087 | 0.61296  | 1.67472  |
| C                                  | -0.90422 | 1.34848  | 1.88952  |
| H                                  | -0.40939 | 0.93055  | 2.76078  |
| H                                  | -1.01462 | 2.42986  | 1.84836  |
| O                                  | -2.76748 | 3.51369  | 0.96913  |
| C                                  | -3.46408 | 4.60806  | 0.41104  |
| H                                  | -3.04827 | 5.5723   | 0.64418  |
| C                                  | -4.5281  | 4.18982  | -0.31653 |
| H                                  | -5.22523 | 4.81921  | -0.84678 |
| H                                  | 0.01799  | 1.08587  | 0.84323  |
| <b><sup>2</sup>INT<sub>A</sub></b> |          |          |          |
| Fe                                 | -2.18995 | 0.0868   | 0.01941  |
| O                                  | -1.14207 | -0.82774 | -0.8719  |
| S                                  | -3.77898 | 1.79449  | 1.14908  |
| H                                  | -2.84766 | 2.42287  | 1.95444  |
| N                                  | -1.38644 | 1.84387  | -0.58409 |
| C                                  | 0.05408  | 3.65049  | -0.82482 |
| C                                  | -0.81277 | 3.68484  | -1.87902 |
| H                                  | 0.85958  | 4.33224  | -0.59464 |
| H                                  | -0.85806 | 4.40159  | -2.68594 |
| N                                  | -3.55506 | 0.22404  | -1.4629  |
| C                                  | -3.57551 | 1.14735  | -2.49496 |
| C                                  | -4.64513 | 0.83418  | -3.41782 |
| C                                  | -5.27177 | -0.28135 | -2.94148 |

|   |          |          |          |
|---|----------|----------|----------|
| H | -4.87592 | 1.40611  | -4.30462 |
| H | -6.11787 | -0.80629 | -3.36032 |
| N | -3.18937 | -1.48151 | 0.78803  |
| C | -4.27409 | -2.13256 | 0.22827  |
| C | -2.88052 | -2.1787  | 1.94204  |
| C | -4.65139 | -3.263   | 1.0479   |
| C | -3.79011 | -3.29112 | 2.10809  |
| H | -5.47098 | -3.9323  | 0.83085  |
| H | -3.76363 | -3.98816 | 2.93288  |
| N | -1.0022  | 0.12425  | 1.64591  |
| C | 0.11275  | -0.49784 | 3.58715  |
| H | 0.34973  | -1.07082 | 4.47161  |
| C | -0.9753  | -0.80092 | 2.68007  |
| C | -0.29185 | 2.49763  | -0.02356 |
| C | -1.70387 | 2.55455  | -1.73789 |
| C | -4.58887 | -0.66379 | -1.72489 |
| C | -1.85277 | -1.86309 | 2.82173  |
| H | -1.72483 | -2.50352 | 3.68821  |
| C | 0.38131  | 2.09614  | 1.11716  |
| H | 1.23666  | 2.67909  | 1.44164  |
| C | -2.70942 | 2.22315  | -2.62826 |
| H | -2.84021 | 2.86339  | -3.49419 |
| C | -4.92236 | -1.75516 | -0.94009 |
| H | -5.76134 | -2.36306 | -1.26241 |
| C | 0.75008  | 0.60422  | 3.09582  |
| H | 1.62257  | 1.11717  | 3.47022  |
| C | 0.04864  | 0.99076  | 1.89022  |
| C | 5.56508  | -1.51928 | -1.72883 |
| C | 6.12796  | -0.2739  | -1.45241 |
| C | 5.51613  | 0.53033  | -0.47267 |
| C | 4.35546  | 0.07218  | 0.20574  |
| C | 3.77179  | -1.18611 | -0.03517 |
| C | 4.41469  | -1.94453 | -1.01694 |
| H | 6.90944  | 2.19486  | -0.61468 |
| H | 7.01328  | 0.07879  | -1.96938 |
| C | 6.0137   | 1.83729  | -0.11539 |
| C | 4.18429  | 2.17441  | 1.47861  |
| C | 5.3937   | 2.61483  | 0.8103   |
| H | 5.75671  | 3.59758  | 1.08056  |
| O | 3.7332   | 0.87698  | 1.15277  |
| O | 3.5084   | 2.82201  | 2.28844  |
| O | 2.71425  | -1.57652 | 0.73922  |
| C | 1.60487  | -2.35574 | 0.14289  |
| H | 0.98968  | -2.63294 | 0.99631  |
| H | 1.0218   | -1.72185 | -0.52915 |
| H | 1.98466  | -3.24157 | -0.36728 |

|                                    |          |          |          |
|------------------------------------|----------|----------|----------|
| O                                  | 4.0504   | -3.22343 | -1.43958 |
| C                                  | 4.98451  | -3.5891  | -2.4313  |
| H                                  | 4.82799  | -4.5627  | -2.86142 |
| C                                  | 5.89827  | -2.60791 | -2.631   |
| H                                  | 6.71952  | -2.63348 | -3.32986 |
| <b><sup>4</sup>INT<sub>A</sub></b> |          |          |          |
| Fe                                 | -2.17612 | 0.22884  | 0.02743  |
| O                                  | -1.03346 | -0.92868 | -0.76203 |
| S                                  | -3.69241 | 1.66945  | 1.11139  |
| H                                  | -3.18365 | 2.86951  | 0.65374  |
| N                                  | -1.30965 | 1.82204  | -0.85432 |
| C                                  | 0.14307  | 3.55367  | -1.35359 |
| C                                  | -0.72011 | 3.43391  | -2.40665 |
| H                                  | 0.95558  | 4.25423  | -1.22691 |
| H                                  | -0.75305 | 4.01522  | -3.3167  |
| N                                  | -3.41239 | 0.02471  | -1.54    |
| C                                  | -3.42368 | 0.78922  | -2.69481 |
| C                                  | -4.45043 | 0.30117  | -3.59022 |
| C                                  | -5.06122 | -0.74943 | -2.96762 |
| H                                  | -4.66474 | 0.72258  | -4.56158 |
| H                                  | -5.87719 | -1.35973 | -3.32638 |
| N                                  | -3.15566 | -1.23128 | 1.00633  |
| C                                  | -4.21151 | -1.98445 | 0.51799  |
| C                                  | -2.8731  | -1.72287 | 2.27215  |
| C                                  | -4.61006 | -2.95836 | 1.50912  |
| C                                  | -3.78872 | -2.79582 | 2.58904  |
| H                                  | -5.41398 | -3.6681  | 1.37871  |
| H                                  | -3.78619 | -3.34617 | 3.51865  |
| N                                  | -0.90611 | 0.41745  | 1.59406  |
| C                                  | 0.12395  | 0.16085  | 3.6533   |
| H                                  | 0.32307  | -0.24157 | 4.63593  |
| C                                  | -0.93764 | -0.29821 | 2.78297  |
| C                                  | -0.21551 | 2.53981  | -0.38833 |
| C                                  | -1.61699 | 2.34208  | -2.1025  |
| C                                  | -4.41895 | -0.91547 | -1.6816  |
| C                                  | -1.84875 | -1.29212 | 3.10153  |
| H                                  | -1.7555  | -1.76736 | 4.07186  |
| C                                  | 0.45756  | 2.3174   | 0.80299  |
| H                                  | 1.30049  | 2.95522  | 1.04294  |
| C                                  | -2.60046 | 1.87064  | -2.95799 |
| H                                  | -2.72572 | 2.3795   | -3.90737 |
| C                                  | -4.79462 | -1.8498  | -0.73147 |
| H                                  | -5.61255 | -2.51751 | -0.97827 |
| C                                  | 0.78305  | 1.16171  | 2.99853  |
| H                                  | 1.64183  | 1.7354   | 3.31244  |
| C                                  | 0.12629  | 1.33664  | 1.72222  |

|                                       |          |          |          |
|---------------------------------------|----------|----------|----------|
| C                                     | 5.27565  | -1.88807 | -1.59322 |
| C                                     | 5.94959  | -0.67389 | -1.46456 |
| C                                     | 5.44824  | 0.27817  | -0.5566  |
| C                                     | 4.28526  | -0.00508 | 0.205    |
| C                                     | 3.59391  | -1.22563 | 0.10222  |
| C                                     | 4.11882  | -2.13872 | -0.81256 |
| H                                     | 6.96349  | 1.79798  | -0.9188  |
| H                                     | 6.83809  | -0.45406 | -2.04542 |
| C                                     | 6.06487  | 1.56866  | -0.35402 |
| C                                     | 4.34161  | 2.21858  | 1.26543  |
| C                                     | 5.5503   | 2.48399  | 0.50718  |
| H                                     | 6.00284  | 3.45485  | 0.65974  |
| O                                     | 3.77279  | 0.9305   | 1.08703  |
| O                                     | 3.76042  | 2.99045  | 2.03275  |
| O                                     | 2.50778  | -1.40258 | 0.92754  |
| C                                     | 1.51612  | -2.35996 | 0.72447  |
| H                                     | 0.85471  | -2.43046 | 1.57397  |
| H                                     | -0.23453 | -1.16588 | -0.23437 |
| H                                     | 1.67766  | -3.14674 | 0.00256  |
| O                                     | 3.62532  | -3.40936 | -1.10011 |
| C                                     | 4.48841  | -3.95351 | -2.0775  |
| H                                     | 4.22762  | -4.94377 | -2.40675 |
| C                                     | 5.47767  | -3.08319 | -2.39392 |
| H                                     | 6.26763  | -3.24887 | -3.10928 |
| <b><sup>4</sup>TS-reb<sub>A</sub></b> |          |          |          |
| Fe                                    | 1.94896  | -0.27503 | -0.17358 |
| O                                     | 0.78626  | 1.03688  | 0.00445  |
| S                                     | 3.45094  | -2.13729 | -0.16406 |
| H                                     | 2.62342  | -3.05513 | -0.78198 |
| N                                     | 0.96794  | -1.05052 | -1.73921 |
| C                                     | -0.58659 | -2.17043 | -3.04361 |
| C                                     | 0.22866  | -1.47647 | -3.8929  |
| H                                     | -1.42132 | -2.81113 | -3.28832 |
| H                                     | 0.19088  | -1.43124 | -4.97164 |
| N                                     | 3.07179  | 0.81917  | -1.39437 |
| C                                     | 3.0089   | 0.85584  | -2.7793  |
| C                                     | 3.97822  | 1.80263  | -3.28995 |
| C                                     | 4.62654  | 2.33376  | -2.21321 |
| H                                     | 4.12936  | 2.01837  | -4.33767 |
| H                                     | 5.4182   | 3.06884  | -2.20235 |
| N                                     | 3.04362  | 0.3375   | 1.41189  |
| C                                     | 4.05174  | 1.28419  | 1.39299  |
| C                                     | 2.89645  | -0.05    | 2.73706  |
| C                                     | 4.55729  | 1.48883  | 2.73243  |
| C                                     | 3.84874  | 0.66309  | 3.55953  |
| H                                     | 5.35184  | 2.1742   | 2.98951  |

|                                     |          |          |          |
|-------------------------------------|----------|----------|----------|
| H                                   | 3.94693  | 0.54019  | 4.62837  |
| N                                   | 0.83637  | -1.44468 | 1.08709  |
| C                                   | -0.0259  | -2.48071 | 2.97472  |
| H                                   | -0.12949 | -2.75258 | 4.01513  |
| C                                   | 0.99226  | -1.58743 | 2.45794  |
| C                                   | -0.1292  | -1.90386 | -1.69781 |
| C                                   | 1.18823  | -0.76708 | -3.07625 |
| C                                   | 4.07086  | 1.71057  | -1.02988 |
| C                                   | 1.95346  | -0.94535 | 3.22274  |
| H                                   | 1.96233  | -1.14801 | 4.28852  |
| C                                   | -0.7035  | -2.43829 | -0.55443 |
| H                                   | -1.56673 | -3.08333 | -0.67301 |
| C                                   | 2.14864  | 0.10768  | -3.56412 |
| H                                   | 2.21026  | 0.23546  | -4.63951 |
| C                                   | 4.51996  | 1.93582  | 0.26003  |
| H                                   | 5.31869  | 2.65766  | 0.3931   |
| C                                   | -0.7953  | -2.87124 | 1.91719  |
| H                                   | -1.66943 | -3.50466 | 1.90395  |
| C                                   | -0.2447  | -2.234   | 0.7385   |
| C                                   | -4.55296 | 2.73907  | -0.25064 |
| C                                   | -5.39217 | 1.75327  | -0.76883 |
| C                                   | -5.10042 | 0.40662  | -0.48175 |
| C                                   | -3.97583 | 0.07453  | 0.31785  |
| C                                   | -3.1185  | 1.04848  | 0.86281  |
| C                                   | -3.44326 | 2.36987  | 0.55105  |
| H                                   | -6.77357 | -0.4519  | -1.57679 |
| H                                   | -6.25135 | 2.00344  | -1.38084 |
| C                                   | -5.90085 | -0.68929 | -0.97578 |
| C                                   | -4.41553 | -2.33763 | 0.06755  |
| C                                   | -5.58599 | -1.98421 | -0.71425 |
| H                                   | -6.1759  | -2.81115 | -1.08687 |
| O                                   | -3.66958 | -1.24885 | 0.58741  |
| O                                   | -4.00181 | -3.47435 | 0.31287  |
| O                                   | -2.10087 | 0.61296  | 1.67472  |
| C                                   | -0.90422 | 1.34848  | 1.88952  |
| H                                   | -0.40939 | 0.93055  | 2.76078  |
| H                                   | -1.01462 | 2.42986  | 1.84836  |
| O                                   | -2.76748 | 3.51369  | 0.96913  |
| C                                   | -3.46408 | 4.60806  | 0.41104  |
| H                                   | -3.04827 | 5.5723   | 0.64418  |
| C                                   | -4.5281  | 4.18982  | -0.31653 |
| H                                   | -5.22523 | 4.81921  | -0.84678 |
| H                                   | 0.01799  | 1.08587  | 0.84323  |
| <b><sup>2</sup>P-OH<sub>A</sub></b> |          |          |          |
| Fe                                  | -1.91288 | 0.25528  | -0.38389 |
| O                                   | -0.38886 | -0.26595 | 0.98028  |

|   |          |          |          |
|---|----------|----------|----------|
| S | -3.61759 | 0.66614  | -1.85872 |
| H | -3.81781 | 2.00021  | -1.55856 |
| N | -0.99859 | 2.00223  | -0.78818 |
| C | -0.38475 | 4.24228  | -0.83071 |
| C | 0.30449  | 3.61625  | -1.82893 |
| H | -0.35137 | 5.28339  | -0.5443  |
| H | 1.01653  | 4.04321  | -2.51996 |
| N | -0.84117 | -0.68795 | -1.81185 |
| C | 0.04869  | -0.08126 | -2.6845  |
| C | 0.55894  | -1.05879 | -3.6241  |
| C | -0.03111 | -2.25307 | -3.32295 |
| H | 1.26851  | -0.84081 | -4.40928 |
| H | 0.0987   | -3.20755 | -3.81258 |
| N | -2.71642 | -1.5333  | 0.11531  |
| C | -2.54601 | -2.75719 | -0.51792 |
| C | -3.66098 | -1.74245 | 1.10967  |
| C | -3.38837 | -3.7551  | 0.10565  |
| C | -4.07479 | -3.13014 | 1.10859  |
| H | -3.44567 | -4.78951 | -0.20182 |
| H | -4.80335 | -3.55287 | 1.78547  |
| N | -2.88098 | 1.16459  | 1.13218  |
| C | -4.32678 | 1.54606  | 2.90559  |
| H | -5.05697 | 1.3341   | 3.67337  |
| C | -3.7927  | 0.56214  | 1.98632  |
| C | -1.19997 | 3.23691  | -0.18271 |
| C | -0.08062 | 2.22027  | -1.80496 |
| C | -0.90788 | -2.02054 | -2.19466 |
| C | -4.15114 | -0.77821 | 1.97857  |
| H | -4.88744 | -1.09768 | 2.70889  |
| C | -2.05433 | 3.47287  | 0.88465  |
| H | -2.11811 | 4.48683  | 1.26473  |
| C | 0.4056   | 1.2592   | -2.67805 |
| H | 1.12222  | 1.58556  | -3.42435 |
| C | -1.69818 | -2.9886  | -1.59214 |
| H | -1.66211 | -3.99366 | -1.99913 |
| C | -3.73928 | 2.74184  | 2.60321  |
| H | -3.89236 | 3.70227  | 3.07395  |
| C | -2.83917 | 2.50365  | 1.49518  |
| C | 3.60423  | -2.60607 | 0.91156  |
| C | 4.91489  | -2.18886 | 0.6866   |
| C | 5.16686  | -0.80997 | 0.56357  |
| C | 4.10599  | 0.12715  | 0.67242  |
| C | 2.77319  | -0.26538 | 0.90137  |
| C | 2.5738   | -1.64057 | 1.00965  |
| H | 7.31355  | -0.98311 | 0.24016  |
| H | 5.72989  | -2.8987  | 0.60229  |

|                                     |          |          |          |
|-------------------------------------|----------|----------|----------|
| C                                   | 6.49095  | -0.27947 | 0.32622  |
| C                                   | 5.64367  | 2.02691  | 0.32095  |
| C                                   | 6.71759  | 1.05222  | 0.2099   |
| H                                   | 7.70464  | 1.45785  | 0.03056  |
| O                                   | 4.34488  | 1.48482  | 0.55943  |
| O                                   | 5.74365  | 3.24758  | 0.23378  |
| O                                   | 1.80905  | 0.72307  | 0.94015  |
| C                                   | 0.56621  | 0.52555  | 1.67675  |
| H                                   | 0.14504  | 1.51991  | 1.7651   |
| H                                   | 0.7917   | 0.07492  | 2.64869  |
| O                                   | 1.34994  | -2.29233 | 1.21627  |
| C                                   | 1.63596  | -3.68127 | 1.24267  |
| H                                   | 0.77803  | -4.31399 | 1.38653  |
| C                                   | 2.95994  | -3.9001  | 1.06887  |
| H                                   | 3.44582  | -4.86286 | 1.04573  |
| H                                   | -0.14189 | -1.21709 | 0.95585  |
| <b><sup>4</sup>P-OH<sub>A</sub></b> |          |          |          |
| Fe                                  | -1.90292 | -0.2446  | 0.47251  |
| O                                   | -0.47218 | 0.32976  | -1.52383 |
| S                                   | -3.27517 | -0.6501  | 2.49959  |
| H                                   | -4.50183 | -0.78497 | 1.87603  |
| N                                   | -1.62302 | -2.19097 | 0.01018  |
| C                                   | -1.97022 | -4.35685 | -0.74751 |
| C                                   | -0.85812 | -4.38165 | 0.04508  |
| H                                   | -2.43564 | -5.17706 | -1.27457 |
| H                                   | -0.23025 | -5.22464 | 0.29366  |
| N                                   | -0.21223 | -0.2629  | 1.5611   |
| C                                   | 0.55906  | -1.37369 | 1.87658  |
| C                                   | 1.62569  | -0.9908  | 2.7718   |
| C                                   | 1.50331  | 0.35308  | 2.99371  |
| H                                   | 2.36475  | -1.67171 | 3.16794  |
| H                                   | 2.12197  | 0.98912  | 3.61014  |
| N                                   | -1.94341 | 1.78259  | 0.60757  |
| C                                   | -1.13044 | 2.57859  | 1.40603  |
| C                                   | -2.90935 | 2.62984  | 0.07733  |
| C                                   | -1.57891 | 3.95162  | 1.3463   |
| C                                   | -2.67363 | 3.98348  | 0.52704  |
| H                                   | -1.11915 | 4.77034  | 1.88107  |
| H                                   | -3.28423 | 4.83355  | 0.25853  |
| N                                   | -3.46251 | -0.18    | -0.79702 |
| C                                   | -5.29972 | 0.54697  | -2.01025 |
| H                                   | -6.03425 | 1.2272   | -2.41644 |
| C                                   | -4.21549 | 0.93692  | -1.13883 |
| C                                   | -2.45168 | -2.99223 | -0.7636  |
| C                                   | -0.64733 | -3.03365 | 0.52607  |
| C                                   | 0.36221  | 0.8085   | 2.2336   |



|   |          |          |          |
|---|----------|----------|----------|
| C | -3.96271 | 2.23971  | -0.73492 |
| H | -4.64531 | 3.01045  | -1.07641 |
| C | -3.58096 | -2.56148 | -1.44162 |
| H | -4.14045 | -3.29938 | -2.00631 |
| C | 0.36449  | -2.6585  | 1.39357  |
| H | 1.06034  | -3.42517 | 1.71487  |
| C | -0.06149 | 2.12782  | 2.1646   |
| H | 0.48423  | 2.86033  | 2.74947  |
| C | -5.19498 | -0.80243 | -2.20657 |
| H | -5.8263  | -1.44263 | -2.80556 |
| C | -4.04464 | -1.2541  | -1.45878 |
| C | 3.54595  | 2.54737  | -0.83734 |
| C | 4.79627  | 2.06959  | -0.44945 |
| C | 4.99164  | 0.67691  | -0.39618 |
| C | 3.9378   | -0.20958 | -0.73795 |
| C | 2.66816  | 0.24372  | -1.14714 |
| C | 2.52064  | 1.62989  | -1.17219 |
| H | 7.06597  | 0.74747  | 0.26228  |
| H | 5.60492  | 2.74186  | -0.18604 |
| C | 6.2475   | 0.08243  | 0.00321  |
| C | 5.3441   | -2.18503 | -0.27443 |
| C | 6.41645  | -1.26185 | 0.06142  |
| H | 7.3519   | -1.71535 | 0.36185  |
| O | 4.11892  | -1.58077 | -0.68179 |
| O | 5.3905   | -3.41249 | -0.24212 |
| O | 1.7123   | -0.70804 | -1.42539 |
| C | 0.52652  | -0.38443 | -2.22755 |
| H | 0.11361  | -1.35897 | -2.46299 |
| H | 0.85027  | 0.15766  | -3.12318 |
| O | 1.35734  | 2.33927  | -1.50433 |
| C | 1.67553  | 3.71318  | -1.36608 |
| H | 0.86327  | 4.38652  | -1.57557 |
| C | 2.9625   | 3.87151  | -0.97863 |
| H | 3.46054  | 4.81166  | -0.80054 |
| H | -0.22141 | 1.27298  | -1.40399 |

## Path B

### <sup>2</sup>RC<sub>B</sub>

|    |          |          |          |
|----|----------|----------|----------|
| Fe | -2.57036 | -0.02129 | 0.0319   |
| O  | -1.16808 | 0.66848  | -0.50793 |
| S  | -4.88913 | -0.75417 | 0.90481  |
| H  | -4.59558 | -0.77246 | 2.25598  |
| N  | -3.11515 | 1.5901   | 1.13039  |
| C  | -3.22925 | 3.18414  | 2.81724  |
| C  | -3.86548 | 3.70571  | 1.72779  |
| H  | -3.08515 | 3.63507  | 3.78819  |

|   |          |          |          |
|---|----------|----------|----------|
| H | -4.34806 | 4.66723  | 1.63103  |
| N | -3.6897  | 0.66976  | -1.49827 |
| C | -4.28487 | 1.91622  | -1.59871 |
| C | -4.90467 | 2.06532  | -2.89797 |
| C | -4.68858 | 0.9033   | -3.58086 |
| H | -5.43917 | 2.94541  | -3.22417 |
| H | -5.00813 | 0.64261  | -4.57917 |
| N | -2.29206 | -1.74981 | -0.95604 |
| C | -2.71309 | -2.05633 | -2.23634 |
| C | -1.54552 | -2.83549 | -0.53031 |
| C | -2.22465 | -3.36304 | -2.62066 |
| C | -1.49679 | -3.84136 | -1.56863 |
| H | -2.4185  | -3.83492 | -3.57271 |
| H | -0.97313 | -4.78204 | -1.48464 |
| N | -1.69748 | -0.81675 | 1.66724  |
| C | -0.38404 | -2.16686 | 3.02518  |
| H | 0.22622  | -3.00907 | 3.3132   |
| C | -1.01499 | -2.02243 | 1.73237  |
| C | -2.747   | 1.87325  | 2.44355  |
| C | -3.78985 | 2.71846  | 0.6739   |
| C | -3.92468 | 0.03595  | -2.71053 |
| C | -0.93906 | -2.95776 | 0.71179  |
| H | -0.33836 | -3.84031 | 0.89288  |
| C | -2.00134 | 1.03969  | 3.25836  |
| H | -1.77374 | 1.39313  | 4.25855  |
| C | -4.31396 | 2.87552  | -0.59686 |
| H | -4.81183 | 3.81339  | -0.81899 |
| C | -3.4807  | -1.2312  | -3.04848 |
| H | -3.74036 | -1.60473 | -4.03343 |
| C | -0.69301 | -1.04892 | 3.74616  |
| H | -0.39789 | -0.79864 | 4.75459  |
| C | -1.5041  | -0.20579 | 2.89463  |
| C | 5.9152   | 2.05091  | -0.95844 |
| C | 4.52341  | 1.9809   | -0.99203 |
| C | 3.90426  | 0.79771  | -0.54933 |
| C | 4.68827  | -0.28847 | -0.08267 |
| C | 6.09669  | -0.24741 | -0.03645 |
| C | 6.66683  | 0.94485  | -0.48595 |
| H | 1.84163  | 1.4374   | -0.89046 |
| H | 3.91934  | 2.80787  | -1.34742 |
| C | 2.46953  | 0.62314  | -0.54228 |
| C | 2.67645  | -1.64332 | 0.36994  |
| C | 1.88807  | -0.52475 | -0.11235 |
| H | 0.81209  | -0.63293 | -0.11263 |
| O | 4.08737  | -1.45863 | 0.35766  |
| O | 2.25699  | -2.72657 | 0.78748  |

|                                   |          |          |          |
|-----------------------------------|----------|----------|----------|
| O                                 | 6.73906  | -1.36591 | 0.43645  |
| C                                 | 8.19818  | -1.39709 | 0.53751  |
| H                                 | 8.56131  | -0.61906 | 1.21332  |
| H                                 | 8.4154   | -2.38445 | 0.94232  |
| H                                 | 8.66256  | -1.276   | -0.44388 |
| O                                 | 8.03346  | 1.24923  | -0.54772 |
| C                                 | 8.118    | 2.5585   | -1.06444 |
| H                                 | 9.11937  | 2.93721  | -1.17178 |
| C                                 | 6.88824  | 3.06725  | -1.31999 |
| H                                 | 6.67274  | 4.04616  | -1.71875 |
| <b><sup>4</sup>RC<sub>B</sub></b> |          |          |          |
| Fe                                | -2.57904 | -0.01618 | 0.03599  |
| O                                 | -1.17032 | 0.65073  | -0.52408 |
| S                                 | -4.86568 | -0.78671 | 0.90197  |
| H                                 | -4.5791  | -0.78086 | 2.25467  |
| N                                 | -3.13106 | 1.59826  | 1.11627  |
| C                                 | -3.27164 | 3.20055  | 2.79338  |
| C                                 | -3.91961 | 3.70334  | 1.70211  |
| H                                 | -3.13395 | 3.66011  | 3.76121  |
| H                                 | -4.42    | 4.65516  | 1.60014  |
| N                                 | -3.70086 | 0.64964  | -1.50226 |
| C                                 | -4.31489 | 1.88599  | -1.61172 |
| C                                 | -4.93753 | 2.01643  | -2.91147 |
| C                                 | -4.70435 | 0.85275  | -3.58591 |
| H                                 | -5.48524 | 2.88604  | -3.2438  |
| H                                 | -5.02057 | 0.58001  | -4.58206 |
| N                                 | -2.2796  | -1.75325 | -0.94068 |
| C                                 | -2.69115 | -2.07181 | -2.22057 |
| C                                 | -1.52601 | -2.8289  | -0.50351 |
| C                                 | -2.18755 | -3.37614 | -2.59456 |
| C                                 | -1.46184 | -3.84118 | -1.53525 |
| H                                 | -2.37111 | -3.85549 | -3.54492 |
| H                                 | -0.92945 | -4.77609 | -1.44233 |
| N                                 | -1.69246 | -0.78855 | 1.67614  |
| C                                 | -0.37011 | -2.11794 | 3.04597  |
| H                                 | 0.24452  | -2.95427 | 3.34174  |
| C                                 | -1.00474 | -1.9908  | 1.75295  |
| C                                 | -2.76712 | 1.89592  | 2.42755  |
| C                                 | -3.82833 | 2.71089  | 0.65452  |
| C                                 | -3.92761 | 0.00292  | -2.70969 |
| C                                 | -0.9241  | -2.93649 | 0.74227  |
| H                                 | -0.31917 | -3.81403 | 0.93331  |
| C                                 | -2.00796 | 1.08044  | 3.24829  |
| H                                 | -1.78282 | 1.44638  | 4.24452  |
| C                                 | -4.3568  | 2.85157  | -0.61632 |
| H                                 | -4.86971 | 3.78008  | -0.84348 |

|                                     |          |          |          |
|-------------------------------------|----------|----------|----------|
| C                                   | -3.46674 | -1.2605  | -3.03913 |
| H                                   | -3.72061 | -1.64314 | -4.0221  |
| C                                   | -0.68168 | -0.9932  | 3.75506  |
| H                                   | -0.3851  | -0.73038 | 4.75987  |
| C                                   | -1.49942 | -0.16378 | 2.89642  |
| C                                   | 5.91948  | 2.04432  | -0.98494 |
| C                                   | 4.52812  | 1.96968  | -1.02555 |
| C                                   | 3.90985  | 0.79127  | -0.56909 |
| C                                   | 4.69432  | -0.28555 | -0.082   |
| C                                   | 6.10231  | -0.23965 | -0.02819 |
| C                                   | 6.67158  | 0.94758  | -0.49187 |
| H                                   | 1.84759  | 1.42005  | -0.93083 |
| H                                   | 3.92377  | 2.7896   | -1.39649 |
| C                                   | 2.47562  | 0.61253  | -0.56752 |
| C                                   | 2.68398  | -1.63963 | 0.37903  |
| C                                   | 1.89495  | -0.53066 | -0.12417 |
| H                                   | 0.81926  | -0.64183 | -0.12822 |
| O                                   | 4.09424  | -1.4509  | 0.37203  |
| O                                   | 2.26539  | -2.71789 | 0.81022  |
| O                                   | 6.74506  | -1.34909 | 0.46496  |
| C                                   | 8.20373  | -1.375   | 0.57405  |
| H                                   | 8.56142  | -0.58571 | 1.2396   |
| H                                   | 8.42126  | -2.35545 | 0.99516  |
| H                                   | 8.67291  | -1.26791 | -0.40671 |
| O                                   | 8.0376   | 1.25519  | -0.55002 |
| C                                   | 8.12134  | 2.55701  | -1.08541 |
| H                                   | 9.12221  | 2.93716  | -1.19237 |
| C                                   | 6.89162  | 3.05819  | -1.35565 |
| H                                   | 6.6756   | 4.0305   | -1.76999 |
| <b><sup>2</sup>TS-O<sub>B</sub></b> |          |          |          |
| Fe                                  | -1.86765 | 0.16023  | 0.29164  |
| O                                   | -0.18365 | -0.17767 | -0.06998 |
| S                                   | -4.06246 | 0.77271  | 1.22373  |
| H                                   | -4.04653 | -0.04283 | 2.33904  |
| N                                   | -1.20233 | 0.73788  | 2.12157  |
| C                                   | -0.41003 | 0.73397  | 4.30377  |
| C                                   | -0.30061 | 2.01227  | 3.83887  |
| H                                   | -0.14265 | 0.34928  | 5.27716  |
| H                                   | 0.0723   | 2.88394  | 4.35671  |
| N                                   | -1.8248  | 2.06789  | -0.34931 |
| C                                   | -1.33808 | 3.15831  | 0.35694  |
| C                                   | -1.44621 | 4.35451  | -0.45048 |
| C                                   | -2.01085 | 3.98878  | -1.63988 |
| H                                   | -1.13975 | 5.3397   | -0.13004 |
| H                                   | -2.25614 | 4.6142   | -2.48592 |
| N                                   | -2.66449 | -0.38678 | -1.46545 |

|   |          |          |          |
|---|----------|----------|----------|
| C | -2.99663 | 0.42659  | -2.54171 |
| C | -3.03062 | -1.67143 | -1.83578 |
| C | -3.56521 | -0.369   | -3.60742 |
| C | -3.58121 | -1.66401 | -3.1736  |
| H | -3.90457 | 0.02514  | -4.55418 |
| H | -3.934   | -2.54146 | -3.69525 |
| N | -2.0621  | -1.72269 | 0.99811  |
| C | -2.37338 | -4.02039 | 1.08662  |
| H | -2.62889 | -5.01439 | 0.75045  |
| C | -2.46856 | -2.82714 | 0.27129  |
| C | -0.96368 | -0.0632  | 3.22807  |
| C | -0.79161 | 2.01325  | 2.47506  |
| C | -2.2455  | 2.56315  | -1.57574 |
| C | -2.91606 | -2.80296 | -1.0408  |
| H | -3.21187 | -3.7489  | -1.48125 |
| C | -1.20278 | -1.42692 | 3.28783  |
| H | -0.9644  | -1.9361  | 4.21578  |
| C | -0.84438 | 3.12808  | 1.65363  |
| H | -0.49149 | 4.0664   | 2.06932  |
| C | -2.80058 | 1.79939  | -2.59237 |
| H | -3.10013 | 2.31433  | -3.49924 |
| C | -1.90287 | -3.63221 | 2.30736  |
| H | -1.69742 | -4.24463 | 3.17307  |
| C | -1.70103 | -2.19906 | 2.24683  |
| C | 4.9247   | 1.4269   | -0.57061 |
| C | 3.65649  | 1.67157  | -1.08903 |
| C | 2.78095  | 0.57784  | -1.27163 |
| C | 3.20759  | -0.73872 | -0.9344  |
| C | 4.48234  | -1.01355 | -0.40708 |
| C | 5.3095   | 0.10092  | -0.24349 |
| H | 1.11055  | 1.72746  | -2.05068 |
| H | 3.32788  | 2.67239  | -1.34467 |
| C | 1.45542  | 0.73562  | -1.78036 |
| C | 1.06953  | -1.70972 | -1.66338 |
| C | 0.57391  | -0.33771 | -1.83997 |
| O | 2.37706  | -1.83071 | -1.13924 |
| O | 0.45645  | -2.74197 | -1.92062 |
| O | 4.78423  | -2.32702 | -0.1406  |
| C | 5.96156  | -2.66712 | 0.65975  |
| H | 5.9236   | -2.17547 | 1.63598  |
| H | 5.89938  | -3.74783 | 0.77848  |
| H | 6.8828   | -2.38958 | 0.1442   |
| O | 6.6203   | 0.10297  | 0.24599  |
| C | 7.04421  | 1.44907  | 0.22272  |
| H | 8.04718  | 1.61185  | 0.57642  |
| C | 6.07073  | 2.26234  | -0.25328 |

|                                     |          |          |          |
|-------------------------------------|----------|----------|----------|
| H                                   | 6.13593  | 3.33224  | -0.37476 |
| H                                   | -0.3649  | -0.26009 | -2.36836 |
| <b><sup>4</sup>TS-O<sub>B</sub></b> |          |          |          |
| Fe                                  | -1.85506 | 0.14621  | 0.36027  |
| O                                   | -0.20736 | -0.01098 | -0.18986 |
| S                                   | -4.19593 | 0.28941  | 0.98779  |
| H                                   | -4.4638  | 1.5504   | 0.49127  |
| N                                   | -1.21055 | 0.4859   | 2.21526  |
| C                                   | -0.485   | 0.19624  | 4.39975  |
| C                                   | -0.41537 | 1.53124  | 4.1292   |
| H                                   | -0.23078 | -0.31753 | 5.31531  |
| H                                   | -0.09322 | 2.3318   | 4.77907  |
| N                                   | -1.8802  | 2.14231  | -0.01504 |
| C                                   | -1.4479  | 3.13863  | 0.84114  |
| C                                   | -1.53772 | 4.42489  | 0.18675  |
| C                                   | -2.01578 | 4.20087  | -1.07455 |
| H                                   | -1.26689 | 5.36575  | 0.64344  |
| H                                   | -2.21429 | 4.92226  | -1.85403 |
| N                                   | -2.61569 | -0.17055 | -1.515   |
| C                                   | -2.88031 | 0.78041  | -2.4921  |
| C                                   | -2.95481 | -1.39363 | -2.0653  |
| C                                   | -3.38764 | 0.13061  | -3.68221 |
| C                                   | -3.43146 | -1.20936 | -3.41928 |
| H                                   | -3.67234 | 0.64558  | -4.58824 |
| H                                   | -3.75594 | -2.00954 | -4.06809 |
| N                                   | -2.05141 | -1.79852 | 0.77014  |
| C                                   | -2.39525 | -4.08213 | 0.55803  |
| H                                   | -2.65529 | -5.02168 | 0.09352  |
| C                                   | -2.46151 | -2.79779 | -0.10407 |
| C                                   | -0.98717 | -0.45401 | 3.20674  |
| C                                   | -0.87506 | 1.71515  | 2.76761  |
| C                                   | -2.22349 | 2.77569  | -1.20314 |
| C                                   | -2.8673  | -2.61541 | -1.4143  |
| H                                   | -3.14458 | -3.50041 | -1.97585 |
| C                                   | -1.22702 | -1.81333 | 3.09024  |
| H                                   | -1.00781 | -2.43806 | 3.94922  |
| C                                   | -0.983   | 2.94063  | 2.13586  |
| H                                   | -0.68263 | 3.81942  | 2.69666  |
| C                                   | -2.68831 | 2.14638  | -2.35008 |
| H                                   | -2.92643 | 2.77546  | -3.20149 |
| C                                   | -1.94296 | -3.85986 | 1.8259   |
| H                                   | -1.76071 | -4.58067 | 2.60931  |
| C                                   | -1.72113 | -2.43602 | 1.95489  |
| C                                   | 4.99403  | 1.45983  | -0.63562 |
| C                                   | 3.74954  | 1.71321  | -1.20593 |
| C                                   | 2.83835  | 0.64063  | -1.34177 |

|                                    |          |          |          |
|------------------------------------|----------|----------|----------|
| C                                  | 3.21497  | -0.66462 | -0.91327 |
| C                                  | 4.46302  | -0.94848 | -0.33233 |
| C                                  | 5.32317  | 0.14739  | -0.20994 |
| H                                  | 1.22737  | 1.79294  | -2.2332  |
| H                                  | 3.46334  | 2.70676  | -1.53131 |
| C                                  | 1.5322   | 0.80993  | -1.89205 |
| C                                  | 1.07654  | -1.61478 | -1.66088 |
| C                                  | 0.60195  | -0.23512 | -1.87997 |
| O                                  | 2.35782  | -1.74463 | -1.08977 |
| O                                  | 0.45708  | -2.64133 | -1.92809 |
| O                                  | 4.69681  | -2.24809 | 0.04647  |
| C                                  | 5.99616  | -2.64192 | 0.59069  |
| H                                  | 6.20857  | -2.11406 | 1.52309  |
| H                                  | 5.89472  | -3.71085 | 0.77242  |
| H                                  | 6.7967   | -2.45227 | -0.12874 |
| O                                  | 6.61355  | 0.14278  | 0.33347  |
| C                                  | 7.08179  | 1.47031  | 0.23865  |
| H                                  | 8.07506  | 1.62636  | 0.62163  |
| C                                  | 6.15425  | 2.27918  | -0.32819 |
| H                                  | 6.25841  | 3.33649  | -0.51518 |
| H                                  | -0.30795 | -0.16448 | -2.4588  |
| <b><sup>2</sup>INT<sub>B</sub></b> |          |          |          |
| Fe                                 | -1.88127 | 0.36667  | 0.32999  |
| O                                  | 0.04038  | -0.54693 | -0.25219 |
| S                                  | -3.86424 | 1.25592  | 1.05117  |
| H                                  | -3.35625 | 2.04216  | 2.06815  |
| N                                  | -0.91331 | 2.13324  | 0.41953  |
| C                                  | 0.27357  | 3.98323  | 1.1684   |
| C                                  | -0.15973 | 4.268    | -0.09697 |
| H                                  | 0.85174  | 4.60729  | 1.83458  |
| H                                  | -0.00664 | 5.17124  | -0.67021 |
| N                                  | -2.34737 | 0.70595  | -1.60904 |
| C                                  | -2.16114 | 1.89943  | -2.2994  |
| C                                  | -2.75968 | 1.80669  | -3.61326 |
| C                                  | -3.31805 | 0.56371  | -3.71586 |
| H                                  | -2.7514  | 2.59897  | -4.3479  |
| H                                  | -3.85748 | 0.13852  | -4.54979 |
| N                                  | -2.69461 | -1.46478 | 0.16528  |
| C                                  | -3.35191 | -2.01479 | -0.92744 |
| C                                  | -2.80475 | -2.3988  | 1.18505  |
| C                                  | -3.86498 | -3.32534 | -0.58801 |
| C                                  | -3.53115 | -3.56026 | 0.71394  |
| H                                  | -4.40675 | -3.96645 | -1.26786 |
| H                                  | -3.74422 | -4.4334  | 1.31323  |
| N                                  | -1.27059 | -0.03179 | 2.19844  |
| C                                  | -0.99697 | -1.07207 | 4.2544   |

|                                    |          |          |          |
|------------------------------------|----------|----------|----------|
| H                                  | -1.08715 | -1.83038 | 5.01855  |
| C                                  | -1.57335 | -1.16971 | 2.92882  |
| C                                  | -0.20324 | 2.6574   | 1.49315  |
| C                                  | -0.90184 | 3.11606  | -0.56311 |
| C                                  | -3.07344 | -0.11738 | -2.46422 |
| C                                  | -2.29116 | -2.26182 | 2.46477  |
| H                                  | -2.45062 | -3.0828  | 3.15565  |
| C                                  | -0.00715 | 2.02069  | 2.70984  |
| H                                  | 0.56723  | 2.54584  | 3.46553  |
| C                                  | -1.48681 | 3.01213  | -1.81806 |
| H                                  | -1.40802 | 3.87054  | -2.47702 |
| C                                  | -3.52263 | -1.39342 | -2.15544 |
| H                                  | -4.07132 | -1.93267 | -2.91997 |
| C                                  | -0.3404  | 0.12299  | 4.32025  |
| H                                  | 0.21224  | 0.54004  | 5.14961  |
| C                                  | -0.51255 | 0.77249  | 3.0378   |
| C                                  | 4.39968  | 1.23926  | -0.51833 |
| C                                  | 3.0501   | 1.27534  | -0.8856  |
| C                                  | 2.36645  | 0.06107  | -1.00575 |
| C                                  | 3.02376  | -1.1638  | -0.7607  |
| C                                  | 4.37631  | -1.2384  | -0.38286 |
| C                                  | 5.02651  | -0.00381 | -0.27418 |
| H                                  | 0.49965  | 0.90014  | -1.8134  |
| H                                  | 2.53163  | 2.21176  | -1.05622 |
| C                                  | 0.93875  | 0.02541  | -1.35192 |
| C                                  | 1.06786  | -2.53667 | -1.37859 |
| C                                  | 0.2724   | -1.28638 | -1.54253 |
| H                                  | -0.6103  | -1.38237 | -2.1598  |
| O                                  | 2.37203  | -2.40095 | -0.90945 |
| O                                  | 0.6407   | -3.65453 | -1.64152 |
| O                                  | 4.90403  | -2.48731 | -0.17932 |
| C                                  | 6.28486  | -2.64947 | 0.2809   |
| H                                  | 6.43296  | -2.16496 | 1.24892  |
| H                                  | 6.4081   | -3.72739 | 0.37198  |
| H                                  | 6.99072  | -2.24301 | -0.44651 |
| O                                  | 6.3643   | 0.2084   | 0.07671  |
| C                                  | 6.55751  | 1.60406  | 0.04976  |
| H                                  | 7.55226  | 1.92735  | 0.30166  |
| C                                  | 5.41701  | 2.25022  | -0.29792 |
| H                                  | 5.29116  | 3.31733  | -0.39255 |
| <b><sup>4</sup>INT<sub>B</sub></b> |          |          |          |
| Fe                                 | -2.7482  | 0.01229  | 0.10532  |
| O                                  | -0.30141 | -0.76702 | -0.68043 |
| S                                  | -5.00069 | 0.90651  | 0.94703  |
| H                                  | -4.53606 | 1.69996  | 1.97951  |
| N                                  | -2.50697 | 1.99237  | -0.20298 |



|   |          |          |          |
|---|----------|----------|----------|
| C | -1.78664 | 4.19369  | -0.00599 |
| C | -2.3763  | 4.07201  | -1.2308  |
| H | -1.33862 | 5.07085  | 0.43735  |
| H | -2.50766 | 4.8302   | -1.98869 |
| N | -3.76097 | -0.11801 | -1.63321 |
| C | -3.89586 | 0.86842  | -2.59583 |
| C | -4.59864 | 0.34483  | -3.74758 |
| C | -4.89153 | -0.96057 | -3.4785  |
| H | -4.8346  | 0.91659  | -4.63295 |
| H | -5.41398 | -1.67271 | -4.10014 |
| N | -3.25691 | -1.88938 | 0.53852  |
| C | -3.9239  | -2.77926 | -0.28132 |
| C | -2.92395 | -2.59818 | 1.67929  |
| C | -4.01191 | -4.07468 | 0.35778  |
| C | -3.39257 | -3.96295 | 1.56973  |
| H | -4.48916 | -4.94154 | -0.07503 |
| H | -3.26105 | -4.72008 | 2.32868  |
| N | -1.97288 | 0.22355  | 1.95726  |
| C | -1.10018 | -0.25517 | 4.05439  |
| H | -0.84752 | -0.83167 | 4.9321   |
| C | -1.80653 | -0.77598 | 2.90439  |
| C | -1.85375 | 2.89776  | 0.6317   |
| C | -2.81779 | 2.70121  | -1.35999 |
| C | -4.36398 | -1.2512  | -2.16276 |
| C | -2.25129 | -2.08237 | 2.77761  |
| H | -2.05658 | -2.75722 | 3.60442  |
| C | -1.32646 | 2.59858  | 1.87485  |
| H | -0.83166 | 3.39991  | 2.41329  |
| C | -3.44473 | 2.17459  | -2.4749  |
| H | -3.61442 | 2.84092  | -3.31376 |
| C | -4.44342 | -2.48219 | -1.53495 |
| H | -4.94773 | -3.28178 | -2.06717 |
| C | -0.83576 | 1.06003  | 3.79896  |
| H | -0.32352 | 1.77521  | 4.42557  |
| C | -1.37996 | 1.35399  | 2.49117  |
| C | 3.382    | 2.41069  | 0.65393  |
| C | 2.31155  | 1.8956   | -0.07554 |
| C | 2.15146  | 0.49814  | -0.13282 |
| C | 3.06593  | -0.3564  | 0.53558  |
| C | 4.15718  | 0.13467  | 1.2782   |
| C | 4.27253  | 1.52527  | 1.31433  |
| H | 0.36747  | 0.50704  | -1.37836 |
| H | 1.6098   | 2.54311  | -0.58947 |
| C | 1.07601  | -0.13347 | -0.86108 |
| C | 1.8666   | -2.3727  | -0.23284 |
| C | 0.93791  | -1.48243 | -0.9101  |

|                           |          |          |          |
|---------------------------|----------|----------|----------|
| H                         | 0.13504  | -1.96332 | -1.45347 |
| O                         | 2.91935  | -1.73587 | 0.47929  |
| O                         | 1.82809  | -3.60277 | -0.21912 |
| O                         | 4.9626   | -0.78876 | 1.90193  |
| C                         | 6.28009  | -0.39255 | 2.40258  |
| H                         | 6.19196  | 0.3276   | 3.21773  |
| H                         | 6.72217  | -1.32371 | 2.75461  |
| H                         | 6.88746  | 0.03655  | 1.60036  |
| O                         | 5.24687  | 2.26259  | 1.98947  |
| C                         | 4.96042  | 3.62661  | 1.74011  |
| H                         | 5.63741  | 4.32981  | 2.20508  |
| C                         | 3.86232  | 3.74812  | 0.9528   |
| H                         | 3.42791  | 4.67531  | 0.61345  |
| <b><sup>2</sup>P-epov</b> |          |          |          |
| Fe                        | -2.7482  | 0.01229  | 0.10532  |
| O                         | -0.04974 | -0.80945 | -0.74407 |
| S                         | -5.00069 | 0.90651  | 0.94703  |
| H                         | -4.53606 | 1.69996  | 1.97951  |
| N                         | -2.50697 | 1.99237  | -0.20298 |
| C                         | -1.78664 | 4.19369  | -0.00599 |
| C                         | -2.3763  | 4.07201  | -1.2308  |
| H                         | -1.33862 | 5.07085  | 0.43735  |
| H                         | -2.50766 | 4.8302   | -1.98869 |
| N                         | -3.76097 | -0.11801 | -1.63321 |
| C                         | -3.89586 | 0.86842  | -2.59583 |
| C                         | -4.59864 | 0.34483  | -3.74758 |
| C                         | -4.89153 | -0.96057 | -3.4785  |
| H                         | -4.8346  | 0.91659  | -4.63295 |
| H                         | -5.41398 | -1.67271 | -4.10014 |
| N                         | -3.25691 | -1.88938 | 0.53852  |
| C                         | -3.9239  | -2.77926 | -0.28132 |
| C                         | -2.92395 | -2.59818 | 1.67929  |
| C                         | -4.01191 | -4.07468 | 0.35778  |
| C                         | -3.39257 | -3.96295 | 1.56973  |
| H                         | -4.48916 | -4.94154 | -0.07503 |
| H                         | -3.26105 | -4.72008 | 2.32868  |
| N                         | -1.97288 | 0.22355  | 1.95726  |
| C                         | -1.10018 | -0.25517 | 4.05439  |
| H                         | -0.84752 | -0.83167 | 4.9321   |
| C                         | -1.80653 | -0.77598 | 2.90439  |
| C                         | -1.85375 | 2.89776  | 0.6317   |
| C                         | -2.81779 | 2.70121  | -1.35999 |
| C                         | -4.36398 | -1.2512  | -2.16276 |
| C                         | -2.25129 | -2.08237 | 2.77761  |
| H                         | -2.05658 | -2.75722 | 3.60442  |
| C                         | -1.32646 | 2.59858  | 1.87485  |

|                           |          |          |          |
|---------------------------|----------|----------|----------|
| H                         | -0.83166 | 3.39991  | 2.41329  |
| C                         | -3.44473 | 2.17459  | -2.4749  |
| H                         | -3.61442 | 2.84092  | -3.31376 |
| C                         | -4.44342 | -2.48219 | -1.53495 |
| H                         | -4.94773 | -3.28178 | -2.06717 |
| C                         | -0.83576 | 1.06003  | 3.79896  |
| H                         | -0.32352 | 1.77521  | 4.42557  |
| C                         | -1.37996 | 1.35399  | 2.49117  |
| C                         | 3.5315   | 2.39074  | 0.60731  |
| C                         | 2.46104  | 1.87565  | -0.12216 |
| C                         | 2.30096  | 0.47819  | -0.17943 |
| C                         | 3.21543  | -0.37635 | 0.48896  |
| C                         | 4.30668  | 0.11472  | 1.23159  |
| C                         | 4.42203  | 1.50533  | 1.26771  |
| H                         | 0.51697  | 0.4871   | -1.42498 |
| H                         | 1.75929  | 2.52317  | -0.63609 |
| C                         | 1.2255   | -0.15341 | -0.90769 |
| C                         | 2.0161   | -2.39264 | -0.27946 |
| C                         | 1.08741  | -1.50237 | -0.95672 |
| H                         | 0.28454  | -1.98327 | -1.50009 |
| O                         | 3.06885  | -1.75582 | 0.43267  |
| O                         | 1.97759  | -3.62271 | -0.26573 |
| O                         | 5.1121   | -0.8087  | 1.85531  |
| C                         | 6.42959  | -0.41249 | 2.35596  |
| H                         | 6.34146  | 0.30766  | 3.17111  |
| H                         | 6.87167  | -1.34366 | 2.70799  |
| H                         | 7.03696  | 0.0166   | 1.55374  |
| O                         | 5.39637  | 2.24264  | 1.94285  |
| C                         | 5.10992  | 3.60667  | 1.6935   |
| H                         | 5.78691  | 4.30987  | 2.15846  |
| C                         | 4.01182  | 3.72817  | 0.90618  |
| H                         | 3.5774   | 4.65536  | 0.56683  |
| <b><sup>4</sup>P-epov</b> |          |          |          |
| Fe                        | -1.67907 | 0.23673  | 0.63175  |
| O                         | -0.45784 | -0.05669 | -1.60728 |
| S                         | -2.97797 | 0.56342  | 2.59538  |
| H                         | -1.95559 | 0.55229  | 3.52607  |
| N                         | -1.32667 | 2.2574   | 0.21008  |
| C                         | -0.49663 | 4.41201  | 0.31369  |
| C                         | -1.65575 | 4.458    | -0.41438 |
| H                         | 0.15846  | 5.23132  | 0.57371  |
| H                         | -2.12629 | 5.32165  | -0.86227 |
| N                         | -3.32877 | 0.29495  | -0.5102  |
| C                         | -3.91825 | 1.43245  | -1.04759 |
| C                         | -5.16123 | 1.06012  | -1.69384 |
| C                         | -5.30473 | -0.29157 | -1.55686 |

|   |          |          |          |
|---|----------|----------|----------|
| H | -5.82147 | 1.75428  | -2.19337 |
| H | -6.10442 | -0.91872 | -1.92346 |
| N | -1.74375 | -1.85217 | 0.59071  |
| C | -2.7724  | -2.62666 | 0.08757  |
| C | -0.87022 | -2.71082 | 1.23245  |
| C | -2.51558 | -4.02233 | 0.38764  |
| C | -1.34317 | -4.07437 | 1.0903   |
| H | -3.15411 | -4.84388 | 0.09718  |
| H | -0.83956 | -4.94615 | 1.48158  |
| N | 0.0776   | 0.15286  | 1.59783  |
| C | 1.87183  | -0.60435 | 2.84388  |
| H | 2.52753  | -1.29929 | 3.34771  |
| C | 0.67469  | -0.9877  | 2.12565  |
| C | -0.3011  | 3.03261  | 0.71675  |
| C | -2.18242 | 3.10751  | -0.4638  |
| C | -4.15229 | -0.77815 | -0.82467 |
| C | 0.24819  | -2.30136 | 1.95004  |
| H | 0.85276  | -3.07498 | 2.41082  |
| C | 0.71868  | 2.55178  | 1.53284  |
| H | 1.45651  | 3.26741  | 1.88091  |
| C | -3.39005 | 2.71991  | -1.03702 |
| H | -3.98093 | 3.49252  | -1.51845 |
| C | -3.8959  | -2.12022 | -0.55735 |
| H | -4.64169 | -2.83504 | -0.88932 |
| C | 2.00115  | 0.75215  | 2.73257  |
| H | 2.783    | 1.38285  | 3.13039  |
| C | 0.88761  | 1.23148  | 1.9405   |
| C | 3.98922  | 1.49907  | -1.13237 |
| C | 2.76697  | 1.50595  | -1.81361 |
| C | 2.02618  | 0.32102  | -1.85811 |
| C | 2.50984  | -0.85185 | -1.23901 |
| C | 3.7262   | -0.8935  | -0.53573 |
| C | 4.43278  | 0.31345  | -0.50531 |
| H | 0.47163  | 1.05379  | -3.22344 |
| H | 2.38483  | 2.40582  | -2.28161 |
| C | 0.70628  | 0.27285  | -2.5093  |
| C | 0.67199  | -2.26111 | -2.08706 |
| C | 0.0095   | -1.04015 | -2.62708 |
| H | -0.69981 | -1.23641 | -3.42114 |
| O | 1.82094  | -2.07406 | -1.32268 |
| O | 0.26841  | -3.40024 | -2.29138 |
| O | 4.07927  | -2.08407 | 0.04868  |
| C | 5.43513  | -2.28071 | 0.56725  |
| H | 5.6334   | -1.61609 | 1.40991  |
| H | 5.44934  | -3.32167 | 0.88653  |
| H | 6.17934  | -2.11413 | -0.21625 |

|   |         |         |          |
|---|---------|---------|----------|
| O | 5.65752 | 0.54976 | 0.12893  |
| C | 5.96895 | 1.90198 | -0.11709 |
| H | 6.89713 | 2.23731 | 0.3114   |
| C | 5.00486 | 2.49936 | -0.86095 |
| H | 4.99616 | 3.52747 | -1.18744 |

### Path C

<sup>2</sup>RC<sub>C</sub>

|    |          |          |          |
|----|----------|----------|----------|
| Fe | -2.74512 | -0.00678 | 0.10705  |
| O  | -1.31564 | -0.35732 | -0.64099 |
| S  | -4.92635 | 0.90554  | 1.14444  |
| H  | -4.41703 | 1.31708  | 2.36224  |
| N  | -2.308   | 1.95939  | 0.31617  |
| C  | -1.3664  | 3.9499   | 1.0603   |
| C  | -1.92901 | 4.20202  | -0.15737 |
| H  | -0.84275 | 4.63502  | 1.71075  |
| H  | -1.95787 | 5.13481  | -0.70106 |
| N  | -3.71523 | 0.41319  | -1.61179 |
| C  | -3.72438 | 1.61999  | -2.29099 |
| C  | -4.43628 | 1.47833  | -3.54327 |
| C  | -4.8592  | 0.18314  | -3.61937 |
| H  | -4.58811 | 2.27653  | -4.25479 |
| H  | -5.42556 | -0.29249 | -4.4065  |
| N  | -3.4456  | -1.89032 | 0.0384   |
| C  | -4.17054 | -2.47215 | -0.98461 |
| C  | -3.2229  | -2.89366 | 0.96561  |
| C  | -4.40703 | -3.86972 | -0.69418 |
| C  | -3.82021 | -4.13056 | 0.51105  |
| H  | -4.95337 | -4.54588 | -1.33517 |
| H  | -3.79011 | -5.0631  | 1.05511  |
| N  | -2.01602 | -0.346   | 1.9575   |
| C  | -1.26253 | -1.42129 | 3.87152  |
| H  | -1.09637 | -2.22195 | 4.57709  |
| C  | -1.97753 | -1.56224 | 2.62207  |
| C  | -1.58789 | 2.55106  | 1.35224  |
| C  | -2.50707 | 2.96272  | -0.62769 |
| C  | -4.40398 | -0.48262 | -2.41786 |
| C  | -2.54061 | -2.74292 | 2.16404  |
| H  | -2.44012 | -3.62031 | 2.79418  |
| C  | -1.13361 | 1.89472  | 2.4818   |
| H  | -0.57593 | 2.47722  | 3.20738  |
| C  | -3.15184 | 2.8006   | -1.8407  |
| H  | -3.22965 | 3.66976  | -2.48495 |
| C  | -4.61868 | -1.81838 | -2.12531 |
| H  | -5.17901 | -2.40348 | -2.84679 |
| C  | -0.86293 | -0.11827 | 3.95815  |

|                        |          |          |          |
|------------------------|----------|----------|----------|
| H                      | -0.30376 | 0.36082  | 4.74829  |
| C                      | -1.33249 | 0.54825  | 2.76319  |
| C                      | 3.96463  | -1.44114 | -0.94064 |
| C                      | 5.18386  | -2.09615 | -1.10756 |
| C                      | 6.36591  | -1.40377 | -0.78322 |
| C                      | 6.30702  | -0.06934 | -0.30389 |
| C                      | 5.09092  | 0.61827  | -0.12714 |
| C                      | 3.945    | -0.10942 | -0.45186 |
| H                      | 7.73884  | -3.01496 | -1.2864  |
| H                      | 5.23616  | -3.11522 | -1.47453 |
| C                      | 7.67682  | -1.99407 | -0.92062 |
| C                      | 8.76554  | 0.0565   | -0.11833 |
| C                      | 8.80729  | -1.31163 | -0.60838 |
| H                      | 9.79308  | -1.74673 | -0.70847 |
| O                      | 7.46821  | 0.62332  | 0.01129  |
| O                      | 9.72977  | 0.75725  | 0.18813  |
| O                      | 5.1526   | 1.89894  | 0.37034  |
| C                      | 4.01236  | 2.8026   | 0.20138  |
| H                      | 3.14571  | 2.45426  | 0.76524  |
| H                      | 4.3686   | 3.7568   | 0.58736  |
| H                      | 3.74671  | 2.8971   | -0.85584 |
| O                      | 2.62419  | 0.32926  | -0.34761 |
| C                      | 1.81057  | -0.7444  | -0.78456 |
| H                      | 0.74644  | -0.55426 | -0.75824 |
| C                      | 2.57394  | -1.80731 | -1.14239 |
| H                      | 2.20726  | -2.75313 | -1.50916 |
| <b><sup>4</sup>RCc</b> |          |          |          |
| Fe                     | -2.7482  | 0.01229  | 0.10532  |
| O                      | -1.29661 | -0.41809 | -0.55892 |
| S                      | -5.00069 | 0.90651  | 0.94703  |
| H                      | -4.53606 | 1.69996  | 1.97951  |
| N                      | -2.50697 | 1.99237  | -0.20298 |
| C                      | -1.78664 | 4.19369  | -0.00599 |
| C                      | -2.3763  | 4.07201  | -1.2308  |
| H                      | -1.33862 | 5.07085  | 0.43735  |
| H                      | -2.50766 | 4.8302   | -1.98869 |
| N                      | -3.76097 | -0.11801 | -1.63321 |
| C                      | -3.89586 | 0.86842  | -2.59583 |
| C                      | -4.59864 | 0.34483  | -3.74758 |
| C                      | -4.89153 | -0.96057 | -3.4785  |
| H                      | -4.8346  | 0.91659  | -4.63295 |
| H                      | -5.41398 | -1.67271 | -4.10014 |
| N                      | -3.25691 | -1.88938 | 0.53852  |
| C                      | -3.9239  | -2.77926 | -0.28132 |
| C                      | -2.92395 | -2.59818 | 1.67929  |
| C                      | -4.01191 | -4.07468 | 0.35778  |

|   |          |          |          |
|---|----------|----------|----------|
| C | -3.39257 | -3.96295 | 1.56973  |
| H | -4.48916 | -4.94154 | -0.07503 |
| H | -3.26105 | -4.72008 | 2.32868  |
| N | -1.97288 | 0.22355  | 1.95726  |
| C | -1.10018 | -0.25517 | 4.05439  |
| H | -0.84752 | -0.83167 | 4.9321   |
| C | -1.80653 | -0.77598 | 2.90439  |
| C | -1.85375 | 2.89776  | 0.6317   |
| C | -2.81779 | 2.70121  | -1.35999 |
| C | -4.36398 | -1.2512  | -2.16276 |
| C | -2.25129 | -2.08237 | 2.77761  |
| H | -2.05658 | -2.75722 | 3.60442  |
| C | -1.32646 | 2.59858  | 1.87485  |
| H | -0.83166 | 3.39991  | 2.41329  |
| C | -3.44473 | 2.17459  | -2.4749  |
| H | -3.61442 | 2.84092  | -3.31376 |
| C | -4.44342 | -2.48219 | -1.53495 |
| H | -4.94773 | -3.28178 | -2.06717 |
| C | -0.83576 | 1.06003  | 3.79896  |
| H | -0.32352 | 1.77521  | 4.42557  |
| C | -1.37996 | 1.35399  | 2.49117  |
| C | 3.99405  | -1.49327 | -0.87557 |
| C | 5.21894  | -2.13454 | -1.05368 |
| C | 6.39626  | -1.42484 | -0.75031 |
| C | 6.32665  | -0.08808 | -0.2797  |
| C | 5.10447  | 0.58603  | -0.09177 |
| C | 3.96353  | -0.15784 | -0.39722 |
| H | 7.78303  | -3.02206 | -1.26007 |
| H | 5.27907  | -3.15553 | -1.41397 |
| C | 7.71274  | -1.99947 | -0.90061 |
| C | 8.78547  | 0.07029  | -0.12649 |
| C | 8.83835  | -1.30056 | -0.60784 |
| H | 9.82823  | -1.72383 | -0.71775 |
| O | 7.48282  | 0.62145  | 0.01596  |
| O | 9.74457  | 0.78518  | 0.16298  |
| O | 5.161    | 1.8721   | 0.39123  |
| C | 3.98672  | 2.74161  | 0.2994   |
| H | 3.16988  | 2.36786  | 0.91904  |
| H | 4.33985  | 3.70527  | 0.66421  |
| H | 3.64826  | 2.82897  | -0.73712 |
| O | 2.63825  | 0.26551  | -0.28242 |
| C | 1.83346  | -0.82162 | -0.70107 |
| H | 0.76763  | -0.6434  | -0.66595 |
| C | 2.60581  | -1.87811 | -1.0585  |
| H | 2.24696  | -2.83136 | -1.41359 |

<sup>2</sup>TS-Oc

|    |          |          |          |
|----|----------|----------|----------|
| Fe | -2.74512 | -0.00678 | 0.10705  |
| O  | -1.31564 | -0.35732 | -0.64099 |
| S  | -4.92635 | 0.90554  | 1.14444  |
| H  | -4.41703 | 1.31708  | 2.36224  |
| N  | -2.308   | 1.95939  | 0.31617  |
| C  | -1.3664  | 3.9499   | 1.0603   |
| C  | -1.92901 | 4.20202  | -0.15737 |
| H  | -0.84275 | 4.63502  | 1.71075  |
| H  | -1.95787 | 5.13481  | -0.70106 |
| N  | -3.71523 | 0.41319  | -1.61179 |
| C  | -3.72438 | 1.61999  | -2.29099 |
| C  | -4.43628 | 1.47833  | -3.54327 |
| C  | -4.8592  | 0.18314  | -3.61937 |
| H  | -4.58811 | 2.27653  | -4.25479 |
| H  | -5.42556 | -0.29249 | -4.4065  |
| N  | -3.4456  | -1.89032 | 0.0384   |
| C  | -4.17054 | -2.47215 | -0.98461 |
| C  | -3.2229  | -2.89366 | 0.96561  |
| C  | -4.40703 | -3.86972 | -0.69418 |
| C  | -3.82021 | -4.13056 | 0.51105  |
| H  | -4.95337 | -4.54588 | -1.33517 |
| H  | -3.79011 | -5.0631  | 1.05511  |
| N  | -2.01602 | -0.346   | 1.9575   |
| C  | -1.26253 | -1.42129 | 3.87152  |
| H  | -1.09637 | -2.22195 | 4.57709  |
| C  | -1.97753 | -1.56224 | 2.62207  |
| C  | -1.58789 | 2.55106  | 1.35224  |
| C  | -2.50707 | 2.96272  | -0.62769 |
| C  | -4.40398 | -0.48262 | -2.41786 |
| C  | -2.54061 | -2.74292 | 2.16404  |
| H  | -2.44012 | -3.62031 | 2.79418  |
| C  | -1.13361 | 1.89472  | 2.4818   |
| H  | -0.57593 | 2.47722  | 3.20738  |
| C  | -3.15184 | 2.8006   | -1.8407  |
| H  | -3.22965 | 3.66976  | -2.48495 |
| C  | -4.61868 | -1.81838 | -2.12531 |
| H  | -5.17901 | -2.40348 | -2.84679 |
| C  | -0.86293 | -0.11827 | 3.95815  |
| H  | -0.30376 | 0.36082  | 4.74829  |
| C  | -1.33249 | 0.54825  | 2.76319  |
| C  | 1.60581  | -2.65153 | 0.26255  |
| C  | 2.00103  | -3.77211 | 0.99161  |
| C  | 2.43719  | -3.58874 | 2.31749  |
| C  | 2.4751   | -2.28942 | 2.88692  |
| C  | 2.08421  | -1.13932 | 2.17458  |
| C  | 1.65032  | -1.36929 | 0.86806  |



|                                     |          |          |          |
|-------------------------------------|----------|----------|----------|
| H                                   | 2.84333  | -5.68543 | 2.7334   |
| H                                   | 1.97577  | -4.76758 | 0.56228  |
| C                                   | 2.86639  | -4.68451 | 3.15468  |
| C                                   | 3.33631  | -3.16654 | 5.02785  |
| C                                   | 3.28888  | -4.49069 | 4.42948  |
| H                                   | 3.61198  | -5.30629 | 5.06314  |
| O                                   | 2.91085  | -2.09873 | 4.19123  |
| O                                   | 3.70422  | -2.88829 | 6.16886  |
| O                                   | 2.13566  | 0.06508  | 2.83654  |
| C                                   | 2.14393  | 1.31608  | 2.07483  |
| H                                   | 1.19983  | 1.46389  | 1.54833  |
| H                                   | 2.29226  | 2.08717  | 2.82968  |
| H                                   | 2.96879  | 1.32612  | 1.35599  |
| O                                   | 1.19214  | -0.41053 | -0.03675 |
| C                                   | 0.48657  | -1.18016 | -1.14165 |
| H                                   | 0.10911  | -0.56355 | -1.94572 |
| C                                   | 1.09734  | -2.43558 | -1.08044 |
| H                                   | 0.93152  | -3.19149 | -1.83188 |
| <b><sup>4</sup>TS-O<sub>c</sub></b> |          |          |          |
| Fe                                  | -2.74512 | -0.00678 | 0.10705  |
| O                                   | -1.31564 | -0.35732 | -0.64099 |
| S                                   | -4.92635 | 0.90554  | 1.14444  |
| H                                   | -4.41703 | 1.31708  | 2.36224  |
| N                                   | -2.308   | 1.95939  | 0.31617  |
| C                                   | -1.3664  | 3.9499   | 1.0603   |
| C                                   | -1.92901 | 4.20202  | -0.15737 |
| H                                   | -0.84275 | 4.63502  | 1.71075  |
| H                                   | -1.95787 | 5.13481  | -0.70106 |
| N                                   | -3.71523 | 0.41319  | -1.61179 |
| C                                   | -3.72438 | 1.61999  | -2.29099 |
| C                                   | -4.43628 | 1.47833  | -3.54327 |
| C                                   | -4.8592  | 0.18314  | -3.61937 |
| H                                   | -4.58811 | 2.27653  | -4.25479 |
| H                                   | -5.42556 | -0.29249 | -4.4065  |
| N                                   | -3.4456  | -1.89032 | 0.0384   |
| C                                   | -4.17054 | -2.47215 | -0.98461 |
| C                                   | -3.2229  | -2.89366 | 0.96561  |
| C                                   | -4.40703 | -3.86972 | -0.69418 |
| C                                   | -3.82021 | -4.13056 | 0.51105  |
| H                                   | -4.95337 | -4.54588 | -1.33517 |
| H                                   | -3.79011 | -5.0631  | 1.05511  |
| N                                   | -2.01602 | -0.346   | 1.9575   |
| C                                   | -1.26253 | -1.42129 | 3.87152  |
| H                                   | -1.09637 | -2.22195 | 4.57709  |
| C                                   | -1.97753 | -1.56224 | 2.62207  |
| C                                   | -1.58789 | 2.55106  | 1.35224  |

|                               |          |          |          |
|-------------------------------|----------|----------|----------|
| C                             | -2.50707 | 2.96272  | -0.62769 |
| C                             | -4.40398 | -0.48262 | -2.41786 |
| C                             | -2.54061 | -2.74292 | 2.16404  |
| H                             | -2.44012 | -3.62031 | 2.79418  |
| C                             | -1.13361 | 1.89472  | 2.4818   |
| H                             | -0.57593 | 2.47722  | 3.20738  |
| C                             | -3.15184 | 2.8006   | -1.8407  |
| H                             | -3.22965 | 3.66976  | -2.48495 |
| C                             | -4.61868 | -1.81838 | -2.12531 |
| H                             | -5.17901 | -2.40348 | -2.84679 |
| C                             | -0.86293 | -0.11827 | 3.95815  |
| H                             | -0.30376 | 0.36082  | 4.74829  |
| C                             | -1.33249 | 0.54825  | 2.76319  |
| C                             | 1.60581  | -2.65153 | 0.26255  |
| C                             | 2.00103  | -3.77211 | 0.99161  |
| C                             | 2.43719  | -3.58874 | 2.31749  |
| C                             | 2.4751   | -2.28942 | 2.88692  |
| C                             | 2.08421  | -1.13932 | 2.17458  |
| C                             | 1.65032  | -1.36929 | 0.86806  |
| H                             | 2.84333  | -5.68543 | 2.7334   |
| H                             | 1.97577  | -4.76758 | 0.56228  |
| C                             | 2.86639  | -4.68451 | 3.15468  |
| C                             | 3.33631  | -3.16654 | 5.02785  |
| C                             | 3.28888  | -4.49069 | 4.42948  |
| H                             | 3.61198  | -5.30629 | 5.06314  |
| O                             | 2.91085  | -2.09873 | 4.19123  |
| O                             | 3.70422  | -2.88829 | 6.16886  |
| O                             | 2.13566  | 0.06508  | 2.83654  |
| C                             | 2.14393  | 1.31608  | 2.07483  |
| H                             | 1.19983  | 1.46389  | 1.54833  |
| H                             | 2.29226  | 2.08717  | 2.82968  |
| H                             | 2.96879  | 1.32612  | 1.35599  |
| O                             | 1.19214  | -0.41053 | -0.03675 |
| C                             | 0.48657  | -1.18016 | -1.14165 |
| H                             | 0.10911  | -0.56355 | -1.94572 |
| C                             | 1.09734  | -2.43558 | -1.08044 |
| H                             | 0.93152  | -3.19149 | -1.83188 |
| <sup>2</sup> INT <sub>c</sub> |          |          |          |
| Fe                            | -2.13249 | -0.2     | 0.27259  |
| O                             | -0.03118 | 0.26841  | -0.21576 |
| S                             | -4.26832 | -0.68164 | 0.93717  |
| H                             | -4.93308 | 0.18923  | 0.09414  |
| N                             | -1.62435 | -2.1507  | 0.24098  |
| C                             | -1.42781 | -4.37056 | -0.41348 |
| C                             | -0.99122 | -4.29216 | 0.87846  |
| H                             | -1.48666 | -5.24233 | -1.04917 |

|   |          |          |          |
|---|----------|----------|----------|
| H | -0.62386 | -5.08728 | 1.51103  |
| N | -1.50925 | -0.096   | 2.17732  |
| C | -1.01597 | -1.12168 | 2.9679   |
| C | -0.74657 | -0.63062 | 4.30407  |
| C | -1.08504 | 0.69103  | 4.31912  |
| H | -0.35467 | -1.23235 | 5.11113  |
| H | -1.02371 | 1.38966  | 5.14089  |
| N | -2.47053 | 1.78267  | 0.23645  |
| C | -2.38497 | 2.64077  | 1.3242   |
| C | -2.91856 | 2.55786  | -0.82743 |
| C | -2.77793 | 3.97678  | 0.92889  |
| C | -3.10242 | 3.92692  | -0.39697 |
| H | -2.79763 | 4.83032  | 1.59097  |
| H | -3.44215 | 4.73011  | -1.0347  |
| N | -2.59928 | -0.27514 | -1.69396 |
| C | -3.39249 | 0.25483  | -3.81329 |
| H | -3.76609 | 0.85841  | -4.62783 |
| C | -3.05094 | 0.76355  | -2.50406 |
| C | -1.82669 | -3.03607 | -0.8101  |
| C | -1.12396 | -2.91087 | 1.28917  |
| C | -1.55914 | 1.02435  | 2.99022  |
| C | -3.18031 | 2.08748  | -2.10672 |
| H | -3.54032 | 2.80018  | -2.84106 |
| C | -2.31466 | -2.70189 | -2.06555 |
| H | -2.42437 | -3.50438 | -2.78746 |
| C | -0.8262  | -2.43115 | 2.55552  |
| H | -0.44092 | -3.13727 | 3.28329  |
| C | -1.9705  | 2.28933  | 2.60002  |
| H | -1.95483 | 3.07197  | 3.35114  |
| C | -3.16496 | -1.09295 | -3.79304 |
| H | -3.31428 | -1.80812 | -4.5891  |
| C | -2.67457 | -1.42502 | -2.47353 |
| C | 2.23174  | -0.43087 | -1.01062 |
| C | 3.14915  | -1.44457 | -0.8023  |
| C | 4.48217  | -1.08901 | -0.49697 |
| C | 4.84004  | 0.2755   | -0.39399 |
| C | 3.91327  | 1.32758  | -0.59819 |
| C | 2.62321  | 0.92626  | -0.92504 |
| H | 5.256    | -3.11629 | -0.3329  |
| H | 2.8636   | -2.48896 | -0.85851 |
| C | 5.51858  | -2.06504 | -0.26106 |
| C | 7.17925  | -0.3041  | 0.15264  |
| C | 6.78976  | -1.69895 | 0.04301  |
| H | 7.57392  | -2.4231  | 0.2206   |
| O | 6.1316   | 0.64473  | -0.08323 |
| O | 8.29178  | 0.13831  | 0.4229   |

|                         |          |          |          |
|-------------------------|----------|----------|----------|
| O                       | 4.38838  | 2.61036  | -0.50482 |
| C                       | 3.46934  | 3.713    | -0.19258 |
| H                       | 2.90901  | 3.49633  | 0.72168  |
| H                       | 4.12466  | 4.56917  | -0.04151 |
| H                       | 2.77796  | 3.89246  | -1.01652 |
| O                       | 1.5582   | 1.79743  | -1.24752 |
| C                       | 0.40125  | 0.97832  | -1.43551 |
| H                       | -0.36172 | 1.4469   | -2.03456 |
| C                       | 0.7943   | -0.44751 | -1.33308 |
| H                       | 0.26757  | -1.27128 | -1.78986 |
| <b><sup>4</sup>INTc</b> |          |          |          |
| Fe                      | -2.1285  | 0.04001  | 0.25469  |
| O                       | -0.5208  | -0.58932 | -0.51457 |
| S                       | -4.12955 | 0.85519  | 1.29559  |
| H                       | -4.99279 | -0.09372 | 0.78267  |
| N                       | -3.13872 | -1.54095 | -0.47184 |
| C                       | -4.28051 | -2.96931 | -1.89244 |
| C                       | -4.03737 | -3.65808 | -0.7365  |
| H                       | -4.79197 | -3.31091 | -2.78051 |
| H                       | -4.30724 | -4.67553 | -0.49399 |
| N                       | -1.68488 | -1.01349 | 1.91387  |
| C                       | -2.0618  | -2.31324 | 2.20425  |
| C                       | -1.51728 | -2.70293 | 3.48781  |
| C                       | -0.81254 | -1.63631 | 3.96622  |
| H                       | -1.6631  | -3.67054 | 3.94517  |
| H                       | -0.26736 | -1.55366 | 4.89491  |
| N                       | -1.25925 | 1.66536  | 1.03807  |
| C                       | -0.56793 | 1.73204  | 2.23875  |
| C                       | -1.18908 | 2.93183  | 0.4741   |
| C                       | -0.06454 | 3.07093  | 2.43369  |
| C                       | -0.45392 | 3.81149  | 1.35224  |
| H                       | 0.50848  | 3.38804  | 3.29246  |
| H                       | -0.26406 | 4.8558   | 1.15152  |
| N                       | -2.57448 | 1.09154  | -1.41556 |
| C                       | -2.85451 | 2.81806  | -2.9337  |
| H                       | -2.79541 | 3.81294  | -3.35026 |
| C                       | -2.33649 | 2.44211  | -1.63853 |
| C                       | -3.71733 | -1.64955 | -1.73106 |
| C                       | -3.3125  | -2.77348 | 0.14492  |
| C                       | -0.92671 | -0.57642 | 2.98721  |
| C                       | -1.69747 | 3.30157  | -0.76075 |
| H                       | -1.57234 | 4.33389  | -1.06732 |
| C                       | -3.76512 | -0.65267 | -2.69256 |
| H                       | -4.26703 | -0.8801  | -3.62645 |
| C                       | -2.82934 | -3.1318  | 1.3932   |
| H                       | -3.04641 | -4.13306 | 1.74789  |

|                           |          |          |          |
|---------------------------|----------|----------|----------|
| C                         | -0.39376 | 0.69174  | 3.13702  |
| H                         | 0.18099  | 0.89444  | 4.03344  |
| C                         | -3.41332 | 1.69966  | -3.48643 |
| H                         | -3.90509 | 1.59962  | -4.44303 |
| C                         | -3.25562 | 0.62583  | -2.53207 |
| C                         | 2.54951  | -0.99523 | -1.57445 |
| C                         | 3.6898   | -1.7947  | -1.78058 |
| C                         | 4.90179  | -1.42179 | -1.1773  |
| C                         | 4.96026  | -0.24763 | -0.37247 |
| C                         | 3.83085  | 0.56611  | -0.13203 |
| C                         | 2.64428  | 0.17143  | -0.73797 |
| H                         | 6.0919   | -3.07093 | -1.9447  |
| H                         | 3.641    | -2.68766 | -2.39407 |
| C                         | 6.12215  | -2.17224 | -1.33549 |
| C                         | 7.36938  | -0.59033 | 0.06691  |
| C                         | 7.28556  | -1.78642 | -0.74876 |
| H                         | 8.20432  | -2.34653 | -0.86227 |
| O                         | 6.14615  | 0.14172  | 0.21215  |
| O                         | 8.36362  | -0.14314 | 0.63469  |
| O                         | 3.9598   | 1.64056  | 0.72813  |
| C                         | 3.43344  | 2.93825  | 0.28141  |
| H                         | 2.34965  | 2.89845  | 0.16292  |
| H                         | 3.70942  | 3.63311  | 1.07378  |
| H                         | 3.91055  | 3.23669  | -0.6587  |
| O                         | 1.44293  | 0.82124  | -0.62526 |
| C                         | 0.38314  | -0.01304 | -1.38895 |
| H                         | -0.08081 | 0.7178   | -2.05914 |
| C                         | 1.22497  | -1.08222 | -2.02432 |
| H                         | 0.7908   | -1.85871 | -2.63675 |
| <b><sup>2</sup>P-epoc</b> |          |          |          |
| Fe                        | -2.13536 | -0.1851  | 0.26205  |
| O                         | -0.02578 | 0.26346  | -0.19729 |
| S                         | -4.30239 | -0.64547 | 0.83552  |
| H                         | -4.45943 | 0.34586  | 1.78603  |
| N                         | -2.44457 | 1.80231  | 0.18867  |
| C                         | -2.69614 | 4.03688  | 0.76947  |
| C                         | -3.10025 | 3.91117  | -0.52925 |
| H                         | -2.67276 | 4.92765  | 1.38033  |
| H                         | -3.4718  | 4.67894  | -1.19244 |
| N                         | -2.55228 | -0.34    | -1.71229 |
| C                         | -3.05972 | 0.67086  | -2.52159 |
| C                         | -3.36712 | 0.14362  | -3.83358 |
| C                         | -3.05763 | -1.1871  | -3.81644 |
| H                         | -3.77288 | 0.72584  | -4.64828 |
| H                         | -3.16179 | -1.90895 | -4.61355 |
| N                         | -1.65747 | -2.14381 | 0.27137  |

|   |          |          |          |
|---|----------|----------|----------|
| C | -1.76842 | -3.05675 | -0.77026 |
| C | -1.26937 | -2.87837 | 1.38256  |
| C | -1.42045 | -4.38225 | -0.30433 |
| C | -1.11643 | -4.27265 | 1.02277  |
| H | -1.42641 | -5.27027 | -0.91977 |
| H | -0.82119 | -5.05339 | 1.70883  |
| N | -1.56403 | -0.00184 | 2.17523  |
| C | -0.88426 | -0.51358 | 4.33441  |
| H | -0.55975 | -1.11399 | 5.17191  |
| C | -1.17431 | -1.03443 | 3.01374  |
| C | -2.29376 | 2.722    | 1.219    |
| C | -2.94467 | 2.51815  | -0.89177 |
| C | -2.56151 | -1.4915  | -2.49262 |
| C | -1.0465  | -2.36679 | 2.65173  |
| H | -0.73816 | -3.06466 | 3.42304  |
| C | -1.85276 | 2.42348  | 2.49912  |
| H | -1.78067 | 3.23983  | 3.20978  |
| C | -3.23442 | 1.99489  | -2.14419 |
| H | -3.63025 | 2.67703  | -2.88921 |
| C | -2.17741 | -2.75331 | -2.06134 |
| H | -2.23383 | -3.56761 | -2.77587 |
| C | -1.09319 | 0.83463  | 4.28944  |
| H | -0.97595 | 1.55841  | 5.08288  |
| C | -1.51926 | 1.15293  | 2.94271  |
| C | 2.23523  | -0.45916 | -0.9772  |
| C | 3.14675  | -1.47366 | -0.7484  |
| C | 4.48155  | -1.11946 | -0.44923 |
| C | 4.84707  | 0.24463  | -0.37372 |
| C | 3.92628  | 1.29789  | -0.59886 |
| C | 2.63385  | 0.89722  | -0.91716 |
| H | 5.24399  | -3.14733 | -0.24438 |
| H | 2.85546  | -2.51734 | -0.78463 |
| C | 5.51257  | -2.09636 | -0.19396 |
| C | 7.18342  | -0.3368  | 0.18293  |
| C | 6.78597  | -1.73137 | 0.10199  |
| H | 7.56614  | -2.45619 | 0.2938   |
| O | 6.14094  | 0.61288  | -0.07113 |
| O | 8.29876  | 0.10467  | 0.44311  |
| O | 4.41068  | 2.57848  | -0.52898 |
| C | 3.49633  | 3.6994   | -0.27578 |
| H | 2.91067  | 3.51877  | 0.63027  |
| H | 4.15708  | 4.55337  | -0.13625 |
| H | 2.82787  | 3.85909  | -1.12246 |
| O | 1.5722   | 1.76727  | -1.2561  |
| C | 0.41298  | 0.95013  | -1.4308  |
| H | -0.3484  | 1.41115  | -2.03769 |

|                           |          |          |          |
|---------------------------|----------|----------|----------|
| C                         | 0.79811  | -0.47489 | -1.30205 |
| H                         | 0.26833  | -1.30348 | -1.74578 |
| <b><sup>4</sup>P-epoc</b> |          |          |          |
| Fe                        | -1.918   | -0.15399 | 0.56334  |
| O                         | -0.56703 | 0.12102  | -1.45701 |
| S                         | -3.31306 | -0.49619 | 2.45761  |
| H                         | -2.65185 | 0.32225  | 3.35428  |
| N                         | -2.96328 | 1.48489  | -0.22262 |
| C                         | -3.79422 | 3.6189   | -0.53325 |
| C                         | -4.60187 | 2.76293  | -1.23271 |
| H                         | -3.88169 | 4.69231  | -0.44468 |
| H                         | -5.47408 | 3.00528  | -1.82282 |
| N                         | -3.0553  | -1.40018 | -0.53511 |
| C                         | -4.18321 | -1.05086 | -1.26585 |
| C                         | -4.78498 | -2.25413 | -1.80794 |
| C                         | -4.0152  | -3.31127 | -1.41207 |
| H                         | -5.67709 | -2.27029 | -2.41718 |
| H                         | -4.15602 | -4.35907 | -1.63496 |
| N                         | -0.59356 | -1.73645 | 0.95454  |
| C                         | -0.79529 | -3.0646  | 0.63446  |
| C                         | 0.53886  | -1.67357 | 1.7419   |
| C                         | 0.27022  | -3.86398 | 1.21183  |
| C                         | 1.09282  | -3.00646 | 1.89352  |
| H                         | 0.35651  | -4.9376  | 1.12216  |
| H                         | 1.9782   | -3.24694 | 2.46467  |
| N                         | -0.67473 | 1.11011  | 1.50929  |
| C                         | 1.02461  | 1.95758  | 2.82766  |
| H                         | 1.91252  | 1.97388  | 3.44299  |
| C                         | 0.46251  | 0.76261  | 2.23069  |
| C                         | -2.77396 | 2.81152  | 0.11099  |
| C                         | -4.08572 | 1.42187  | -1.02397 |
| C                         | -2.92291 | -2.78034 | -0.61913 |
| C                         | 1.02256  | -0.50909 | 2.33329  |
| H                         | 1.92068  | -0.59564 | 2.93637  |
| C                         | -1.78204 | 3.2699   | 0.97369  |
| H                         | -1.74575 | 4.33763  | 1.16493  |
| C                         | -4.64986 | 0.24087  | -1.49987 |
| H                         | -5.54539 | 0.3305   | -2.10648 |
| C                         | -1.88441 | -3.54383 | -0.09026 |
| H                         | -1.93446 | -4.61495 | -0.25864 |
| C                         | 0.2382   | 3.01234  | 2.45294  |
| H                         | 0.35708  | 4.05561  | 2.70809  |
| C                         | -0.82257 | 2.48839  | 1.61505  |
| C                         | 1.82018  | -0.55163 | -1.81256 |
| C                         | 2.69574  | -1.55603 | -1.44353 |
| C                         | 3.95435  | -1.18893 | -0.91678 |

|   |          |          |          |
|---|----------|----------|----------|
| C | 4.27914  | 0.17866  | -0.75996 |
| C | 3.39364  | 1.22147  | -1.12557 |
| C | 2.18133  | 0.80843  | -1.66742 |
| H | 4.70186  | -3.20944 | -0.61426 |
| H | 2.42838  | -2.60284 | -1.53069 |
| C | 4.94105  | -2.15614 | -0.50198 |
| C | 6.49235  | -0.38162 | 0.18613  |
| C | 6.13874  | -1.77967 | 0.0147   |
| H | 6.88643  | -2.49723 | 0.32607  |
| O | 5.49561  | 0.55843  | -0.23056 |
| O | 7.53749  | 0.06933  | 0.64664  |
| O | 3.83519  | 2.51052  | -0.969   |
| C | 2.86598  | 3.59308  | -0.7436  |
| H | 2.23082  | 3.36068  | 0.11627  |
| H | 3.48623  | 4.46308  | -0.5335  |
| H | 2.25097  | 3.75847  | -1.62872 |
| O | 1.18369  | 1.6716   | -2.17075 |
| C | 0.07474  | 0.84434  | -2.54852 |
| H | -0.55573 | 1.31464  | -3.28634 |
| C | 0.45485  | -0.58405 | -2.37115 |
| H | 0.04403  | -1.41348 | -2.92779 |

### Path C catalyzed by phenylalanine

<sup>2</sup>RC<sub>ph</sub>

|    |          |          |          |
|----|----------|----------|----------|
| Fe | -3.37873 | -0.25778 | -0.07117 |
| O  | -1.81695 | -0.18942 | 0.49944  |
| S  | -5.74747 | -0.00626 | -0.94689 |
| H  | -5.46676 | -0.03156 | -2.30022 |
| N  | -2.86148 | -1.24067 | -1.7533  |
| C  | -1.9941  | -1.73396 | -3.84678 |
| C  | -2.23469 | -2.92441 | -3.22238 |
| H  | -1.58979 | -1.56247 | -4.83326 |
| H  | -2.06889 | -3.92404 | -3.59611 |
| N  | -3.82672 | -2.00663 | 0.81475  |
| C  | -3.62312 | -3.27527 | 0.29912  |
| C  | -4.00298 | -4.27314 | 1.27329  |
| C  | -4.43921 | -3.60261 | 2.38113  |
| H  | -3.94214 | -5.33976 | 1.11503  |
| H  | -4.80768 | -4.0107  | 3.31073  |
| N  | -4.15191 | 0.73326  | 1.50818  |
| C  | -4.6065  | 0.17962  | 2.69766  |
| C  | -4.22614 | 2.1061   | 1.67615  |
| C  | -4.97849 | 1.22927  | 3.62042  |
| C  | -4.74057 | 2.41712  | 2.99186  |
| H  | -5.36837 | 1.06222  | 4.61362  |
| H  | -4.897   | 3.41767  | 3.36686  |



|   |          |          |          |
|---|----------|----------|----------|
| N | -3.2091  | 1.4936   | -1.06577 |
| C | -3.04909 | 3.76325  | -1.53398 |
| H | -3.11961 | 4.82989  | -1.38073 |
| C | -3.41083 | 2.77039  | -0.54789 |
| C | -2.38471 | -0.68831 | -2.92842 |
| C | -2.76955 | -2.61492 | -1.9152  |
| C | -4.32872 | -2.1911  | 2.09008  |
| C | -3.87088 | 3.05207  | 0.72568  |
| H | -3.97059 | 4.09654  | 1.00017  |
| C | -2.30662 | 0.67057  | -3.20411 |
| H | -1.89459 | 0.9612   | -4.1635  |
| C | -3.1323  | -3.55845 | -0.96765 |
| H | -3.01824 | -4.60349 | -1.23541 |
| C | -4.69078 | -1.17546 | 2.96607  |
| H | -5.07147 | -1.46893 | 3.93854  |
| C | -2.6122  | 3.09408  | -2.64019 |
| H | -2.24953 | 3.50331  | -3.57128 |
| C | -2.69833 | 1.68198  | -2.34759 |
| C | 2.99127  | -2.52916 | 1.7609   |
| C | 4.20998  | -3.01249 | 2.23732  |
| C | 5.34858  | -2.89629 | 1.41739  |
| C | 5.25106  | -2.3023  | 0.12869  |
| C | 4.03716  | -1.80453 | -0.37385 |
| C | 2.94005  | -1.93701 | 0.47495  |
| H | 6.7452   | -3.81679 | 2.80971  |
| H | 4.29727  | -3.46409 | 3.21953  |
| C | 6.652    | -3.36529 | 1.82621  |
| C | 7.65593  | -2.65943 | -0.30218 |
| C | 7.73913  | -3.2532  | 1.02217  |
| H | 8.71919  | -3.60069 | 1.32168  |
| O | 6.36583  | -2.19673 | -0.68923 |
| O | 8.57564  | -2.52475 | -1.10745 |
| O | 4.01713  | -1.17394 | -1.6031  |
| C | 2.91909  | -1.50872 | -2.53723 |
| H | 1.99016  | -1.02784 | -2.23019 |
| H | 3.25464  | -1.11735 | -3.49697 |
| H | 2.8018   | -2.5951  | -2.59509 |
| O | 1.64914  | -1.4967  | 0.20985  |
| C | 0.87731  | -1.8163  | 1.35251  |
| H | -0.15352 | -1.5046  | 1.29108  |
| C | 1.64061  | -2.43387 | 2.28937  |
| H | 1.30478  | -2.77719 | 3.25523  |
| C | 5.4957   | 5.3803   | 0.22073  |
| C | 4.44132  | 4.69264  | -0.38918 |
| C | 3.23403  | 4.47594  | 0.30098  |
| C | 3.11495  | 4.96731  | 1.61287  |

|                                    |          |          |          |
|------------------------------------|----------|----------|----------|
| C                                  | 4.16852  | 5.65763  | 2.22339  |
| C                                  | 5.36379  | 5.86748  | 1.52733  |
| H                                  | 6.42198  | 5.53554  | -0.32469 |
| H                                  | 4.55082  | 4.2908   | -1.38937 |
| H                                  | 2.18826  | 4.80699  | 2.15817  |
| H                                  | 4.05476  | 6.03003  | 3.23736  |
| H                                  | 6.18317  | 6.40379  | 1.99655  |
| C                                  | 2.07813  | 3.73042  | -0.33533 |
| C                                  | 2.35289  | 2.20762  | -0.55508 |
| H                                  | 1.83617  | 4.16043  | -1.31744 |
| H                                  | 1.1887   | 3.83503  | 0.29519  |
| H                                  | 2.79378  | 1.81089  | 0.36503  |
| C                                  | 1.02009  | 1.47981  | -0.75725 |
| O                                  | 0.64634  | 1.00621  | -1.84518 |
| O                                  | 0.28392  | 1.43348  | 0.37918  |
| N                                  | 3.28272  | 1.98688  | -1.65368 |
| H                                  | 2.83997  | 2.07884  | -2.56351 |
| H                                  | 3.81018  | 1.12026  | -1.58816 |
| H                                  | -0.54994 | 0.86889  | 0.32086  |
| <b><sup>4</sup>RC<sub>ph</sub></b> |          |          |          |
| Fe                                 | -3.37899 | -0.25578 | -0.07437 |
| O                                  | -1.8169  | -0.22167 | 0.50224  |
| S                                  | -5.74506 | -0.05281 | -0.92772 |
| H                                  | -5.4752  | -0.07507 | -2.28325 |
| N                                  | -2.85795 | -1.2429  | -1.75495 |
| C                                  | -1.99465 | -1.73846 | -3.84954 |
| C                                  | -2.22773 | -2.92822 | -3.22114 |
| H                                  | -1.59405 | -1.56769 | -4.83765 |
| H                                  | -2.05811 | -3.92806 | -3.59259 |
| N                                  | -3.8117  | -2.01334 | 0.82104  |
| C                                  | -3.60137 | -3.28011 | 0.30681  |
| C                                  | -3.96415 | -4.27942 | 1.28648  |
| C                                  | -4.39644 | -3.6097  | 2.3966   |
| H                                  | -3.89486 | -5.34589 | 1.13056  |
| H                                  | -4.75277 | -4.01843 | 3.33064  |
| N                                  | -4.14641 | 0.72931  | 1.50931  |
| C                                  | -4.59284 | 0.17313  | 2.70185  |
| C                                  | -4.23536 | 2.10089  | 1.67441  |
| C                                  | -4.97185 | 1.22164  | 3.62318  |
| C                                  | -4.74823 | 2.41033  | 2.991    |
| H                                  | -5.35705 | 1.05314  | 4.61797  |
| H                                  | -4.91381 | 3.41016  | 3.36395  |
| N                                  | -3.22119 | 1.48547  | -1.0679  |
| C                                  | -3.10064 | 3.75521  | -1.55106 |
| H                                  | -3.1867  | 4.82151  | -1.40353 |
| C                                  | -3.43999 | 2.76334  | -0.5566  |

|   |          |          |          |
|---|----------|----------|----------|
| C | -2.38862 | -0.69249 | -2.93282 |
| C | -2.76073 | -2.61798 | -1.91306 |
| C | -4.30071 | -2.198   | 2.09998  |
| C | -3.89479 | 3.04677  | 0.71804  |
| H | -4.00524 | 4.09143  | 0.98757  |
| C | -2.325   | 0.66664  | -3.21242 |
| H | -1.92226 | 0.95951  | -4.17509 |
| C | -3.11614 | -3.56146 | -0.96319 |
| H | -2.99785 | -4.60622 | -1.23039 |
| C | -4.6654  | -1.18139 | 2.9747   |
| H | -5.03881 | -1.4742  | 3.95021  |
| C | -2.66195 | 3.08646  | -2.6567  |
| H | -2.31328 | 3.49597  | -3.59302 |
| C | -2.72425 | 1.67499  | -2.35655 |
| C | 3.01209  | -2.53543 | 1.75314  |
| C | 4.23454  | -3.01105 | 2.22773  |
| C | 5.37244  | -2.8817  | 1.40881  |
| C | 5.27052  | -2.28255 | 0.12283  |
| C | 4.05278  | -1.79229 | -0.37776 |
| C | 2.9565   | -1.93761 | 0.47001  |
| H | 6.77599  | -3.79731 | 2.79738  |
| H | 4.32518  | -3.46661 | 3.20779  |
| C | 6.67949  | -3.34196 | 1.81598  |
| C | 7.67841  | -2.61798 | -0.30868 |
| C | 7.76596  | -3.21721 | 1.01293  |
| H | 8.74873  | -3.55806 | 1.31123  |
| O | 6.38466  | -2.16418 | -0.69419 |
| O | 8.59729  | -2.47195 | -1.1129  |
| O | 4.02768  | -1.1561  | -1.60411 |
| C | 2.93403  | -1.49812 | -2.5408  |
| H | 1.99949  | -1.02966 | -2.23156 |
| H | 3.26549  | -1.09756 | -3.49816 |
| H | 2.82925  | -2.58543 | -2.60483 |
| O | 1.66215  | -1.50658 | 0.20648  |
| C | 0.89251  | -1.83805 | 1.34727  |
| H | -0.14077 | -1.53448 | 1.28699  |
| C | 1.66049  | -2.45378 | 2.28149  |
| H | 1.3271   | -2.80453 | 3.24552  |
| C | 5.45329  | 5.41084  | 0.21928  |
| C | 4.40354  | 4.71391  | -0.38809 |
| C | 3.20091  | 4.48412  | 0.30593  |
| C | 3.08164  | 4.97204  | 1.61909  |
| C | 4.13054  | 5.67162  | 2.2271   |
| C | 5.32122  | 5.8944   | 1.5272   |
| H | 6.37603  | 5.57614  | -0.32914 |
| H | 4.51357  | 4.31514  | -1.38945 |

|                                      |          |          |          |
|--------------------------------------|----------|----------|----------|
| H                                    | 2.1585   | 4.8017   | 2.16736  |
| H                                    | 4.01673  | 6.04114  | 3.24211  |
| H                                    | 6.13696  | 6.4379   | 1.99448  |
| C                                    | 2.05014  | 3.72845  | -0.32767 |
| C                                    | 2.33808  | 2.20826  | -0.5485  |
| H                                    | 1.80176  | 4.1566   | -1.30898 |
| H                                    | 1.1614   | 3.82484  | 0.30516  |
| H                                    | 2.78366  | 1.81484  | 0.37073  |
| C                                    | 1.0113   | 1.46897  | -0.74942 |
| O                                    | 0.63842  | 0.99498  | -1.83721 |
| O                                    | 0.27878  | 1.41265  | 0.38935  |
| H                                    | -0.55061 | 0.84244  | 0.32986  |
| N                                    | 3.26795  | 1.99604  | -1.64846 |
| H                                    | 2.82395  | 2.08617  | -2.55781 |
| H                                    | 3.8031   | 1.13403  | -1.58453 |
| <b><sup>2</sup>TS-O<sub>ph</sub></b> |          |          |          |
| Fe                                   | 2.93127  | -0.53676 | 0.12035  |
| O                                    | 1.42327  | 0.34803  | -0.09408 |
| S                                    | 4.77827  | -2.10058 | 0.54398  |
| H                                    | 4.51532  | -3.01308 | -0.45966 |
| N                                    | 2.9585   | -0.97777 | -1.84934 |
| C                                    | 2.47421  | -1.88719 | -3.92863 |
| C                                    | 3.28186  | -0.80823 | -4.14192 |
| H                                    | 2.04137  | -2.55624 | -4.65736 |
| H                                    | 3.64667  | -0.41853 | -5.08085 |
| N                                    | 4.17641  | 1.01193  | -0.17958 |
| C                                    | 4.668    | 1.446    | -1.40205 |
| C                                    | 5.55595  | 2.57073  | -1.2074  |
| C                                    | 5.61619  | 2.80658  | 0.13776  |
| H                                    | 6.06713  | 3.09394  | -2.00218 |
| H                                    | 6.1856   | 3.56098  | 0.66059  |
| N                                    | 3.04014  | -0.21015 | 2.10493  |
| C                                    | 3.75128  | 0.78384  | 2.76466  |
| C                                    | 2.37199  | -0.92016 | 3.09118  |
| C                                    | 3.51769  | 0.69541  | 4.18953  |
| C                                    | 2.66341  | -0.35179 | 4.38993  |
| H                                    | 3.96041  | 1.34941  | 4.9265   |
| H                                    | 2.26903  | -0.72441 | 5.32395  |
| N                                    | 1.80848  | -2.19841 | 0.43861  |
| C                                    | 0.49734  | -3.81266 | 1.47004  |
| H                                    | 0.00266  | -4.3499  | 2.26575  |
| C                                    | 1.31584  | -2.6331  | 1.66074  |
| C                                    | 2.27239  | -1.98809 | -2.49861 |
| C                                    | 3.57881  | -0.23936 | -2.8432  |
| C                                    | 4.76238  | 1.83076  | 0.77637  |
| C                                    | 1.56455  | -2.03029 | 2.88281  |

|   |          |          |          |
|---|----------|----------|----------|
| H | 1.10476  | -2.47752 | 3.75785  |
| C | 1.50653  | -2.96738 | -1.87766 |
| H | 1.02634  | -3.70166 | -2.51516 |
| C | 4.37597  | 0.87588  | -2.63472 |
| H | 4.81918  | 1.33869  | -3.51041 |
| C | 4.55815  | 1.72724  | 2.14631  |
| H | 5.07183  | 2.44017  | 2.78278  |
| C | 0.48602  | -4.08343 | 0.13263  |
| H | -0.02022 | -4.8852  | -0.38444 |
| C | 1.29411  | -3.07015 | -0.51309 |
| C | -0.80323 | 2.61673  | 1.17252  |
| C | -1.90165 | 2.69682  | 2.03417  |
| C | -3.17866 | 2.85281  | 1.47084  |
| C | -3.33469 | 2.92052  | 0.0605   |
| C | -2.24534 | 2.85533  | -0.83809 |
| C | -0.99844 | 2.72071  | -0.23428 |
| H | -4.27615 | 2.88527  | 3.34967  |
| H | -1.78505 | 2.62316  | 3.10929  |
| C | -4.37997 | 2.93479  | 2.26989  |
| C | -5.79131 | 3.1278   | 0.26936  |
| C | -5.60805 | 3.06761  | 1.70939  |
| H | -6.51125 | 3.13002  | 2.30193  |
| O | -4.5931  | 3.03077  | -0.50647 |
| O | -6.85117 | 3.24741  | -0.33904 |
| O | -2.53981 | 2.92949  | -2.17303 |
| C | -1.49099 | 2.72057  | -3.1883  |
| H | -1.07108 | 1.71771  | -3.09661 |
| H | -2.02189 | 2.83522  | -4.13224 |
| H | -0.7115  | 3.4789   | -3.09306 |
| O | 0.23467  | 2.62064  | -0.88569 |
| C | 1.19565  | 2.35244  | 0.11024  |
| H | 2.21605  | 2.47703  | -0.20169 |
| C | 0.60351  | 2.42764  | 1.36789  |
| H | 1.11864  | 2.29782  | 2.30576  |
| C | -7.13785 | -2.99498 | -0.2166  |
| C | -5.92999 | -2.63097 | -0.82079 |
| C | -4.70799 | -2.82036 | -0.14803 |
| C | -4.73249 | -3.38441 | 1.13959  |
| C | -5.94049 | -3.75225 | 1.74361  |
| C | -7.14888 | -3.55882 | 1.06559  |
| H | -8.07201 | -2.83794 | -0.7477  |
| H | -5.9199  | -2.17062 | -1.80154 |
| H | -3.79589 | -3.53721 | 1.6702   |
| H | -5.93686 | -4.18888 | 2.73822  |
| H | -8.08821 | -3.84402 | 1.52976  |
| C | -3.38668 | -2.43021 | -0.77941 |

|                                      |          |          |          |
|--------------------------------------|----------|----------|----------|
| C                                    | -3.20636 | -0.89038 | -0.97152 |
| H                                    | -3.27902 | -2.89261 | -1.77036 |
| H                                    | -2.56453 | -2.801   | -0.156   |
| H                                    | -3.51165 | -0.39585 | -0.04529 |
| C                                    | -1.72001 | -0.59243 | -1.18345 |
| O                                    | -1.21389 | -0.43729 | -2.31124 |
| O                                    | -1.02529 | -0.53687 | -0.0272  |
| H                                    | -0.04484 | -0.25008 | -0.1164  |
| N                                    | -4.026   | -0.39048 | -2.07149 |
| H                                    | -3.59887 | -0.56881 | -2.97675 |
| H                                    | -4.29413 | 0.5851   | -1.98196 |
| <b><sup>4</sup>TS-O<sub>ph</sub></b> |          |          |          |
| Fe                                   | -2.86879 | 0.55817  | 0.11275  |
| O                                    | -1.42255 | -0.42622 | -0.13445 |
| S                                    | -4.81704 | 2.02083  | 0.62943  |
| H                                    | -4.3253  | 3.21292  | 0.13142  |
| N                                    | -2.6414  | 1.3658   | -1.71382 |
| C                                    | -1.93984 | 2.6793   | -3.49394 |
| C                                    | -2.66548 | 1.65118  | -4.01891 |
| H                                    | -1.44679 | 3.48725  | -4.01362 |
| H                                    | -2.89148 | 1.45079  | -5.05582 |
| N                                    | -4.11929 | -0.84873 | -0.63503 |
| C                                    | -4.40445 | -1.05218 | -1.97152 |
| C                                    | -5.31872 | -2.16211 | -2.12025 |
| C                                    | -5.59671 | -2.62197 | -0.86175 |
| H                                    | -5.69698 | -2.52576 | -3.06433 |
| H                                    | -6.24385 | -3.43765 | -0.5744  |
| N                                    | -3.23563 | -0.16411 | 1.9738   |
| C                                    | -4.06301 | -1.22443 | 2.32829  |
| C                                    | -2.66349 | 0.28166  | 3.15097  |
| C                                    | -3.99514 | -1.44586 | 3.75716  |
| C                                    | -3.12415 | -0.5231  | 4.2637   |
| H                                    | -4.54926 | -2.20601 | 4.2882   |
| H                                    | -2.82844 | -0.37552 | 5.29209  |
| N                                    | -1.82997 | 2.0776   | 0.89569  |
| C                                    | -0.65088 | 3.41654  | 2.38443  |
| H                                    | -0.24132 | 3.75953  | 3.32311  |
| C                                    | -1.46157 | 2.22872  | 2.23115  |
| C                                    | -1.92645 | 2.49431  | -2.05701 |
| C                                    | -3.10797 | 0.83309  | -2.90686 |
| C                                    | -4.84455 | -1.80195 | 0.06044  |
| C                                    | -1.81958 | 1.38025  | 3.26392  |
| H                                    | -1.44448 | 1.61896  | 4.25356  |
| C                                    | -1.28641 | 3.33541  | -1.15287 |
| H                                    | -0.76205 | 4.19546  | -1.55509 |
| C                                    | -3.91728 | -0.28321 | -3.02544 |

|   |          |          |          |
|---|----------|----------|----------|
| H | -4.22085 | -0.57071 | -4.02677 |
| C | -4.82258 | -1.9711  | 1.44194  |
| H | -5.43545 | -2.76519 | 1.85567  |
| C | -0.5215  | 3.9826   | 1.1493   |
| H | 0.01645  | 4.87862  | 0.87667  |
| C | -1.23924 | 3.14261  | 0.21675  |
| C | 0.78802  | -2.67653 | 1.16439  |
| C | 1.89021  | -2.76719 | 2.01981  |
| C | 3.16676  | -2.90963 | 1.44898  |
| C | 3.31705  | -2.9559  | 0.03838  |
| C | 2.2224   | -2.88417 | -0.85473 |
| C | 0.97813  | -2.76069 | -0.24455 |
| H | 4.27168  | -2.96675 | 3.32264  |
| H | 1.77816  | -2.71052 | 3.09651  |
| C | 4.37127  | -2.99866 | 2.24173  |
| C | 5.77563  | -3.1529  | 0.23306  |
| C | 5.59799  | -3.11702 | 1.67437  |
| H | 6.50377  | -3.1848  | 2.26239  |
| O | 4.57422  | -3.05067 | -0.53593 |
| O | 6.83431  | -3.25561 | -0.38135 |
| O | 2.51262  | -2.9431  | -2.19164 |
| C | 1.45693  | -2.74264 | -3.20058 |
| H | 1.02775  | -1.74433 | -3.1042  |
| H | 1.984    | -2.84953 | -4.14767 |
| H | 0.68553  | -3.50911 | -3.10332 |
| O | -0.25904 | -2.65555 | -0.89081 |
| C | -1.21646 | -2.38359 | 0.11082  |
| H | -2.23439 | -2.54056 | -0.19537 |
| C | -0.61834 | -2.49603 | 1.36936  |
| H | -1.12919 | -2.38857 | 2.31248  |
| C | 7.05186  | 3.10893  | -0.20804 |
| C | 5.85467  | 2.71055  | -0.81169 |
| C | 4.62746  | 2.87152  | -0.14112 |
| C | 4.6355   | 3.44156  | 1.14404  |
| C | 5.83283  | 3.84374  | 1.74748  |
| C | 7.04658  | 3.67903  | 1.07144  |
| H | 7.99045  | 2.97368  | -0.7373  |
| H | 5.85739  | 2.24453  | -1.78977 |
| H | 3.69458  | 3.57105  | 1.67328  |
| H | 5.81678  | 4.28433  | 2.74021  |
| H | 7.97761  | 3.99083  | 1.53522  |
| C | 3.31758  | 2.44558  | -0.77305 |
| C | 3.17524  | 0.9016   | -0.96281 |
| H | 3.1981   | 2.90392  | -1.76457 |
| H | 2.486    | 2.79503  | -0.14955 |
| H | 3.4833   | 0.41613  | -0.03273 |

|                                     |          |          |          |
|-------------------------------------|----------|----------|----------|
| C                                   | 1.69747  | 0.57005  | -1.18854 |
| O                                   | 1.20841  | 0.39784  | -2.32097 |
| O                                   | 0.99136  | 0.5072   | -0.03977 |
| H                                   | 0.01898  | 0.18833  | -0.13924 |
| N                                   | 4.01439  | 0.41725  | -2.05488 |
| H                                   | 3.58735  | 0.57979  | -2.96332 |
| H                                   | 4.303    | -0.55197 | -1.95914 |
| <b><sup>2</sup>INT<sub>ph</sub></b> |          |          |          |
| Fe                                  | -3.12594 | 0.26916  | 0.55617  |
| O                                   | -1.45123 | -0.45575 | -0.60075 |
| S                                   | -4.83946 | 1.08081  | 1.83745  |
| H                                   | -4.6526  | 2.4251   | 1.57591  |
| N                                   | -3.54368 | 1.49639  | -0.98497 |
| C                                   | -3.65783 | 3.33865  | -2.3956  |
| C                                   | -4.54376 | 2.41374  | -2.8695  |
| H                                   | -3.43694 | 4.31908  | -2.79202 |
| H                                   | -5.19121 | 2.48671  | -3.73133 |
| N                                   | -4.31359 | -1.16315 | -0.23563 |
| C                                   | -5.15101 | -1.01391 | -1.33415 |
| C                                   | -5.94133 | -2.21332 | -1.51744 |
| C                                   | -5.59096 | -3.08271 | -0.52411 |
| H                                   | -6.66928 | -2.35315 | -2.30349 |
| H                                   | -5.97624 | -4.0742  | -0.33506 |
| N                                   | -2.5897  | -1.03    | 2.00014  |
| C                                   | -3.07245 | -2.31271 | 2.21654  |
| C                                   | -1.73055 | -0.76178 | 3.05588  |
| C                                   | -2.48884 | -2.86419 | 3.42177  |
| C                                   | -1.66375 | -1.90773 | 3.93985  |
| H                                   | -2.70168 | -3.84918 | 3.81139  |
| H                                   | -1.06337 | -1.95508 | 4.83683  |
| N                                   | -1.82822 | 1.63798  | 1.25718  |
| C                                   | -0.2956  | 2.72987  | 2.61184  |
| H                                   | 0.3574   | 2.90638  | 3.45502  |
| C                                   | -1.06917 | 1.52181  | 2.40929  |
| C                                   | -3.03839 | 2.77015  | -1.21778 |
| C                                   | -4.47445 | 1.26582  | -1.98914 |
| C                                   | -4.58456 | -2.42502 | 0.28139  |
| C                                   | -1.02686 | 0.41627  | 3.24682  |
| H                                   | -0.38354 | 0.47672  | 4.11817  |
| C                                   | -2.10152 | 3.41578  | -0.42728 |
| H                                   | -1.79352 | 4.41266  | -0.72396 |
| C                                   | -5.22073 | 0.10604  | -2.15006 |
| H                                   | -5.91818 | 0.0744   | -2.9804  |
| C                                   | -3.99527 | -2.96883 | 1.41336  |
| H                                   | -4.29819 | -3.96796 | 1.70782  |
| C                                   | -0.58823 | 3.57315  | 1.57125  |



|   |          |          |          |
|---|----------|----------|----------|
| H | -0.22518 | 4.57664  | 1.39841  |
| C | -1.54369 | 2.88598  | 0.72755  |
| C | 0.31701  | -2.14262 | -1.07922 |
| C | 1.20153  | -2.9404  | -0.37723 |
| C | 2.57479  | -2.85273 | -0.69606 |
| C | 3.0077   | -1.94923 | -1.69382 |
| C | 2.11588  | -1.14118 | -2.43715 |
| C | 0.77501  | -1.28418 | -2.10548 |
| H | 3.26272  | -4.34189 | 0.7323   |
| H | 0.86687  | -3.60182 | 0.41383  |
| C | 3.58425  | -3.63211 | -0.02402 |
| C | 5.37187  | -2.53018 | -1.29099 |
| C | 4.90366  | -3.49118 | -0.31041 |
| H | 5.6694   | -4.06799 | 0.19092  |
| O | 4.35215  | -1.80576 | -1.9784  |
| O | 6.5409   | -2.27553 | -1.58003 |
| O | 2.6569   | -0.34065 | -3.40771 |
| C | 1.90612  | 0.82087  | -3.90102 |
| H | 1.60205  | 1.45057  | -3.063   |
| H | 2.61603  | 1.33859  | -4.54576 |
| H | 1.03125  | 0.50625  | -4.47193 |
| O | -0.29901 | -0.60984 | -2.73644 |
| C | -1.47329 | -0.93517 | -1.99834 |
| H | -2.38493 | -0.79116 | -2.55461 |
| C | -1.1376  | -1.94385 | -0.96458 |
| H | -1.83494 | -2.64614 | -0.53429 |
| C | 6.64552  | -0.74987 | 1.57455  |
| C | 6.4114   | 0.35311  | 0.74665  |
| C | 5.67166  | 1.45627  | 1.20974  |
| C | 5.16282  | 1.42177  | 2.51935  |
| C | 5.39492  | 0.31888  | 3.34969  |
| C | 6.14004  | -0.76884 | 2.8806   |
| H | 7.22406  | -1.58517 | 1.19365  |
| H | 6.80891  | 0.35145  | -0.2643  |
| H | 4.58478  | 2.26532  | 2.88492  |
| H | 5.0005   | 0.31277  | 4.36163  |
| H | 6.32831  | -1.62086 | 3.52699  |
| C | 5.43901  | 2.65662  | 0.31233  |
| C | 4.35057  | 2.45008  | -0.76437 |
| H | 6.35484  | 2.91108  | -0.2323  |
| H | 5.16508  | 3.52784  | 0.91825  |
| H | 4.60146  | 1.58285  | -1.38225 |
| C | 2.97142  | 2.1586   | -0.18009 |
| O | 2.18767  | 1.29698  | -0.59938 |
| O | 2.61164  | 3.04369  | 0.81135  |
| H | 1.68539  | 2.87955  | 1.11585  |

|                                     |          |          |          |
|-------------------------------------|----------|----------|----------|
| N                                   | 4.28814  | 3.62804  | -1.63571 |
| H                                   | 4.01984  | 4.48893  | -1.17416 |
| H                                   | 3.84179  | 3.49049  | -2.53292 |
| <b><sup>4</sup>INT<sub>ph</sub></b> |          |          |          |
| Fe                                  | -3.28314 | 0.33926  | 0.53434  |
| O                                   | -1.29835 | -0.68176 | -0.70695 |
| S                                   | -5.14009 | 1.34947  | 1.82393  |
| H                                   | -5.8161  | 1.91755  | 0.76013  |
| N                                   | -3.6643  | 1.30923  | -1.18834 |
| C                                   | -3.79472 | 2.96222  | -2.81102 |
| C                                   | -4.60113 | 1.93482  | -3.21672 |
| H                                   | -3.60384 | 3.90018  | -3.31176 |
| H                                   | -5.20036 | 1.86867  | -4.11317 |
| N                                   | -4.35772 | -1.24211 | -0.13995 |
| C                                   | -5.12307 | -1.29954 | -1.2985  |
| C                                   | -5.85808 | -2.54488 | -1.34124 |
| C                                   | -5.54854 | -3.23438 | -0.20324 |
| H                                   | -6.52711 | -2.83461 | -2.13846 |
| H                                   | -5.91373 | -4.20021 | 0.1143   |
| N                                   | -2.68427 | -0.75805 | 2.10955  |
| C                                   | -3.17185 | -2.00167 | 2.49216  |
| C                                   | -1.79658 | -0.37091 | 3.10616  |
| C                                   | -2.57965 | -2.39443 | 3.74994  |
| C                                   | -1.73095 | -1.39091 | 4.12683  |
| H                                   | -2.79497 | -3.31844 | 4.26654  |
| H                                   | -1.11451 | -1.33257 | 5.01198  |
| N                                   | -1.93055 | 1.76238  | 1.02237  |
| C                                   | -0.39404 | 3.03828  | 2.20069  |
| H                                   | 0.2767   | 3.3244   | 2.99845  |
| C                                   | -1.13715 | 1.79672  | 2.15727  |
| C                                   | -3.20642 | 2.57204  | -1.55154 |
| C                                   | -4.51983 | 0.90462  | -2.20802 |
| C                                   | -4.61688 | -2.42173 | 0.54807  |
| C                                   | -1.07291 | 0.81064  | 3.12866  |
| H                                   | -0.41132 | 0.97728  | 3.9715   |
| C                                   | -2.3023  | 3.34001  | -0.83515 |
| H                                   | -2.03519 | 4.30919  | -1.24182 |
| C                                   | -5.19521 | -0.30694 | -2.26356 |
| H                                   | -5.83702 | -0.4837  | -3.11982 |
| C                                   | -4.07047 | -2.77526 | 1.77129  |
| H                                   | -4.36735 | -3.72701 | 2.19822  |
| C                                   | -0.74679 | 3.75561  | 1.08765  |
| H                                   | -0.42151 | 4.74428  | 0.79609  |
| C                                   | -1.70481 | 2.95498  | 0.35454  |
| C                                   | 0.54112  | -2.35103 | -0.92512 |
| C                                   | 1.4069   | -3.04981 | -0.10478 |

|   |          |          |          |
|---|----------|----------|----------|
| C | 2.79318  | -2.95273 | -0.35932 |
| C | 3.25631  | -2.13686 | -1.4167  |
| C | 2.38597  | -1.43167 | -2.27957 |
| C | 1.03162  | -1.58201 | -2.00681 |
| H | 3.44015  | -4.27849 | 1.2386   |
| H | 1.04766  | -3.64297 | 0.72875  |
| C | 3.784    | -3.63466 | 0.43448  |
| C | 5.60909  | -2.6065  | -0.84093 |
| C | 5.11329  | -3.48395 | 0.2023   |
| H | 5.86517  | -3.98871 | 0.79424  |
| O | 4.6109   | -1.98275 | -1.64645 |
| O | 6.78578  | -2.34377 | -1.09108 |
| O | 2.96269  | -0.71177 | -3.29325 |
| C | 2.19526  | 0.33317  | -3.981   |
| H | 1.80453  | 1.0476   | -3.25454 |
| H | 2.92369  | 0.80141  | -4.64288 |
| H | 1.37744  | -0.09971 | -4.55909 |
| O | -0.01986 | -1.00733 | -2.75627 |
| C | -1.22947 | -1.28312 | -2.03972 |
| H | -2.10692 | -1.22876 | -2.6638  |
| C | -0.92275 | -2.17627 | -0.896   |
| H | -1.62032 | -2.86024 | -0.43585 |
| C | 6.55842  | -0.40684 | 1.82306  |
| C | 6.35292  | 0.58041  | 0.85365  |
| C | 5.57219  | 1.71566  | 1.13692  |
| C | 4.99492  | 1.83248  | 2.41303  |
| C | 5.19817  | 0.84543  | 3.38474  |
| C | 5.98289  | -0.27592 | 3.0932   |
| H | 7.17013  | -1.26936 | 1.57961  |
| H | 6.80557  | 0.46317  | -0.12689 |
| H | 4.38748  | 2.70322  | 2.64187  |
| H | 4.75088  | 0.95614  | 4.3683   |
| H | 6.14856  | -1.03771 | 3.84913  |
| C | 5.3694   | 2.78939  | 0.08521  |
| C | 4.32892  | 2.43385  | -1.00098 |
| H | 6.30565  | 2.98386  | -0.4491  |
| H | 5.0633   | 3.72745  | 0.56233  |
| H | 4.61498  | 1.50091  | -1.49535 |
| C | 2.93051  | 2.19417  | -0.43955 |
| O | 2.17861  | 1.26643  | -0.76406 |
| O | 2.51414  | 3.20122  | 0.40453  |
| H | 1.58095  | 3.05595  | 0.69472  |
| N | 4.29014  | 3.49352  | -2.01377 |
| H | 3.98908  | 4.39951  | -1.67526 |
| H | 3.8879   | 3.23764  | -2.90587 |

<sup>2</sup>P<sub>ph</sub>

|    |          |          |          |
|----|----------|----------|----------|
| Fe | -3.04822 | 0.0168   | 0.31965  |
| O  | -0.71228 | -0.44721 | -0.346   |
| S  | -5.17953 | 0.53225  | 0.99356  |
| H  | -5.86123 | -0.07778 | -0.04323 |
| N  | -2.50285 | -0.60323 | 2.15251  |
| C  | -2.27245 | -1.89606 | 4.06983  |
| C  | -1.80337 | -0.64854 | 4.36807  |
| H  | -2.328   | -2.7625  | 4.71293  |
| H  | -1.40036 | -0.2902  | 5.30414  |
| N  | -2.41702 | 1.86197  | 0.78237  |
| C  | -1.9326  | 2.31322  | 2.00162  |
| C  | -1.75375 | 3.7485   | 1.9637   |
| C  | -2.13772 | 4.16601  | 0.72086  |
| H  | -1.39407 | 4.344    | 2.79012  |
| H  | -2.16351 | 5.17363  | 0.33079  |
| N  | -3.37951 | 0.57219  | -1.57932 |
| C  | -3.31586 | 1.87043  | -2.07063 |
| C  | -3.82546 | -0.21212 | -2.63992 |
| C  | -3.70124 | 1.88984  | -3.465   |
| C  | -4.00887 | 0.60691  | -3.81757 |
| H  | -3.72809 | 2.77742  | -4.08015 |
| H  | -4.34043 | 0.23665  | -4.77669 |
| N  | -3.54271 | -1.87322 | -0.18578 |
| C  | -4.39056 | -3.72459 | -1.30894 |
| H  | -4.78049 | -4.31757 | -2.12347 |
| C  | -4.00913 | -2.33498 | -1.41497 |
| C  | -2.7156  | -1.86649 | 2.69223  |
| C  | -1.96305 | 0.16101  | 3.17998  |
| C  | -2.54142 | 2.98705  | -0.01826 |
| C  | -4.11123 | -1.56806 | -2.56712 |
| H  | -4.47618 | -2.05439 | -3.46535 |
| C  | -3.2582  | -2.9513  | 2.01849  |
| H  | -3.3814  | -3.87395 | 2.57575  |
| C  | -1.68777 | 1.51741  | 3.10875  |
| H  | -1.29028 | 1.99759  | 3.99622  |
| C  | -2.94897 | 2.99153  | -1.34281 |
| H  | -2.97484 | 3.94759  | -1.85478 |
| C  | -4.17323 | -4.10385 | -0.01387 |
| H  | -4.34849 | -5.06936 | 0.43815  |
| C  | -3.64616 | -2.95404 | 0.6865   |
| C  | 1.2174   | -2.06556 | -0.03973 |
| C  | 2.07135  | -2.51909 | 0.9498   |
| C  | 3.4515   | -2.57955 | 0.65843  |
| C  | 3.92304  | -2.16077 | -0.60771 |
| C  | 3.06421  | -1.69731 | -1.63855 |
| C  | 1.71256  | -1.68322 | -1.30902 |

|                              |          |          |          |
|------------------------------|----------|----------|----------|
| H                            | 4.07709  | -3.39504 | 2.57653  |
| H                            | 1.70432  | -2.82116 | 1.92416  |
| C                            | 4.42935  | -3.05384 | 1.60746  |
| C                            | 6.2619   | -2.61998 | 0.03306  |
| C                            | 5.75442  | -3.0801  | 1.31455  |
| H                            | 6.49705  | -3.43319 | 2.01802  |
| O                            | 5.26894  | -2.19785 | -0.90368 |
| O                            | 7.43757  | -2.56121 | -0.31846 |
| O                            | 3.64398  | -1.37844 | -2.82973 |
| C                            | 2.91166  | -0.58132 | -3.83449 |
| H                            | 2.50714  | 0.32187  | -3.3769  |
| H                            | 3.6723   | -0.34383 | -4.57655 |
| H                            | 2.11296  | -1.17755 | -4.27999 |
| O                            | 0.65589  | -1.35469 | -2.19211 |
| C                            | -0.55042 | -1.44723 | -1.44915 |
| H                            | -1.41952 | -1.60781 | -2.0634  |
| C                            | -0.2471  | -1.93103 | -0.08363 |
| H                            | -0.93346 | -2.46528 | 0.55334  |
| C                            | 6.42426  | 2.28526  | 0.14877  |
| C                            | 5.31928  | 3.14094  | 0.12435  |
| C                            | 4.14599  | 2.8277   | 0.83492  |
| C                            | 4.11368  | 1.6385   | 1.58104  |
| C                            | 5.22338  | 0.78557  | 1.61712  |
| C                            | 6.38032  | 1.10166  | 0.89634  |
| H                            | 7.31807  | 2.53925  | -0.41239 |
| H                            | 5.36558  | 4.06298  | -0.44978 |
| H                            | 3.21217  | 1.38295  | 2.13039  |
| H                            | 5.18462  | -0.12472 | 2.20698  |
| H                            | 7.23476  | 0.43255  | 0.90862  |
| C                            | 2.94523  | 3.75177  | 0.78232  |
| C                            | 2.17713  | 3.70444  | -0.55802 |
| H                            | 3.25273  | 4.79502  | 0.9178   |
| H                            | 2.24617  | 3.50676  | 1.58959  |
| H                            | 2.86688  | 3.91985  | -1.37898 |
| C                            | 1.58469  | 2.33006  | -0.86154 |
| O                            | 1.69549  | 1.74777  | -1.95067 |
| O                            | 0.82531  | 1.8449   | 0.16384  |
| H                            | 0.32113  | 1.01608  | -0.06927 |
| N                            | 1.12805  | 4.73277  | -0.56404 |
| H                            | 0.39692  | 4.57413  | 0.12271  |
| H                            | 0.75254  | 4.94119  | -1.48261 |
| <sup>4</sup> P <sub>ph</sub> |          |          |          |
| Fe                           | -3.32324 | 0.0089   | 0.33467  |
| O                            | -0.3867  | -0.49139 | -0.435   |
| S                            | -5.64754 | 0.49233  | 0.99274  |
| H                            | -6.25507 | -0.38566 | 0.11431  |

|   |          |          |          |
|---|----------|----------|----------|
| N | -2.65928 | -0.45458 | 2.18311  |
| C | -2.32979 | -1.5734  | 4.19229  |
| C | -1.96645 | -0.27143 | 4.39201  |
| H | -2.31585 | -2.38907 | 4.90043  |
| H | -1.59694 | 0.18974  | 5.29622  |
| N | -2.69611 | 1.89883  | 0.60643  |
| C | -2.226   | 2.46681  | 1.78326  |
| C | -2.04882 | 3.88969  | 1.60812  |
| C | -2.4147  | 4.18541  | 0.32423  |
| H | -1.69753 | 4.56273  | 2.37643  |
| H | -2.42881 | 5.14982  | -0.16283 |
| N | -3.55925 | 0.3822   | -1.63253 |
| C | -3.53276 | 1.6314   | -2.24439 |
| C | -3.94063 | -0.51585 | -2.62465 |
| C | -3.89263 | 1.50614  | -3.63789 |
| C | -4.13809 | 0.18315  | -3.87388 |
| H | -3.94419 | 2.3309   | -4.33336 |
| H | -4.43272 | -0.28857 | -4.7999  |
| N | -3.58364 | -1.9572  | -0.03836 |
| C | -4.23457 | -3.94973 | -1.03964 |
| H | -4.55791 | -4.62976 | -1.81425 |
| C | -3.98775 | -2.54205 | -1.23758 |
| C | -2.7638  | -1.68773 | 2.81881  |
| C | -2.18114 | 0.42718  | 3.14566  |
| C | -2.80892 | 2.94375  | -0.30164 |
| C | -4.13837 | -1.87605 | -2.44476 |
| H | -4.45289 | -2.45747 | -3.30444 |
| C | -3.20473 | -2.86234 | 2.22976  |
| H | -3.24911 | -3.75075 | 2.85012  |
| C | -1.97526 | 1.78438  | 2.96209  |
| H | -1.60598 | 2.35643  | 3.80584  |
| C | -3.20422 | 2.82433  | -1.62368 |
| H | -3.24273 | 3.72858  | -2.2209  |
| C | -3.98978 | -4.2225  | 0.27831  |
| H | -4.07204 | -5.16961 | 0.79128  |
| C | -3.58146 | -2.98721 | 0.90175  |
| C | 1.46614  | -2.11944 | 0.06414  |
| C | 2.31865  | -2.46019 | 1.09917  |
| C | 3.69931  | -2.56383 | 0.81891  |
| C | 4.17477  | -2.29755 | -0.48672 |
| C | 3.31884  | -1.94305 | -1.56035 |
| C | 1.96661  | -1.88947 | -1.23917 |
| H | 4.32332  | -3.12608 | 2.8269   |
| H | 1.95175  | -2.63905 | 2.10372  |
| C | 4.67587  | -2.91604 | 1.8213   |
| C | 6.51003  | -2.71222 | 0.20108  |

|   |          |          |          |
|---|----------|----------|----------|
| C | 6.00073  | -2.98807 | 1.53391  |
| H | 6.74138  | -3.2521  | 2.27734  |
| O | 5.52067  | -2.37833 | -0.77583 |
| O | 7.68234  | -2.73938 | -0.16322 |
| O | 3.88948  | -1.74858 | -2.78406 |
| C | 3.21468  | -0.89504 | -3.78503 |
| H | 2.89209  | 0.04118  | -3.32659 |
| H | 3.98264  | -0.72274 | -4.5375  |
| H | 2.36217  | -1.42225 | -4.21676 |
| O | 0.92061  | -1.65005 | -2.1599  |
| C | -0.28837 | -1.60055 | -1.40648 |
| H | -1.16597 | -1.80168 | -1.99851 |
| C | 0.00503  | -1.93448 | 0.00959  |
| H | -0.69905 | -2.36263 | 0.70638  |
| C | 6.50534  | 2.90619  | 0.42609  |
| C | 5.33486  | 3.65647  | 0.27682  |
| C | 4.10412  | 3.18051  | 0.76315  |
| C | 4.07728  | 1.93333  | 1.41056  |
| C | 5.24798  | 1.18161  | 1.56411  |
| C | 6.46524  | 1.66363  | 1.07032  |
| H | 7.44588  | 3.28899  | 0.04209  |
| H | 5.37356  | 4.62322  | -0.21892 |
| H | 3.13259  | 1.55268  | 1.78805  |
| H | 5.21072  | 0.22055  | 2.06791  |
| H | 7.37185  | 1.07768  | 1.18294  |
| C | 2.83658  | 3.98873  | 0.5661   |
| C | 2.16944  | 3.77846  | -0.8153  |
| H | 3.04479  | 5.06129  | 0.64338  |
| H | 2.10256  | 3.73792  | 1.34034  |
| H | 2.89108  | 4.00875  | -1.60403 |
| C | 1.74135  | 2.33064  | -1.0391  |
| O | 2.05661  | 1.64212  | -2.02027 |
| O | 0.88932  | 1.89393  | -0.06564 |
| H | 0.50235  | 0.99078  | -0.24797 |
| N | 1.02648  | 4.69057  | -0.95576 |
| H | 0.26217  | 4.48415  | -0.31933 |
| H | 0.70729  | 4.81658  | -1.90993 |

## Reactive metabolites formation reactions

### 8-MP epoxide

|   |         |          |         |
|---|---------|----------|---------|
| O | 0.30885 | -1.30181 | 1.57381 |
| C | 2.63025 | -3.02509 | 1.11868 |
| C | 3.87255 | -3.11436 | 0.50393 |
| C | 4.36591 | -4.39331 | 0.20092 |
| C | 3.61997 | -5.55226 | 0.51263 |
| C | 2.35644 | -5.48584 | 1.13671 |

|                          |          |          |          |
|--------------------------|----------|----------|----------|
| C                        | 1.90224  | -4.20219 | 1.42071  |
| H                        | 6.23461  | -3.72355 | -0.68576 |
| H                        | 4.45339  | -2.23398 | 0.26013  |
| C                        | 5.64501  | -4.60001 | -0.43748 |
| C                        | 5.35539  | -7.04235 | -0.41072 |
| C                        | 6.10785  | -5.83492 | -0.72339 |
| H                        | 7.06399  | -5.99497 | -1.20087 |
| O                        | 4.09267  | -6.81405 | 0.22062  |
| O                        | 5.68053  | -8.19765 | -0.6252  |
| O                        | 1.72758  | -6.67527 | 1.38947  |
| C                        | 0.40761  | -6.66838 | 2.04003  |
| H                        | -0.32894 | -6.13447 | 1.43501  |
| H                        | 0.14642  | -7.72301 | 2.11853  |
| H                        | 0.45716  | -6.21041 | 3.03072  |
| O                        | 0.68839  | -3.86212 | 2.03346  |
| C                        | 0.67896  | -2.448   | 2.10502  |
| H                        | -0.19972 | -2.0254  | 2.55693  |
| C                        | 1.80491  | -1.91724 | 1.57661  |
| H                        | 2.04814  | -0.87067 | 1.50639  |
| <b>TS<sub>Some</sub></b> |          |          |          |
| O                        | -0.00598 | -1.65997 | -0.40174 |
| C                        | -1.913   | -0.12648 | -0.65707 |
| C                        | -1.60971 | 1.15006  | -0.48743 |
| O                        | -0.60735 | 1.27449  | 0.60119  |
| C                        | -0.35988 | 0.06084  | 1.06111  |
| H                        | 1.37489  | -0.99642 | -0.01872 |
| C                        | -1.07208 | -0.99762 | 0.27592  |
| H                        | -1.68499 | -1.67159 | 0.88962  |
| O                        | 1.98763  | -0.29196 | 0.39312  |
| C                        | 2.52373  | 0.59199  | -0.61763 |
| H                        | 3.18198  | 1.3033   | -0.12371 |
| H                        | 3.10077  | 0.03258  | -1.35936 |
| H                        | 1.73277  | 1.14298  | -1.13879 |
| H                        | 0.31831  | -0.02428 | 1.88772  |
| C                        | -4.7142  | 1.33116  | -4.38316 |
| C                        | -4.17013 | 0.30705  | -3.64847 |
| C                        | -3.20228 | 0.57561  | -2.64187 |
| C                        | -2.80602 | 1.91748  | -2.40619 |
| C                        | -4.31836 | 2.6702   | -4.14773 |
| H                        | -2.93643 | -1.50273 | -2.05652 |
| H                        | -5.46297 | 1.12599  | -5.16241 |
| H                        | -4.47161 | -0.73644 | -3.82445 |
| C                        | -2.62219 | -0.46556 | -1.86622 |
| C                        | -1.83816 | 2.18519  | -1.39927 |
| O                        | -1.44607 | 3.54117  | -1.17017 |
| C                        | -2.33997 | 4.60873  | -1.49599 |



|                         |          |          |          |
|-------------------------|----------|----------|----------|
| H                       | -2.22302 | 4.86972  | -2.52707 |
| H                       | -3.34798 | 4.29638  | -1.31925 |
| H                       | -2.11776 | 5.45889  | -0.88546 |
| O                       | -3.38582 | 2.95853  | -3.18166 |
| O                       | -4.90411 | 3.71411  | -4.93008 |
| <b>P<sub>OMe</sub></b>  |          |          |          |
| C                       | -0.93015 | -0.96412 | 0.42259  |
| C                       | 0.1169   | -1.81924 | 0.17325  |
| C                       | 1.41136  | -1.28058 | 0.03434  |
| C                       | 1.60415  | 0.11254  | 0.15223  |
| C                       | 0.53754  | 0.99566  | 0.40964  |
| C                       | -0.71745 | 0.41082  | 0.53189  |
| H                       | 2.45446  | -3.1518  | -0.33196 |
| H                       | -0.04109 | -2.88699 | 0.07499  |
| C                       | 2.57587  | -2.07731 | -0.23546 |
| C                       | 3.99008  | -0.07781 | -0.25241 |
| C                       | 3.79601  | -1.51504 | -0.369   |
| H                       | 4.68757  | -2.09259 | -0.57141 |
| O                       | 2.83357  | 0.67133  | 0.01207  |
| O                       | 5.0259   | 0.51868  | -0.36157 |
| O                       | 0.77105  | 2.32591  | 0.56195  |
| C                       | 0.16518  | 3.17991  | -0.42253 |
| H                       | -0.92222 | 3.07886  | -0.41686 |
| H                       | 0.44543  | 4.19499  | -0.14597 |
| H                       | 0.55677  | 2.95222  | -1.41874 |
| O                       | -1.8697  | 1.11033  | 0.77339  |
| C                       | -2.97322 | 0.23527  | 0.49589  |
| H                       | -3.76793 | 0.48373  | 1.20814  |
| C                       | -2.39335 | -1.21033 | 0.68016  |
| H                       | -2.53496 | -1.51    | 1.72759  |
| O                       | -3.37423 | 0.49423  | -0.81146 |
| O                       | -2.96159 | -2.17372 | -0.18993 |
| H                       | -3.57284 | -2.71703 | 0.31448  |
| C                       | -4.74899 | 0.25374  | -1.08577 |
| H                       | -5.3921  | 0.77718  | -0.36508 |
| H                       | -4.93729 | 0.65118  | -2.08232 |
| H                       | -4.97925 | -0.81486 | -1.07721 |
| <b>TS<sub>SMe</sub></b> |          |          |          |
| O                       | -0.00598 | -1.65997 | -0.40174 |
| C                       | -1.913   | -0.12648 | -0.65707 |
| C                       | -1.60971 | 1.15006  | -0.48743 |
| O                       | -0.60735 | 1.27449  | 0.60119  |
| C                       | -0.35988 | 0.06084  | 1.06111  |
| H                       | 1.48449  | -1.08265 | -0.66367 |
| C                       | -1.07208 | -0.99762 | 0.27592  |
| H                       | -1.68499 | -1.67159 | 0.88962  |

|                        |          |          |          |
|------------------------|----------|----------|----------|
| C                      | 2.74554  | 1.22141  | -0.99078 |
| H                      | 3.40379  | 1.93272  | -0.49686 |
| H                      | 3.32258  | 0.66199  | -1.73251 |
| H                      | 1.95459  | 1.77239  | -1.51194 |
| H                      | 0.31831  | -0.02428 | 1.88772  |
| C                      | -4.7142  | 1.33116  | -4.38316 |
| C                      | -4.17013 | 0.30705  | -3.64847 |
| C                      | -3.20228 | 0.57561  | -2.64187 |
| C                      | -2.80602 | 1.91748  | -2.40619 |
| C                      | -4.31836 | 2.6702   | -4.14773 |
| H                      | -2.93643 | -1.50273 | -2.05652 |
| H                      | -5.46297 | 1.12599  | -5.16241 |
| H                      | -4.47161 | -0.73644 | -3.82445 |
| C                      | -2.62219 | -0.46556 | -1.86622 |
| C                      | -1.83816 | 2.18519  | -1.39927 |
| O                      | -1.44607 | 3.54117  | -1.17017 |
| C                      | -2.33997 | 4.60873  | -1.49599 |
| H                      | -2.22302 | 4.86972  | -2.52707 |
| H                      | -3.34798 | 4.29638  | -1.31925 |
| H                      | -2.11776 | 5.45889  | -0.88546 |
| O                      | -3.38582 | 2.95853  | -3.18166 |
| O                      | -4.90411 | 3.71411  | -4.93008 |
| S                      | 2.08553  | 0.13314  | 0.25359  |
| <b>PS<sub>Me</sub></b> |          |          |          |
| C                      | 2.63025  | -3.02509 | 1.11868  |
| C                      | 3.87255  | -3.11436 | 0.50393  |
| C                      | 4.36591  | -4.39331 | 0.20092  |
| C                      | 3.61997  | -5.55226 | 0.51263  |
| C                      | 2.35644  | -5.48584 | 1.13671  |
| C                      | 1.90224  | -4.20219 | 1.42071  |
| H                      | 6.23461  | -3.72355 | -0.68576 |
| H                      | 4.45339  | -2.23398 | 0.26013  |
| C                      | 5.64501  | -4.60001 | -0.43748 |
| C                      | 5.35539  | -7.04235 | -0.41072 |
| C                      | 6.10785  | -5.83492 | -0.72339 |
| H                      | 7.06399  | -5.99497 | -1.20087 |
| O                      | 4.09267  | -6.81405 | 0.22062  |
| O                      | 5.68053  | -8.19765 | -0.6252  |
| O                      | 1.72758  | -6.67527 | 1.38947  |
| C                      | 0.40761  | -6.66838 | 2.04003  |
| H                      | -0.32894 | -6.13447 | 1.43501  |
| H                      | 0.14642  | -7.72301 | 2.11853  |
| H                      | 0.45716  | -6.21041 | 3.03072  |
| O                      | 0.68839  | -3.86212 | 2.03346  |
| C                      | 0.67896  | -2.448   | 2.10502  |
| H                      | -0.16814 | -2.07661 | 1.56708  |

|   |          |          |         |
|---|----------|----------|---------|
| C | 1.80491  | -1.91724 | 1.57661 |
| H | 1.5563   | -1.28278 | 0.75166 |
| O | 2.50471  | -1.16833 | 2.57376 |
| H | 2.46478  | -0.23347 | 2.35921 |
| C | -0.49331 | -1.10917 | 3.61774 |
| H | -1.43112 | -1.61849 | 3.54021 |
| H | -0.42362 | -0.63372 | 4.57376 |
| H | -0.42352 | -0.37096 | 2.84633 |
| S | 0.5736   | -2.05051 | 3.47462 |

# Phenylalanine

|   |          |          |          |
|---|----------|----------|----------|
| C | 2.88041  | -0.83264 | 0.76367  |
| C | 1.62387  | -1.28122 | 0.367    |
| C | 0.81741  | -0.50911 | -0.47731 |
| C | 1.30674  | 0.72463  | -0.918   |
| C | 2.5646   | 1.17692  | -0.52395 |
| C | 3.35495  | 0.40012  | 0.31904  |
| H | 3.49144  | -1.44707 | 1.41565  |
| H | 1.26583  | -2.24691 | 0.71067  |
| H | 0.69548  | 1.33386  | -1.57515 |
| H | 2.92796  | 2.13516  | -0.87875 |
| H | 4.33462  | 0.74988  | 0.62455  |
| C | -0.55458 | -0.99856 | -0.88698 |
| C | -1.64849 | -0.76665 | 0.17361  |
| H | -0.53633 | -2.07508 | -1.07557 |
| H | -0.86224 | -0.51257 | -1.81697 |
| H | -1.35561 | -1.24866 | 1.10836  |
| C | -1.84364 | 0.70788  | 0.5206   |
| O | -1.88061 | 1.17062  | 1.63084  |
| O | -2.06238 | 1.46601  | -0.58993 |
| H | -2.22713 | 2.36796  | -0.27701 |
| N | -2.90337 | -1.38137 | -0.27928 |
| H | -3.26579 | -0.87793 | -1.08403 |
| H | -3.60831 | -1.33032 | 0.44989  |

# TS<sub>Phe</sub>

|   |          |          |          |
|---|----------|----------|----------|
| O | -3.20591 | -1.76968 | 0.42703  |
| C | -1.00653 | -1.21276 | -0.51466 |
| C | -0.81684 | 0.14672  | -0.69716 |
| O | -2.04092 | 0.7822   | -1.04597 |
| C | -2.9559  | -0.13365 | -1.12516 |
| H | -3.9384  | -0.45491 | 0.89794  |
| C | -2.50159 | -1.51485 | -0.70365 |
| H | -2.64643 | -2.24746 | -1.52623 |
| O | -4.24965 | 0.50328  | 0.87879  |
| C | -3.50698 | 1.24977  | 1.82214  |
| H | -2.55342 | 1.60625  | 1.40103  |
| H | -3.93934 | 0.19621  | -1.42249 |

|                        |          |          |          |
|------------------------|----------|----------|----------|
| C                      | 3.69823  | -1.4676  | 0.55095  |
| C                      | 2.505    | -2.08277 | 0.42277  |
| C                      | 1.3186   | -1.35926 | 0.04003  |
| C                      | 1.46695  | 0.02431  | -0.18468 |
| C                      | 3.85268  | -0.04159 | 0.30737  |
| H                      | -0.04137 | -3.0452  | 0.06271  |
| H                      | 4.59863  | -1.99334 | 0.83806  |
| H                      | 2.41652  | -3.14833 | 0.60774  |
| C                      | 0.06509  | -1.98349 | -0.12537 |
| C                      | 0.37259  | 0.84173  | -0.55226 |
| O                      | 0.40638  | 2.16156  | -0.82677 |
| C                      | 1.16127  | 3.05159  | 0.02326  |
| H                      | 0.94795  | 2.84687  | 1.07561  |
| H                      | 2.22945  | 2.96445  | -0.16398 |
| H                      | 0.80847  | 4.04851  | -0.23359 |
| O                      | 2.67856  | 0.63339  | -0.06864 |
| O                      | 4.85793  | 0.60574  | 0.39141  |
| O                      | -4.26788 | 2.39709  | 2.20889  |
| C                      | -3.18792 | 0.42022  | 3.07978  |
| H                      | -2.57038 | -0.41134 | 2.81136  |
| N                      | -2.47984 | 1.2617   | 4.0552   |
| H                      | -2.87863 | 1.12795  | 4.96243  |
| H                      | -1.51298 | 1.00718  | 4.07525  |
| C                      | -4.49945 | -0.09404 | 3.70189  |
| H                      | -5.00416 | -0.72428 | 2.99978  |
| H                      | -5.12626 | 0.73684  | 3.95019  |
| C                      | -4.18244 | -0.89706 | 4.97714  |
| C                      | -4.55916 | -0.40096 | 6.22551  |
| C                      | -3.51881 | -2.12037 | 4.88416  |
| C                      | -4.27167 | -1.12775 | 7.38065  |
| H                      | -5.08165 | 0.56388  | 6.29853  |
| C                      | -3.23204 | -2.84798 | 6.03948  |
| H                      | -3.22199 | -2.51161 | 3.90031  |
| C                      | -3.60822 | -2.35184 | 7.28762  |
| H                      | -4.56802 | -0.73649 | 8.36471  |
| H                      | -2.70915 | -3.81268 | 5.96583  |
| H                      | -3.3817  | -2.92474 | 8.19854  |
| <b>P<sup>Phe</sup></b> |          |          |          |
| O                      | 0.49069  | -3.49128 | 0.74929  |
| C                      | 2.2128   | -2.02484 | -0.33849 |
| C                      | 1.735    | -0.93142 | -1.05544 |
| O                      | 0.46707  | -1.27018 | -1.66139 |
| C                      | 0.17202  | -2.50549 | -1.32597 |
| C                      | 1.19174  | -3.15817 | -0.43587 |
| H                      | 1.62639  | -4.05142 | -0.91088 |
| O                      | -0.70564 | -2.14357 | -0.21532 |

|                        |          |          |          |
|------------------------|----------|----------|----------|
| C                      | -0.52296 | -0.92731 | 0.5006   |
| H                      | -0.77116 | -2.89492 | -1.66568 |
| C                      | 5.89538  | 0.81004  | 1.04375  |
| C                      | 5.27739  | -0.3946  | 1.07185  |
| C                      | 4.04799  | -0.63945 | 0.35478  |
| C                      | 3.51054  | 0.43505  | -0.38644 |
| C                      | 5.36217  | 1.93225  | 0.29801  |
| H                      | 3.77294  | -2.70077 | 0.97548  |
| H                      | 6.81315  | 0.99897  | 1.57806  |
| H                      | 5.70314  | -1.2083  | 1.64488  |
| C                      | 3.38252  | -1.88889 | 0.37812  |
| C                      | 2.31072  | 0.31947  | -1.12156 |
| O                      | 1.76091  | 1.31084  | -1.89255 |
| C                      | 1.38306  | 2.57997  | -1.22469 |
| H                      | 0.7519   | 2.35391  | -0.36728 |
| H                      | 2.27458  | 3.12721  | -0.93323 |
| H                      | 0.82657  | 3.12314  | -1.98036 |
| O                      | 4.14414  | 1.66756  | -0.41538 |
| O                      | 5.82647  | 3.0619   | 0.21428  |
| O                      | 0.34717  | -0.03644 | -0.00765 |
| C                      | -2.03519 | -0.20091 | 0.54938  |
| H                      | -2.65013 | -0.9993  | 0.96129  |
| N                      | -2.06083 | 0.92837  | 1.4056   |
| H                      | -1.4753  | 1.70799  | 1.1497   |
| H                      | -2.15375 | 0.7791   | 2.39672  |
| C                      | -2.46021 | 0.11941  | -0.89842 |
| H                      | -2.11917 | -0.69866 | -1.52965 |
| H                      | -1.93495 | 1.02132  | -1.22056 |
| C                      | -3.95823 | 0.29044  | -1.0353  |
| C                      | -4.5807  | 1.5248   | -0.79265 |
| C                      | -4.76241 | -0.80342 | -1.39429 |
| C                      | -5.96541 | 1.66337  | -0.90902 |
| H                      | -3.97646 | 2.3748   | -0.5048  |
| C                      | -6.14825 | -0.66925 | -1.50914 |
| H                      | -4.29566 | -1.76233 | -1.58471 |
| C                      | -6.75437 | 0.56624  | -1.26742 |
| H                      | -6.42771 | 2.62397  | -0.72166 |
| H                      | -6.75071 | -1.52352 | -1.78976 |
| H                      | -7.82718 | 0.67386  | -1.35876 |
| H                      | 1.11885  | -3.68771 | 1.44817  |
| <b>TS<sub>ro</sub></b> |          |          |          |
| O                      | 1.26977  | 0.22506  | 0.68276  |
| C                      | -1.25722 | 1.28429  | 0.09893  |
| C                      | -1.80255 | -0.13965 | 0.2098   |
| O                      | -0.77285 | -1.0305  | -0.11648 |
| C                      | 0.60823  | -0.07972 | -0.3936  |

|            |          |          |          |
|------------|----------|----------|----------|
| H          | 1.05228  | -0.63968 | -1.22029 |
| C          | 0.06065  | 1.28362  | -0.37065 |
| H          | 0.66917  | 2.13311  | -0.63573 |
| C          | -6.61308 | 1.60908  | 0.33206  |
| C          | -4.29954 | 0.87863  | 0.38521  |
| C          | -3.87691 | 2.20232  | 0.09817  |
| C          | -4.85377 | 3.22166  | -0.06908 |
| C          | -6.19088 | 2.92996  | 0.04547  |
| C          | -3.1878  | -0.14074 | 0.52204  |
| C          | -2.27498 | 2.27003  | 0.00476  |
| H          | -4.51571 | 4.24472  | -0.29162 |
| H          | -6.9493  | 3.71616  | -0.08334 |
| H          | -2.16642 | 3.50321  | -0.23755 |
| O          | -5.6906  | 0.60611  | 0.49838  |
| O          | -3.62711 | -1.47047 | 0.81141  |
| C          | -3.59319 | -1.68752 | 2.22443  |
| H          | -4.56045 | -1.99741 | 2.561    |
| H          | -2.87592 | -2.44841 | 2.45129  |
| H          | -3.31782 | -0.77913 | 2.71831  |
| O          | -8.01266 | 1.33831  | 0.44512  |
| <b>Pro</b> |          |          |          |
| C          | -1.4582  | -1.17051 | -0.1203  |
| C          | -0.32187 | -1.94245 | -0.02286 |
| C          | 0.93045  | -1.30026 | -0.01394 |
| C          | 0.99778  | 0.10615  | -0.08615 |
| C          | -0.15548 | 0.91284  | -0.19503 |
| C          | -1.36643 | 0.23071  | -0.23203 |
| H          | 2.15389  | -3.09086 | 0.14777  |
| H          | -0.37501 | -3.02205 | 0.05546  |
| C          | 2.17871  | -2.00734 | 0.0871   |
| C          | 3.42213  | 0.10163  | 0.03194  |
| C          | 3.35702  | -1.3508  | 0.10616  |
| H          | 4.30891  | -1.85867 | 0.17958  |
| O          | 2.18627  | 0.75971  | -0.06298 |
| O          | 4.4127   | 0.77768  | 0.04674  |
| O          | 0.00013  | 2.25113  | -0.32841 |
| C          | -0.82726 | 3.10003  | 0.48256  |
| H          | -0.73615 | 2.82818  | 1.53847  |
| H          | -0.44294 | 4.10714  | 0.33193  |
| H          | -1.87315 | 3.04868  | 0.177    |
| O          | -2.58801 | 0.83056  | -0.41807 |
| C          | -2.90097 | -1.49414 | -0.14679 |
| H          | -3.49276 | -1.71014 | 0.73348  |
| C          | -3.12978 | -2.09702 | -1.54528 |
| O          | -4.233   | -2.48414 | -1.91858 |
| H          | -2.23023 | -2.15817 | -2.1935  |

**TS<sub>diol</sub>**

|   |          |          |          |
|---|----------|----------|----------|
| O | -0.33149 | 1.28669  | 1.10868  |
| C | -1.26731 | 0.35469  | -1.03301 |
| C | -1.70084 | -0.72237 | -0.36116 |
| O | -0.88744 | -1.11341 | 0.67307  |
| C | 0.13635  | -0.13966 | 0.75726  |
| H | 1.04624  | -0.51533 | 1.20489  |
| C | -0.04668 | 0.82524  | -0.34207 |
| H | 0.7564   | 1.38264  | -0.80567 |
| O | 1.94128  | 0.30035  | 0.15978  |
| H | 2.81632  | 0.49272  | 0.5119   |
| H | 1.02233  | 1.08307  | 0.72577  |
| C | -5.76447 | -1.1874  | -2.98181 |
| C | -3.81566 | -0.92676 | -1.55947 |
| C | -3.37179 | 0.15123  | -2.36825 |
| C | -4.15178 | 0.54387  | -3.49018 |
| C | -5.32108 | -0.11161 | -3.78878 |
| C | -3.03446 | -1.31904 | -0.43733 |
| C | -2.15691 | 0.81068  | -2.03432 |
| H | -3.79878 | 1.38076  | -4.11104 |
| H | -5.92694 | 0.18954  | -4.65603 |
| H | -1.81991 | 1.64566  | -2.6668  |
| O | -3.49327 | -2.4067  | 0.36975  |
| C | -4.22503 | -1.89633 | 1.48732  |
| H | -5.16341 | -2.40509 | 1.56161  |
| H | -3.66232 | -2.05319 | 2.38378  |
| H | -4.3969  | -0.84883 | 1.35278  |
| O | -5.03043 | -1.58666 | -1.89261 |
| O | -6.98642 | -1.84897 | -3.31956 |

**P<sub>diol</sub>**

|   |         |          |          |
|---|---------|----------|----------|
| C | 2.63025 | -3.02509 | 1.11868  |
| C | 3.87255 | -3.11436 | 0.50393  |
| C | 4.36591 | -4.39331 | 0.20092  |
| C | 3.61997 | -5.55226 | 0.51263  |
| C | 2.35644 | -5.48584 | 1.13671  |
| C | 1.90224 | -4.20219 | 1.42071  |
| H | 6.23461 | -3.72355 | -0.68576 |
| H | 4.45339 | -2.23398 | 0.26013  |
| C | 5.64501 | -4.60001 | -0.43748 |
| C | 5.35539 | -7.04235 | -0.41072 |
| C | 6.10785 | -5.83492 | -0.72339 |
| H | 7.06399 | -5.99497 | -1.20087 |
| O | 4.09267 | -6.81405 | 0.22062  |
| O | 5.68053 | -8.19765 | -0.6252  |
| O | 1.72758 | -6.67527 | 1.38947  |
| C | 0.40761 | -6.66838 | 2.04003  |

|                        |          |          |          |
|------------------------|----------|----------|----------|
| H                      | -0.32894 | -6.13447 | 1.43501  |
| H                      | 0.14642  | -7.72301 | 2.11853  |
| H                      | 0.45716  | -6.21041 | 3.03072  |
| O                      | 0.68839  | -3.86212 | 2.03346  |
| C                      | 0.67896  | -2.448   | 2.10502  |
| C                      | 1.80491  | -1.91724 | 1.57661  |
| H                      | 2.32853  | -1.35687 | 2.32273  |
| H                      | 0.60013  | -2.15057 | 3.12983  |
| O                      | 1.47265  | -1.06931 | 0.47411  |
| H                      | 1.3697   | -0.1665  | 0.78384  |
| O                      | -0.45315 | -1.95166 | 1.38608  |
| H                      | -1.07195 | -1.55002 | 2.00039  |
| <b>TS<sub>r1</sub></b> |          |          |          |
| C                      | 1.38956  | -0.84857 | 0.30489  |
| C                      | 0.39152  | -1.77577 | 0.12071  |
| C                      | -0.94177 | -1.32654 | 0.04002  |
| C                      | -1.22124 | 0.05139  | 0.1579   |
| C                      | -0.2045  | 1.01221  | 0.32507  |
| C                      | 1.09197  | 0.51268  | 0.38958  |
| H                      | -1.8737  | -3.27029 | -0.22373 |
| H                      | 0.6171   | -2.83265 | 0.03587  |
| C                      | -2.06407 | -2.20519 | -0.1359  |
| C                      | -3.61838 | -0.31539 | -0.0806  |
| C                      | -3.32929 | -1.73469 | -0.19206 |
| H                      | -4.18749 | -2.37883 | -0.32562 |
| O                      | -2.49965 | 0.51557  | 0.10892  |
| O                      | -4.69391 | 0.21454  | -0.13459 |
| O                      | -0.42324 | 2.34394  | 0.48559  |
| C                      | -1.11298 | 3.03714  | -0.56884 |
| H                      | -2.16545 | 2.75604  | -0.60566 |
| H                      | -1.01871 | 4.09544  | -0.33027 |
| H                      | -0.63679 | 2.83828  | -1.53438 |
| O                      | 2.20481  | 1.29333  | 0.54515  |
| C                      | 3.42767  | 0.70059  | 0.22974  |
| C                      | 2.81326  | -1.24072 | 0.50622  |
| H                      | 3.04396  | -1.55078 | 1.52981  |
| H                      | 4.21555  | 1.03528  | 0.9065   |
| O                      | 3.45002  | -2.169   | -0.33447 |
| H                      | 3.48206  | -1.7722  | -1.21447 |
| O                      | 3.80191  | 0.82023  | -1.11255 |
| H                      | 4.07331  | 1.72807  | -1.2828  |
| <b>P<sub>r1</sub></b>  |          |          |          |
| C                      | 1.38956  | -0.84857 | 0.30489  |
| C                      | 0.39152  | -1.77577 | 0.12071  |
| C                      | -0.94177 | -1.32654 | 0.04002  |
| C                      | -1.22124 | 0.05139  | 0.1579   |



|                        |          |          |          |
|------------------------|----------|----------|----------|
| C                      | -0.2045  | 1.01221  | 0.32507  |
| C                      | 1.09197  | 0.51268  | 0.38958  |
| H                      | -1.8737  | -3.27029 | -0.22373 |
| H                      | 0.6171   | -2.83265 | 0.03587  |
| C                      | -2.06407 | -2.20519 | -0.1359  |
| C                      | -3.61838 | -0.31539 | -0.0806  |
| C                      | -3.32929 | -1.73469 | -0.19206 |
| H                      | -4.18749 | -2.37883 | -0.32562 |
| O                      | -2.49965 | 0.51557  | 0.10892  |
| O                      | -4.69391 | 0.21454  | -0.13459 |
| O                      | -0.42324 | 2.34394  | 0.48559  |
| C                      | -1.11298 | 3.03714  | -0.56884 |
| H                      | -2.16545 | 2.75604  | -0.60566 |
| H                      | -1.01871 | 4.09544  | -0.33027 |
| H                      | -0.63679 | 2.83828  | -1.53438 |
| O                      | 2.20481  | 1.29333  | 0.54515  |
| C                      | 2.20466  | 2.26039  | -0.5265  |
| C                      | 2.88764  | -1.00571 | 0.47275  |
| H                      | 3.21413  | 2.46957  | -0.81306 |
| O                      | 3.5244   | -1.93399 | -0.36794 |
| O                      | 1.5861   | 3.44639  | -0.11796 |
| H                      | 2.09713  | 3.83585  | 0.59899  |
| H                      | 1.67608  | 1.85758  | -1.3651  |
| H                      | 3.43376  | -0.43731 | 1.19634  |
| <b>TS<sub>r2</sub></b> |          |          |          |
| O                      | -4.04302 | -0.59074 | 0.97385  |
| C                      | -1.45394 | -1.1608  | -0.14972 |
| C                      | -1.3783  | 0.27743  | -0.26717 |
| O                      | -2.51892 | 0.8794   | -0.38593 |
| C                      | -3.70432 | -0.36879 | -0.23279 |
| H                      | -4.3981  | -0.01524 | -1.0006  |
| C                      | -2.78452 | -1.52703 | -0.30074 |
| C                      | 3.43324  | 0.06606  | 0.05136  |
| C                      | 1.00573  | 0.10659  | -0.10377 |
| C                      | 0.93634  | -1.32427 | 0.00592  |
| C                      | 2.18097  | -2.03407 | 0.13405  |
| C                      | 3.36161  | -1.38466 | 0.15427  |
| C                      | -0.121   | 0.91899  | -0.24679 |
| C                      | -0.29824 | -1.94657 | 0.00122  |
| H                      | 2.14701  | -3.1156  | 0.21722  |
| H                      | 4.31054  | -1.89373 | 0.25121  |
| H                      | -0.36949 | -3.02398 | 0.09485  |
| O                      | 2.19975  | 0.73699  | -0.07599 |
| O                      | 0.04225  | 2.25337  | -0.41564 |
| C                      | -0.6583  | 3.11286  | 0.50198  |
| H                      | -0.35948 | 2.89443  | 1.53178  |

|                       |          |          |          |
|-----------------------|----------|----------|----------|
| H                     | -0.35256 | 4.12458  | 0.24214  |
| H                     | -1.73814 | 3.00552  | 0.39507  |
| O                     | 4.42261  | 0.73885  | 0.06642  |
| H                     | -2.81356 | 0.34426  | 1.0092   |
| H                     | -2.90479 | -2.00847 | -1.24871 |
| O                     | -3.12917 | -2.45155 | 0.73434  |
| H                     | -3.64495 | -3.17093 | 0.36278  |
| <b>Pr<sub>2</sub></b> |          |          |          |
| C                     | 1.38956  | -0.84857 | 0.30489  |
| C                     | 0.39152  | -1.77577 | 0.12071  |
| C                     | -0.94177 | -1.32654 | 0.04002  |
| C                     | -1.22124 | 0.05139  | 0.1579   |
| C                     | -0.2045  | 1.01221  | 0.32507  |
| C                     | 1.09197  | 0.51268  | 0.38958  |
| H                     | -1.8737  | -3.27029 | -0.22373 |
| H                     | 0.6171   | -2.83265 | 0.03587  |
| C                     | -2.06407 | -2.20519 | -0.1359  |
| C                     | -3.61838 | -0.31539 | -0.0806  |
| C                     | -3.32929 | -1.73469 | -0.19206 |
| H                     | -4.18749 | -2.37883 | -0.32562 |
| O                     | -2.49965 | 0.51557  | 0.10892  |
| O                     | -4.69391 | 0.21454  | -0.13459 |
| O                     | -0.42324 | 2.34394  | 0.48559  |
| C                     | -1.11298 | 3.03714  | -0.56884 |
| H                     | -2.16545 | 2.75604  | -0.60566 |
| H                     | -1.01871 | 4.09544  | -0.33027 |
| H                     | -0.63679 | 2.83828  | -1.53438 |
| O                     | 2.20481  | 1.29333  | 0.54515  |
| C                     | 2.88764  | -1.00571 | 0.47275  |
| O                     | 3.5244   | -1.93399 | -0.36794 |
| H                     | 3.55644  | -1.53719 | -1.24794 |
| H                     | 2.1403   | 1.78198  | 1.36896  |
| C                     | 3.21236  | -1.44213 | 1.91348  |
| O                     | 4.3617   | -1.64762 | 2.29174  |
| H                     | 2.33745  | -1.5585  | 2.58736  |
| H                     | 3.3379   | -0.04931 | 0.30702  |
